# Supplementary material for: Effects of knee sleeves on coordination of lower-limb segments in healthy adults during level walking and one-leg hopping
Source: PeerJ. 2017 May 18;5:e3340. doi: 10.7717/peerj.3340 (PMC5438577; doi:10.7717/peerj.3340)
Supplement: Supplemental Information 1 — Segment angle during gait and one-leg hop [file peerj-05-3340-s001.xlsx]

## Sheet: THIGH
SUB1				SUB2				SUB3				SUB4				SUB5				SUB6				SUB7				SUB8				SUB9				SUB10				SUB11				MEAN				SD
gait	gait_sleeve	onehop	onehop_sleeve	gait	gait_sleeve	onehop	onehop_sleeve	gait	gait_sleeve	onehop	onehop_sleeve	gait	gait_sleeve	onehop	onehop_sleeve	gait	gait_sleeve	onehop	onehop_sleeve	gait	gait_sleeve	onehop	onehop_sleeve	gait	gait_sleeve	onehop	onehop_sleeve	gait	gait_sleeve	onehop	onehop_sleeve	gait	gait_sleeve	onehop	onehop_sleeve	gait	gait_sleeve	onehop	onehop_sleeve	gait	gait_sleeve	onehop	onehop_sleeve	gait	gait_sleeve	onehop	onehop_sleeve	gait	gait_sleeve
28.7769	28.1432	43.681	41.1018	29.8866	28.0396	33.6201	29.4201	24.6043	22.8729	35.4653	29.2582	25.0395	24.7855	39.961	43.9302	27.1016	22.718	42.4956	41.2963	28.9949	25.7524	35.3327	36.0605	26.7501	26.789	37.0407	37.5107	32.9291	33.6416	43.8794	49.1557	31.5427	28.0621	38.3466	39.1579	25.7533	24.9976	27.4343	30.504	29.3081	26.6957	38.4417	34.5913	28.2443	26.5907	37.7908	37.4533	2.66018	3.02918
28.707	27.7051	43.7809	41.1751	29.9875	28.0124	34.0612	30.1003	24.5811	22.8075	35.7733	28.8402	25.153	24.8838	40.299	43.8052	26.9987	22.597	42.4267	41.5915	28.8067	25.5256	35.9578	36.1	26.3308	26.6618	37.0234	37.4441	32.6459	33.4371	43.9906	49.3274	31.1027	27.723	38.1887	39.3142	25.5026	24.7042	26.892	30.4086	29.2718	26.6092	38.6119	34.9342	28.0989	26.4243	37.9096	37.5492	2.60083	2.98308
28.3907	27.2268	43.8446	41.2221	29.9686	27.813	34.5086	30.768	24.5501	22.6859	36.266	28.5139	25.1979	24.8922	40.6684	43.6871	26.9238	22.4853	42.4008	41.4328	28.5595	25.224	36.5453	36.209	25.917	26.4455	37.0852	37.4479	32.3053	33.1095	44.098	49.4515	30.6007	27.3335	38.0833	39.4499	25.2785	24.4014	26.3992	30.3781	29.2672	26.492	38.7843	35.2773	27.9054	26.1917	38.0621	37.6216	2.52597	2.91328
27.9903	26.7256	43.8342	41.2207	29.826	27.4509	34.9631	31.4106	24.4762	22.4906	37.038	28.3534	25.1108	24.7801	41.0928	43.581	26.8613	22.3717	42.4199	41.6115	28.2114	24.853	37.0657	36.4634	25.48	26.1122	37.2651	37.5542	31.8995	32.6515	44.1922	49.4972	30.0257	26.8891	38.0655	39.5433	25.1066	24.0733	26.0291	30.4851	29.2519	26.3324	38.9636	35.6208	27.6582	25.8846	38.2663	37.7583	2.44445	2.82201
27.582	26.2231	43.7253	41.154	29.5783	26.9615	35.4245	32.0198	24.3403	22.2184	38.0251	28.3943	24.8572	24.5338	41.5827	43.4888	26.798	22.253	42.4714	41.4336	27.7493	24.4376	37.5097	36.9265	25.0062	25.6623	37.5617	37.7533	31.4386	32.0828	44.2666	49.452	29.3867	26.3972	38.1547	39.5772	25.0036	23.7157	25.8637	30.7837	29.184	26.1267	39.1616	35.9615	27.3567	25.5102	38.5224	37.9041	2.36607	2.71612
27.2372	25.7415	43.5106	41.01	29.2612	26.3956	35.891	32.5901	24.1428	21.8811	39.0357	28.6073	24.4443	24.159	42.1241	43.4014	26.7217	22.1342	42.5306	41.4344	27.197	24.0129	37.8843	37.5935	24.5081	25.1232	37.9396	37.9917	30.9492	31.4479	44.3154	49.3163	28.7136	25.8765	38.3496	39.5321	24.976	23.3381	25.9518	31.2674	29.0322	25.8773	39.3906	36.2929	27.0167	25.0897	38.8112	38.0943	2.30102	2.60616
26.4386	25.2978	43.1952	40.7839	28.9152	25.8036	36.3581	33.1184	23.8995	21.5041	39.8696	28.9105	23.9235	23.6807	42.6778	43.2954	26.6272	22.026	42.5696	41.2896	26.6044	23.6082	38.2031	38.3772	24.0208	24.5395	38.3334	38.1864	30.4641	30.8023	44.3341	49.096	28.0516	25.3514	38.6197	39.3846	25.0193	22.9574	26.2918	31.8749	28.789	25.5844	39.6533	36.6077	26.6139	24.6505	39.1005	38.2659	2.25438	2.50301
25.8561	24.8976	42.7864	40.4799	28.5691	25.2212	36.8189	33.6001	23.627	21.1158	40.4202	29.1915	23.3729	23.1343	43.1937	43.1376	26.5189	21.9382	42.5645	41.0641	26.0246	23.2363	38.4726	39.1375	23.5791	23.956	38.6613	38.2606	30.0032	30.1923	44.3189	48.7944	27.4464	24.8446	38.8988	39.1084	25.114	22.5899	26.8531	32.5197	28.4743	25.2384	39.9359	36.9017	26.2351	24.215	39.3568	38.3814	2.22938	2.41398
25.3732	24.5325	42.2879	40.1064	28.233	24.6643	37.2641	34.0263	23.3295	20.7362	40.7015	29.335	22.8672	22.556	43.6174	42.8949	26.4036	21.8692	42.5007	40.7379	25.4937	22.893	38.6736	39.7286	23.1955	23.4035	38.8462	38.1667	29.5541	29.6347	44.2658	48.4101	26.9253	24.3672	39.0885	38.6827	25.2247	22.2447	27.5906	33.1098	28.1228	24.8204	40.213	37.1773	25.8839	23.7929	39.5499	38.3978	2.21486	2.33988
25.1476	24.1805	41.7018	39.6725	27.8979	24.1306	37.686	34.3828	22.9953	20.3685	40.7927	29.2673	22.4485	21.9748	43.8956	42.5454	26.2804	21.7991	42.3764	40.1409	25.0176	22.5608	38.7605	40.0684	22.8559	22.8928	38.8328	37.9005	29.0747	29.1088	44.1678	47.9425	26.4847	23.9141	39.0797	38.1056	25.3068	21.9177	28.4311	33.5585	27.7605	24.3087	40.4525	37.4398	25.57	23.3779	39.6524	38.2749	2.19394	2.2751
25.0376	23.811	41.0341	39.1829	27.5404	23.6039	38.0744	34.649	22.6041	19.9986	40.7507	28.9841	22.1109	21.405	43.9904	42.0864	26.1312	21.6906	42.2021	39.7094	24.5759	22.2146	38.6886	40.1631	22.5217	22.4151	38.5974	37.4991	28.5123	28.568	44.0159	47.3948	26.0905	23.4639	38.7913	37.4038	25.3188	21.5887	29.2814	33.8003	27.3907	23.688	40.6178	37.6908	25.2576	22.9497	39.6404	38.0512	2.16231	2.21142
24.6687	23.3902	40.2942	38.6368	27.1319	23.0577	38.4091	34.7957	22.1394	19.6013	40.5742	28.5361	21.8053	20.8425	43.8918	41.56	25.9216	21.4991	41.9936	39.2112	24.1373	21.8246	38.4439	40.0755	22.1406	21.9438	38.1462	37.0086	27.8219	27.9587	43.8025	46.7751	25.6892	22.9842	38.2001	36.6302	25.2342	21.225	30.0363	33.8123	26.9985	22.954	40.6747	37.9237	24.8808	22.4801	39.497	37.7241	2.12473	2.14196
24.0989	22.8865	39.4878	38.0288	26.6495	22.4625	38.6603	34.7906	21.5975	19.1507	40.2441	28.0055	21.4638	20.2684	43.6285	40.998	25.6126	21.1866	41.761	38.8514	23.6676	21.3626	38.0492	39.8763	21.6628	21.4412	37.5169	36.4537	26.9785	27.2379	43.526	46.0971	25.2232	22.4391	37.3521	35.8462	25.0442	20.7904	30.6064	33.6195	26.5637	22.114	40.6009	38.1227	24.4148	21.94	39.2212	37.3355	2.08677	2.06305
23.5741	22.2758	38.6102	37.3521	26.0772	21.7902	38.7971	34.609	20.9842	18.6262	39.7646	27.4759	21.0293	19.6582	43.2514	40.4153	25.1738	20.7279	41.4998	38.6247	23.135	20.8075	37.5467	39.598	21.0588	20.8689	36.768	35.8391	25.9822	26.3846	43.1906	45.3793	24.6479	21.7987	36.3457	35.0977	24.7514	20.2549	30.9692	33.2813	26.0661	21.182	40.3847	38.2645	23.8618	21.3068	38.8298	36.9033	2.05341	1.97484
22.9048	21.5463	37.6474	36.602	25.4038	21.0191	38.7925	34.2327	20.3077	18.015	39.1465	27.0062	20.4699	18.992	42.7164	39.8195	24.5925	20.111	41.1879	38.2578	22.5135	20.1439	36.9765	39.2421	20.3245	20.1985	35.9572	35.1524	24.8565	25.4014	42.8024	44.635	23.9404	21.0476	35.3062	34.3977	24.357	19.6028	31.1786	32.8632	25.4859	20.1747	40.0254	38.3229	23.196	20.5684	38.3397	36.4119	2.03217	1.88057
22.1211	20.6987	36.5772	35.776	24.623	20.1385	38.624	33.6465	19.5732	17.3107	38.3898	26.6291	19.7753	18.2596	42.0576	39.2053	23.8715	19.3364	40.7892	37.9024	21.7843	19.3586	36.3591	38.8184	19.4757	19.4177	35.1267	34.3578	23.6356	24.3071	42.3672	43.8684	23.1015	20.1857	34.3582	33.7248	23.8532	18.8355	31.3201	32.4184	24.8087	19.1088	39.5327	38.2727	22.4203	19.7234	37.7729	35.8745	2.02294	1.78476
21.2759	19.7446	35.3702	34.8691	23.7349	19.1493	38.2736	32.846	18.7819	16.5132	37.5	26.3527	18.9491	17.4595	41.3949	38.5578	23.0237	18.4157	40.2668	37.3156	20.9353	18.443	35.6897	38.3659	18.5398	18.5304	34.2978	33.3989	22.3476	23.1252	41.8892	43.0932	22.1508	19.2227	33.5612	33.0296	23.225	17.9691	31.4581	31.9787	24.0298	17.9987	38.9177	38.0959	21.5449	18.7792	37.1472	35.264	2.02087	1.69122
20.278	18.7037	33.9945	33.8707	22.7493	18.0634	37.7343	31.8454	17.9321	15.6274	36.5084	26.1557	18.0033	16.5955	40.6952	37.859	22.0677	17.3699	39.5986	36.5019	19.9634	17.4001	34.9422	37.916	17.5444	17.5511	33.4688	32.2162	21.0076	21.8772	41.3701	42.0604	21.1179	18.1724	32.8827	32.2513	22.46	17.0255	31.5969	31.5542	23.1518	16.8583	38.1806	37.7873	20.5705	17.7495	36.452	34.5471	2.0218	1.60266
19.2993	17.5989	32.4198	32.7668	21.6856	16.8991	37.0194	30.6684	17.0204	14.6624	35.4432	26.0114	16.9569	15.6739	39.9294	37.0929	21.0242	16.2264	38.7866	35.6156	18.8751	16.2436	34.0805	37.4385	16.5108	16.4985	32.6164	30.7585	19.6234	20.5804	40.8093	41.0094	20.031	17.0505	32.2402	31.3469	21.559	16.0246	31.6921	31.1398	22.1819	15.7004	37.3107	37.352	19.5243	16.6508	35.668	33.7455	2.02	1.521
18.3243	16.451	30.6151	31.5362	20.567	15.6758	36.1609	29.3353	16.0446	13.63	34.3042	25.9139	15.8332	14.7025	39.0827	36.247	19.9108	15.0137	37.8541	34.8997	17.6846	14.9919	33.0749	36.874	15.4546	15.3891	31.7035	28.9949	18.2038	19.2473	40.2065	40.5765	18.9087	15.8725	31.5466	30.2963	20.5422	14.98	31.6965	30.7193	21.1294	14.5361	36.2966	36.7997	18.4185	15.4991	34.7765	32.9266	2.01593	1.4476
17.2701	15.2759	28.5465	30.1491	19.4133	14.4109	35.1943	27.8588	15.0069	12.5433	33.0576	25.8756	14.6549	13.6889	38.1588	35.3111	18.7409	13.7544	36.8301	33.4169	16.4113	13.6642	31.913	36.1722	14.3873	14.2345	30.6852	26.9112	16.764	17.8861	39.5654	40.1065	17.7593	14.6506	30.7396	29.0898	19.4431	13.8981	31.5969	30.2515	20.005	13.3702	35.1314	36.1368	17.2596	14.307	33.7653	31.9345	2.01151	1.38342
16.2255	14.0863	26.18	28.5691	18.2374	13.1174	34.1437	26.2442	13.9176	11.4157	31.6564	25.915	13.4412	12.6404	37.1768	34.2726	17.5247	12.4631	35.7307	31.9325	15.0758	12.2784	30.5955	35.2878	13.3183	13.045	29.5168	24.4904	15.3195	16.502	38.895	39.6292	16.5838	13.3937	29.7838	27.7179	18.2927	12.7814	31.3986	29.6768	18.8222	12.2012	33.8149	35.3629	16.069	13.0841	32.6266	30.8271	2.00707	1.32933
15.0761	12.8936	23.4871	26.7588	17.0455	11.8036	33.0191	24.487	12.7931	10.2597	29.9534	26.0416	12.2085	11.5643	36.1608	33.1139	16.2722	11.1484	34.555	30.6245	13.6966	10.8472	29.1243	34.1714	12.2572	11.8302	28.158	21.7061	13.8788	15.0983	38.208	38.8139	15.3795	12.1095	28.645	26.1625	17.111	11.6331	31.1037	28.948	17.6009	11.0277	32.3625	34.4779	14.8472	11.8378	31.3433	29.5732	2.00146	1.2861
13.779	11.7079	20.4527	24.6843	15.8409	10.4743	31.8204	22.5712	11.6533	9.08623	27.9411	26.245	10.9729	10.4695	35.1205	31.8131	14.9926	9.81639	33.2913	29.129	12.286	9.37848	27.4959	32.7667	11.213	10.6002	26.5716	18.5199	12.4443	13.6763	37.5164	37.6404	14.1446	10.8051	27.2767	24.3983	15.9121	10.4577	30.7304	28.0258	16.3674	9.85069	30.8096	33.4843	13.6006	10.5748	29.9115	28.1162	1.99362	1.25452
12.8175	10.5362	17.0892	22.3201	14.629	9.13281	30.542	20.468	10.5171	7.90344	25.7137	26.4979	9.75194	9.36602	34.0549	30.3473	13.6944	8.47299	31.9225	27.5801	10.8525	7.87764	25.7037	31.029	10.1912	9.36589	24.7337	14.9026	11.0158	12.2326	36.8255	36.2022	12.8799	9.48788	25.6383	22.4055	14.7046	9.25888	30.3343	26.8617	15.1477	8.67103	29.1954	32.3786	12.382	9.30049	28.3412	26.4539	1.99131	1.23512
11.762	9.38235	13.454	19.6523	13.4188	7.78409	29.1743	18.135	9.39718	6.71559	23.1716	26.7605	8.56403	8.26572	32.9632	28.6957	12.3837	7.12432	30.4312	25.999	9.40268	6.34996	23.7387	28.9281	9.19069	8.13627	22.6386	10.8735	9.5931	10.7589	36.1266	34.6176	11.5901	8.16602	23.7163	20.17	13.4913	8.03778	29.9769	25.3879	13.9582	7.48991	27.5275	31.1567	11.1593	8.01918	26.629	24.5797	1.99199	1.22812
10.7072	8.24888	9.66064	16.6845	12.2194	6.43522	27.7058	15.5242	8.2968	5.52429	20.2493	26.9844	7.42462	7.18113	31.8468	26.8368	11.0662	5.77571	28.8019	23.8921	7.94211	4.8017	21.5858	26.4487	8.20436	6.91565	20.2728	6.56054	8.17698	9.24889	35.3865	32.8436	10.2858	6.84975	21.52	17.6786	12.2707	6.79409	29.6579	23.5369	12.8007	6.30993	25.7595	29.8158	9.94498	6.73502	24.7679	22.4369	1.99818	1.23507
9.76235	7.13677	5.87829	13.4456	11.039	5.09434	26.1202	12.5982	7.21136	4.33098	16.9235	27.0991	6.34305	6.12431	30.7069	24.7467	9.75002	4.43141	27.023	22.0174	6.47616	3.24393	19.2237	23.5843	7.22337	5.70267	17.6093	2.24892	6.77041	7.70718	34.5465	30.8412	8.98329	5.54976	19.0759	14.9281	11.0393	5.52932	29.2685	21.2626	11.6635	5.1335	23.8308	28.348	8.75108	5.45311	22.7461	20.1018	2.01567	1.25928
8.70072	6.0448	2.31588	9.99644	9.88599	3.77083	24.3972	9.35019	6.13108	3.13774	13.2092	31.7398	5.32062	5.10573	29.5374	22.4029	8.4468	3.09444	25.0874	19.943	5.00999	1.69251	16.6334	20.3183	6.24144	4.49457	14.626	-1.66234	5.37932	6.14763	33.5433	28.5908	7.70063	4.2756	16.4233	11.9411	9.79379	4.24807	28.6162	18.547	10.5273	3.9632	21.7154	26.7437	7.55797	4.17956	20.555	17.9919	2.03385	1.30329
7.61994	4.971	-0.804182	6.43173	8.76839	2.476	22.5154	5.83594	5.04417	1.94695	9.1842	32.5543	4.34866	4.13313	28.3202	19.7896	7.16974	1.76672	22.9923	17.4792	3.54783	0.164557	13.8106	16.6102	5.25582	3.29034	11.3367	-4.75792	4.0091	4.58559	32.3312	26.1103	6.45408	3.03365	13.6107	8.77299	8.5318	2.95737	27.5466	15.382	9.37031	2.80369	19.3971	24.9922	6.37453	2.92082	18.2037	15.3819	2.05572	1.36689
6.64491	3.91414	-3.27659	2.87785	7.69125	1.22029	20.4563	2.19189	3.94	0.761924	5.07963	30.9695	3.41161	3.20871	27.0288	16.905	5.93099	0.449583	20.7389	15.0358	2.09437	-1.32643	10.7787	12.4569	4.26605	2.09143	7.80811	-6.70875	2.65943	3.03387	30.8782	23.4427	5.25469	1.82572	10.6979	5.51346	7.25391	1.66684	26.0395	11.7632	8.17668	1.66199	16.8605	23.0826	5.21126	1.68255	15.7354	12.5028	2.08966	1.44772
5.46586	2.87195	-4.94296	-0.513577	6.65641	0.0106067	18.2027	-1.40389	2.81222	-0.411541	1.33002	26.3675	2.49371	2.32705	25.6372	13.778	4.7376	-0.85505	18.3359	12.4332	0.655608	-2.77196	7.59687	7.96687	3.27149	0.901353	4.16344	-7.36254	1.32567	1.50036	29.1545	20.6276	4.10744	0.650391	7.7665	2.29274	5.96585	0.387852	24.1744	7.72637	6.9421	0.544421	14.1111	21.0065	4.03945	0.468676	13.23	9.35626	2.11688	1.54158
4.47696	1.83903	-5.7113	-3.5839	5.66503	-1.1515	15.7324	-4.76463	1.66094	-1.56608	-1.5328	24.8598	1.58201	1.47726	24.1266	10.571	3.58884	-2.14352	15.8031	9.42438	-0.76191	-4.1654	4.36195	3.35533	2.27004	-0.275533	0.608982	-6.79865	0.00596187	-0.0105855	27.1311	17.696	3.0139	-0.493874	4.92837	-0.713058	4.67759	-0.868999	21.9924	3.42636	5.6742	-0.543626	11.2022	18.7514	2.89578	-0.718438	10.7857	6.56582	2.16633	1.64259
3.51763	0.807734	-5.5653	-6.18818	4.71658	-2.27098	13.021	-7.67894	0.49381	-2.69499	-3.08256	23.6122	0.666514	0.650388	22.4858	7.3647	2.47757	-3.41021	13.1808	6.1812	-2.15241	-5.50119	1.20171	-1.07312	1.26025	-1.43764	-2.57185	-5.29462	-1.29696	-1.49831	24.7901	14.686	1.97474	-1.6053	2.32501	-3.29846	3.39944	-2.09745	19.4176	-0.794423	4.38956	-1.59452	8.25348	16.2963	1.76788	-1.8775	8.49598	3.98297	2.22921	1.74482
2.56998	-0.22967	-4.56477	-8.20668	3.80594	-3.35838	10.0626	-9.93278	-0.677153	-3.79403	-3.13273	22.2656	-0.260215	-0.158239	20.7109	4.2341	1.39393	-4.64881	10.5389	2.89983	-3.51249	-6.77687	-1.73211	-4.94522	0.243418	-2.58574	-5.07038	-3.20526	-2.57951	-2.96543	22.1374	11.6514	0.99033	-2.67786	0.117247	-5.26382	2.13757	-3.29729	16.2808	-4.42932	3.10871	-2.59894	5.43762	13.6232	0.656409	-3.0083	6.43504	1.69919	2.30401	1.84439
1.79092	-1.27826	-2.83524	-9.55147	2.92487	-4.42667	6.89572	-11.358	-1.8422	-4.86286	-1.78728	20.515	-1.20347	-0.952974	18.8008	1.27886	0.32741	-5.85502	7.97962	-0.0245944	-4.83856	-7.99501	-4.27318	-7.86859	-0.775436	-3.71965	-6.6291	-0.858279	-3.84264	-4.40967	19.221	8.66497	0.058461	-3.7069	-1.54308	-6.46559	0.892888	-4.47368	12.4093	-6.96086	1.85011	-3.55537	2.95195	10.7356	-0.423422	-4.11237	4.65369	-0.172095	2.40295	1.93999
0.999744	-2.33922	-0.546414	-10.1739	2.06573	-5.48759	3.61818	-11.8737	-2.99724	-5.90516	0.558026	18.5155	-2.16706	-1.7394	16.7241	-1.38976	-0.733033	-7.02767	5.6313	-2.65281	-6.12453	-9.16175	-6.25952	-9.52528	-1.78838	-4.83775	-7.11741	1.47597	-5.08762	-5.8195	16.143	5.81827	-0.828816	-4.69558	-2.55111	-6.85653	-0.339257	-5.63477	7.73835	-8.06371	0.622043	-4.47326	0.978329	7.67542	-1.48895	-5.19288	3.17426	-1.55005	2.50755	2.0313
0.0477491	-3.40938	2.11752	-10.0735	1.22018	-6.54989	0.384477	-11.5091	-4.14263	-6.92649	3.35998	16.164	-3.15366	-2.52435	14.425	-3.66363	-1.79727	-8.16775	3.63231	-4.77699	-7.36418	-10.2849	-7.5591	-9.78431	-2.78853	-5.93723	-6.56657	3.60228	-6.31069	-7.18151	13.0345	3.21526	-1.68409	-5.65077	-2.87418	-6.48629	-1.5654	-6.78566	2.4574	-7.72558	-0.582129	-5.36308	-0.357675	4.53241	-2.55642	-6.25282	2.00488	-2.40959	2.5961	2.11787
-0.830537	-4.48171	4.98098	-9.30251	0.373381	-7.61679	-2.6082	-10.4	-5.27862	-7.93374	6.15035	13.3806	-4.16442	-3.31559	11.9419	-5.4506	-2.87206	-9.27894	2.10897	-6.03751	-8.55421	-11.3744	-8.09625	-8.77777	-3.77219	-7.01443	-5.14907	5.43197	-7.50612	-8.48873	10.0107	0.958436	-2.52344	-6.57514	-2.55548	-5.48451	-2.78795	-7.92476	-2.86643	-6.24825	-1.77533	-6.23141	-1.01159	1.44765	-3.60832	-7.29415	1.17327	-2.77113	2.68519	2.19975
-1.70301	-5.5451	7.88971	-7.96022	-0.496512	-8.68369	-5.14673	-8.75073	-6.40386	-8.93389	8.67447	10.1073	-5.19624	-4.1197	9.23357	-6.68446	-3.96168	-10.3655	1.15031	-6.62575	-9.6951	-12.4391	-7.87051	-6.85322	-4.73667	-8.06457	-3.11551	6.97961	-8.66502	-9.73938	7.15926	-0.863546	-3.36228	-7.46631	-1.70381	-4.03213	-4.00493	-9.04437	-7.37452	-4.11123	-2.96421	-7.08413	-1.01688	-1.40089	-4.65359	-8.31688	0.716305	-2.74503	2.76191	2.27735
-2.61566	-6.58504	10.7151	-6.17879	-1.41031	-9.73792	-7.04288	-6.77842	-7.51404	-9.92991	10.8751	6.32175	-6.2398	-4.94007	6.27913	-7.33367	-5.06775	-11.4291	0.789164	-6.36569	-10.79	-13.483	-6.96195	-4.40875	-5.67682	-9.08249	-0.719611	8.32795	-9.77391	-10.9302	4.57838	-2.18427	-4.20662	-8.31972	-0.469235	-2.32152	-5.2114	-10.1337	-10.2586	-1.78025	-4.14582	-7.92835	-0.454698	-3.83195	-5.69565	-9.31814	0.666357	-2.41214	2.81578	2.35028
-3.5184	-7.58529	13.3568	-4.10442	-2.37938	-10.7644	-8.17389	-4.66753	-8.6023	-10.919	12.8009	2.06315	-7.28297	-5.77525	3.14381	-7.40881	-6.18606	-12.4674	1.0009	-5.77425	-11.8434	-14.5048	-5.51553	-1.7673	-6.58444	-10.0621	1.82923	9.5842	-10.8231	-12.0556	2.37936	-2.96755	-5.05082	-9.13269	0.98873	-0.51539	-6.39816	-11.1824	-11.09	0.426068	-5.30943	-8.77337	0.580876	-5.69534	-6.72531	-10.2929	1.02738	-1.89338	2.84989	2.41723
-4.17556	-8.52994	15.7457	-1.87441	-3.40883	-11.7555	-8.51151	-2.55435	-9.66057	-11.8947	14.5207	-2.52314	-8.31749	-6.61997	-0.0412637	-6.96478	-7.3071	-13.4749	1.71875	-4.73693	-12.8584	-15.4985	-3.70704	0.833929	-7.45242	-10.9961	4.37375	10.8418	-11.8085	-13.109	0.64715	-3.22174	-5.88306	-9.90775	2.53214	1.27851	-7.55156	-12.1803	-9.90049	2.36831	-6.44469	-9.63064	1.99918	-6.89686	-7.71528	-11.2361	1.76155	-1.22269	2.89243	2.47618
-5.26248	-9.40587	17.8442	0.401347	-4.50197	-12.7142	-8.12658	-0.528251	-10.6805	-12.8484	16.0722	-7.15476	-9.33775	-7.46636	-3.09502	-6.09484	-8.42001	-14.444	2.8541	-3.5855	-13.835	-16.4547	-1.70626	3.23329	-8.27595	-11.8754	6.79659	12.1699	-12.7227	-14.0809	-0.574684	-3.009	-6.69179	-10.6506	4.06962	3.00904	-8.65576	-13.1167	-7.14729	4.04274	-7.54686	-10.5079	3.71423	-7.41091	-8.72098	-12.1423	2.79102	-0.447905	2.86248	2.52483
-6.08045	-10.2058	19.6458	2.64457	-5.65226	-13.6464	-7.1638	1.36383	-11.6522	-13.7671	17.4506	-11.4308	-10.3349	-8.30453	-5.80359	-4.91369	-9.51416	-15.3643	4.31328	-1.9504	-14.7691	-17.3628	0.347235	5.36189	-9.04924	-12.6886	9.00111	13.6167	-13.5536	-14.9623	-1.28035	-2.42983	-7.46824	-11.366	5.5605	4.66575	-9.69511	-13.9817	-3.62673	5.52358	-8.6136	-11.402	5.64348	-7.27391	-9.67117	-13.0047	4.00796	0.470694	2.84351	2.56165
-6.8911	-10.9305	21.1732	4.80191	-6.83917	-14.5536	-5.80163	3.11048	-12.563	-14.6332	18.6529	-14.8928	-11.2962	-9.12209	-7.94948	-3.5251	-10.5772	-16.2236	6.00525	-0.10455	-15.6524	-18.2151	2.35301	7.23389	-9.7644	-13.4213	10.9082	15.2159	-14.2874	-15.749	-1.49941	-1.59725	-8.20928	-12.0548	6.9991	6.2541	-10.6583	-14.7693	-0.188498	6.90888	-9.64147	-12.3018	7.7027	-6.56222	-10.58	-13.8158	5.30503	1.53121	2.80524	2.58681
-7.54648	-11.5867	22.478	6.84024	-8.03073	-15.433	-4.21243	4.72585	-13.3982	-15.4271	19.7283	-17.1377	-12.2081	-9.90494	-9.35045	-1.99772	-11.593	-17.0087	7.84112	1.69343	-16.4749	-19.0086	4.24634	8.90999	-10.4153	-14.0585	12.482	16.9783	-14.913	-16.4433	-1.29293	-0.607891	-8.91855	-12.7141	8.39384	7.77659	-11.5395	-15.4766	2.64055	8.26795	-10.6242	-13.1956	9.79609	-5.36675	-11.4238	-14.5688	6.61367	2.73476	2.76987	2.60225
-8.3495	-12.1776	23.6346	8.74532	-9.19066	-16.2794	-2.53574	6.23897	-14.1426	-16.1332	20.7753	-17.9356	-13.0589	-10.6383	-9.89964	-0.375889	-12.5416	-17.7053	9.73433	3.75841	-17.2271	-19.7428	5.98962	10.4531	-10.9999	-14.5857	13.7462	18.8823	-15.4209	-17.0512	-0.744636	0.471234	-9.59858	-13.336	9.75213	9.23407	-12.337	-16.102	4.77443	9.63106	-11.553	-14.0718	11.8148	-3.77818	-12.22	-15.2567	7.91285	4.12043	2.69809	2.61196
-8.80672	-12.6969	24.7176	10.5187	-10.2858	-17.0867	-0.867536	7.68355	-14.7822	-16.7393	21.8846	-17.31	-13.836	-11.3084	-9.59646	1.30319	-13.4018	-18.298	11.6033	5.76179	-17.8991	-20.4163	7.56398	11.916	-11.5181	-14.989	14.7568	20.8897	-15.7944	-17.5783	0.054658	1.59696	-10.2435	-13.9075	11.0751	10.6349	-13.0512	-16.6418	6.39841	11.0126	-12.4183	-14.9182	13.6549	-1.88272	-12.9125	-15.8709	9.20413	5.64769	2.66172	2.62155
-9.29542	-13.1294	25.7803	12.1729	-11.2888	-17.8503	0.735854	9.08768	-15.3021	-17.2332	23.0751	-15.5129	-14.5265	-11.9043	-8.54998	3.00338	-14.1532	-18.7695	13.3746	7.81486	-18.474	-21.0209	8.96145	13.3671	-11.9706	-15.2571	15.5805	22.9772	-16.0087	-18.0278	1.02049	2.74561	-10.8389	-14.4127	12.3622	11.9962	-13.6803	-17.0904	7.7463	12.4332	-13.2135	-15.7221	15.2482	0.236625	-13.5229	-16.4016	10.485	7.30198	2.60499	2.63656
-9.67643	-13.4545	26.8459	13.7246	-12.1794	-18.5678	2.24213	10.4716	-15.6856	-17.6014	24.3247	-12.9065	-15.1206	-12.4197	-6.94893	4.69139	-14.776	-19.1018	14.9864	9.74582	-18.926	-21.5358	10.1761	14.9304	-12.3575	-15.3855	16.2932	25.2144	-16.0448	-18.3962	2.08292	3.90646	-11.3631	-14.8331	13.6198	13.337	-14.2173	-17.4393	9.0233	13.9355	-13.9322	-16.4697	16.5883	2.49721	-14.0254	-16.8368	11.7485	9.0498	2.54655	2.66069
-9.97891	-13.6483	27.9045	15.1894	-12.9436	-19.2329	3.63073	11.8455	-15.913	-17.8312	25.7088	-9.85868	-15.6098	-12.8526	-5.01573	6.34204	-15.2501	-19.2781	16.3924	11.4533	-19.2212	-21.9235	11.2007	16.7573	-12.6738	-15.3738	16.974	27.7955	-15.8974	-18.6672	3.19029	5.07342	-11.7875	-15.1456	14.8634	14.672	-14.6488	-17.6773	10.4225	15.5764	-14.5649	-17.1427	17.732	4.81452	-14.4081	-17.1612	13.0003	10.8782	2.48037	2.69441
-10.0784	-13.6872	28.9238	16.5786	-13.572	-19.8303	4.89205	13.2016	-15.9614	-17.9103	27.4619	-6.67584	-15.9845	-13.2021	-2.95163	7.94473	-15.5542	-19.2838	17.5653	12.9662	-19.3197	-22.1324	12.0344	18.9729	-12.907	-15.2147	17.6971	30.8532	-15.5678	-18.8159	4.3112	6.24077	-12.074	-15.3231	16.1107	16.0033	-14.9551	-17.7906	12.077	17.4034	-15.0989	-17.7162	18.7709	7.10634	-14.643	-17.3551	14.263	12.7814	2.42893	2.73574
-10.0608	-13.5517	29.8802	17.8977	-14.0558	-20.3347	6.02994	14.5099	-15.8069	-17.8252	29.8062	-3.55307	-16.2306	-13.4622	-0.896379	9.50785	-15.6666	-19.1078	18.4988	14.2786	-19.1759	-22.1064	12.6945	21.6795	-13.0384	-14.8889	18.5312	34.1374	-15.0628	-18.8146	5.43704	7.40245	-12.1752	-15.337	17.374	17.3097	-15.1109	-17.7618	14.001	19.4459	-15.516	-18.157	19.7976	9.303	-14.7182	-17.3952	15.5594	14.7199	2.37849	2.78284
-9.84699	-13.2287	30.7979	19.1458	-14.3823	-20.7136	7.06238	15.721	-15.4279	-17.5621	32.5678	-0.581938	-16.3269	-13.6182	1.07521	11.0554	-15.5664	-18.7427	19.2108	15.293	-18.7457	-21.7976	13.2223	24.9797	-13.0441	-14.3686	19.5409	36.9934	-14.3998	-18.6376	6.57906	8.55161	-12.0445	-15.1605	18.6459	18.5403	-15.0873	-17.5696	16.0965	21.7332	-15.7875	-18.4257	20.8845	11.3549	-14.6054	-17.2568	16.8803	16.617	2.3466	2.83623
-9.42653	-12.7111	31.7726	20.3186	-14.5336	-20.9319	8.02402	16.7821	-14.8082	-17.1074	35.0316	2.19989	-16.2442	-13.6446	2.93616	12.6127	-15.2358	-18.1848	19.7463	16.0435	-17.9991	-21.1744	13.6827	28.9203	-12.8961	-13.6253	20.7917	38.9033	-13.6074	-18.2662	7.75714	9.67752	-11.6456	-14.7736	19.8949	19.6292	-14.8556	-17.1893	18.2269	24.3024	-15.8743	-18.4822	22.0679	13.2317	-14.2842	-16.9173	18.1756	18.4201	2.33843	2.89932
-8.90622	-11.9957	32.9549	21.4123	-14.4879	-20.9522	8.96719	17.6623	-13.9404	-16.4484	36.4339	4.76053	-15.9474	-13.5073	4.68817	14.1913	-14.6632	-17.4317	20.1742	16.7524	-16.9324	-20.2251	14.1593	33.1975	-12.5656	-12.6392	22.3499	39.7997	-12.7194	-17.6875	8.98918	10.7709	-10.9603	-14.1676	21.0837	20.5312	-14.3915	-16.5974	20.2689	27.0725	-15.7327	-18.2922	23.34	14.9162	-13.7497	-16.3586	19.4009	20.097	2.33288	2.9761
-8.17085	-11.0833	34.4721	22.4314	-14.2236	-20.7374	9.95107	18.379	-12.8281	-15.5765	36.5602	7.0583	-15.4019	-13.1697	6.35263	15.7828	-13.8482	-16.4804	20.5739	17.0416	-15.5693	-18.9585	14.7395	36.998	-12.0271	-11.4051	24.265	39.8484	-11.7644	-16.8912	10.2836	11.832	-9.99762	-13.3461	22.1978	21.2617	-13.6812	-15.778	22.1166	29.6709	-15.3245	-17.8335	24.6555	16.3994	-12.9852	-15.5691	20.5607	21.5185	2.35138	3.06773
-7.10874	-9.98029	36.3058	23.4015	-13.7203	-20.2554	11.023	19.0167	-11.4881	-14.4896	35.7291	9.05822	-14.5832	-12.6007	7.96441	17.3568	-12.8023	-15.3274	21.0221	17.2875	-13.9502	-17.4031	15.4891	39.6313	-11.2652	-9.93514	26.5041	39.225	-10.7564	-15.8697	11.6348	12.8677	-8.79655	-12.323	23.2683	21.9261	-12.726	-14.7273	23.7367	31.5645	-14.6274	-17.0994	25.9505	17.6791	-11.9841	-14.5464	21.6934	22.6377	2.40919	3.17034
-5.92778	-8.6999	38.2194	24.3813	-12.9544	-19.4818	12.2007	19.7211	-9.95036	-13.1935	34.3958	10.7547	-13.4845	-11.7811	9.55681	18.8664	-11.5443	-13.9759	21.5836	17.1747	-12.1235	-15.6036	16.4354	41.1083	-10.2793	-8.25897	28.8415	38.0667	-9.69097	-14.6258	13.0274	13.8865	-7.41254	-11.118	24.3776	22.7144	-11.547	-13.4556	25.2479	32.4689	-13.6435	-16.1003	27.1762	18.7624	-10.778	-13.2995	22.8238	23.4459	2.45415	3.27496
-4.5632	-7.26091	39.8437	25.4646	-11.8994	-18.4024	13.4631	20.6579	-8.252	-11.7027	32.83	12.1744	-12.1175	-10.7064	11.1473	20.2595	-10.0956	-12.4411	22.3047	16.6652	-10.1366	-13.6133	17.5816	41.8801	-9.08222	-6.41744	30.8413	36.5046	-8.54843	-13.1749	14.4449	14.8931	-5.89792	-9.75235	25.6229	23.8322	-10.1819	-11.9866	26.9435	32.4881	-12.3987	-14.8578	28.3357	19.6705	-9.3794	-11.8469	23.9417	24.0446	2.49119	3.36919
-3.27938	-5.68632	40.8728	26.7655	-10.5436	-17.0181	14.7522	21.9347	-6.43297	-10.0424	31.0557	13.3707	-10.5088	-9.38783	12.7329	21.4832	-8.47917	-10.747	23.2114	16.2486	-8.02807	-11.4831	18.9386	42.3764	-7.69775	-4.45355	32.1019	34.6689	-7.28863	-11.5417	15.875	15.8845	-4.29074	-8.2469	27.0333	25.373	-8.67658	-10.3527	29.1171	31.9153	-10.9321	-13.3957	29.4982	20.4378	-7.83253	-10.2141	25.0172	24.5871	2.46651	3.44034
-1.69115	-4.00115	41.1953	28.3798	-8.91472	-15.3509	15.9879	23.5142	-4.53206	-8.24891	29.0131	14.4143	-8.69704	-7.85289	14.2933	22.487	-6.71883	-8.92171	24.31	15.8506	-5.82611	-9.25388	20.5466	42.7298	-6.15803	-2.40385	32.5161	32.6504	-5.85142	-9.75387	17.3088	16.8485	-2.61574	-6.62136	28.4733	27.1987	-7.07301	-8.58889	31.703	31.0094	-9.2833	-11.7374	30.7667	21.1047	-6.12377	-8.43043	26.0104	25.108	2.45562	3.47997
-0.141957	-2.23103	40.8821	30.3227	-7.07441	-13.4438	17.0938	25.1981	-2.58216	-6.36545	26.7045	15.3802	-6.72776	-6.14348	15.7951	23.2384	-4.83866	-6.99389	25.5867	15.5979	-3.55195	-6.95526	22.4643	42.8223	-4.4975	-0.29493	32.2171	30.4793	-4.19399	-7.83561	18.7394	17.7697	-0.88892	-4.89195	29.6379	28.953	-5.40049	-6.72655	34.0837	29.8891	-7.4836	-9.90696	32.1853	21.7109	-4.3074	-6.52626	26.8536	25.5783	2.40235	3.48655
1.45007	-0.40165	40.0864	32.4681	-5.08745	-11.3517	18.0267	26.7186	-0.607459	-4.43537	24.2125	16.3239	-4.64889	-4.3088	17.1896	23.7404	-2.86312	-4.99164	26.9998	15.7335	-1.2208	-4.60773	24.724	42.5657	-2.74577	1.85313	31.3861	28.1468	-2.31883	-5.80442	20.1597	18.6386	0.87945	-3.07323	30.1997	30.2327	-3.67716	-4.79098	35.4622	28.5491	-5.55553	-7.93019	33.6524	22.2854	-2.39959	-4.53114	27.4636	25.9457	2.33218	3.46375
3.25028	1.46189	38.9472	34.5488	-3.00455	-9.1303	18.7988	27.8629	1.37628	-2.49437	21.664	17.2739	-2.5066	-2.39636	18.4045	24.0409	-0.816548	-2.94118	28.4655	16.0625	1.1583	-2.2254	27.2569	41.9387	-0.925562	4.01967	30.1547	25.6385	-0.265693	-3.67118	21.5641	19.4666	2.68127	-1.18067	29.9716	30.7725	-1.91519	-2.80009	35.4166	26.9475	-3.52048	-5.83388	34.9402	22.8424	-0.408044	-2.47199	27.7804	26.1268	2.28307	3.41691
4.9492	3.3375	37.5504	36.2496	-0.861981	-6.82883	19.484	28.5395	3.35923	-0.565827	19.1605	18.2843	-0.34062	-0.445725	19.3478	24.236	1.27584	-0.865898	29.8462	16.7528	3.57961	0.183093	29.8162	40.9164	0.942733	6.18002	28.6012	22.9561	1.89924	-1.44468	22.9538	20.3017	4.50623	0.769471	28.9536	30.5066	-0.122265	-0.766362	34.0375	25.0708	-1.40195	-3.64603	35.8179	23.3903	1.61684	-0.372115	27.779	26.1095	2.21598	3.35117
6.70571	5.20756	35.9411	37.3411	1.31434	-4.48819	20.2025	28.7638	5.33223	1.33861	16.7453	19.5103	1.81993	1.51303	19.946	24.4631	3.38828	1.21485	30.9727	16.8066	6.03591	2.61259	32.0127	39.517	2.83879	8.30821	26.7818	20.1241	4.0943	0.860311	24.3433	21.2348	6.33902	2.76093	27.2818	29.5257	1.69836	1.29883	31.7524	22.9393	0.775696	-1.39811	36.188	23.9499	3.66751	1.74806	27.4698	25.8341	2.16532	3.27205
8.41194	7.05905	34.1509	37.7579	3.50552	-2.14018	21.0778	28.6056	7.2842	3.21305	14.4218	21.1982	3.95596	3.45724	20.1944	24.8765	5.49605	3.28455	31.7042	17.0301	8.5138	5.05588	33.5043	37.8087	4.74345	10.3805	24.7646	17.1962	6.25174	3.21955	25.7589	22.3811	8.16241	4.77622	25.1488	28.0061	3.54587	3.38079	29.0107	20.5955	2.98883	0.875585	36.1114	24.5663	5.71452	3.8693	26.8953	25.4566	2.12019	3.1856
10.1004	8.88266	32.2087	37.5748	5.69966	0.191324	22.177	28.139	9.20464	5.05147	12.1965	23.4834	6.05457	5.36995	20.1935	25.6082	7.57895	5.32753	31.9783	17.0956	10.9907	7.49734	34.1725	35.8399	6.63934	12.3792	22.6366	14.2489	8.33651	5.5997	27.2259	23.8311	9.96336	6.79688	22.743	26.136	5.41865	5.45975	26.1289	18.0914	5.21542	3.14248	35.7213	25.3138	7.74565	5.97257	26.1257	25.0329	2.08771	3.09805
11.6694	10.6721	30.14	36.9257	7.8894	2.48854	23.4545	27.4155	11.087	6.84483	10.0868	26.1159	8.10507	7.23929	20.1565	26.7	9.62171	7.3285	31.8161	17.5509	13.4345	9.91447	34.1367	33.625	8.51187	14.2938	20.4762	11.3649	10.3379	7.96441	28.7457	25.5843	11.7353	8.80555	20.2111	24.0571	7.31287	7.51191	23.2508	15.4801	7.43528	5.37405	35.1441	26.2823	9.74003	8.03976	25.238	24.6456	2.05786	3.01535
13.3552	12.4226	27.9661	35.9395	10.063	4.73657	24.7344	26.4673	12.9267	8.58186	8.09958	28.5216	10.0992	9.059	20.3719	28.0484	11.6119	9.27285	31.2874	19.495	15.8083	12.2811	33.6483	31.1644	10.3488	16.1207	18.3342	8.62431	12.257	10.2815	30.2776	27.5169	13.4757	10.7845	17.6495	21.8482	9.22256	9.51141	20.3046	12.817	9.62895	7.54656	34.472	27.5294	11.7089	10.0544	24.286	24.3611	2.05154	2.94253
15.0285	14.1302	25.7056	34.7152	12.1988	6.92117	25.7672	25.3207	14.7151	10.2527	6.22185	30.2047	12.0335	10.8266	21.0913	29.4222	13.5378	11.1492	30.47	22.9443	18.0776	14.5715	32.9682	28.458	12.1392	17.8592	16.2274	6.08456	14.1025	12.525	31.7314	29.4059	15.184	12.711	15.1289	19.5429	11.1384	11.4363	17.1637	10.1628	11.7789	9.6412	33.7586	29.0133	13.6304	12.0022	23.294	24.1159	2.04977	2.88257
16.6523	15.7917	23.3807	33.3187	14.274	9.02871	26.3443	23.9986	16.4383	11.8518	4.42907	31.033	13.9085	12.54	22.3511	30.4365	15.3852	12.9525	29.4261	27.4319	20.2152	16.7612	32.2705	25.4995	13.8728	19.5085	14.1489	3.75672	15.8865	14.6744	32.9783	31.0186	16.8609	14.5585	12.7125	17.1603	13.046	13.2742	13.8537	7.57344	13.8708	11.6433	33.018	30.5663	15.4919	13.8714	22.2648	23.7994	2.04488	2.83551
18.1225	17.4046	21.0304	31.7883	16.2732	11.0459	26.3906	22.5116	18.0834	13.3766	2.70894	31.1956	15.7263	14.1961	23.8699	30.9469	17.1388	14.6816	28.1988	30.9214	22.2019	18.8316	31.6102	22.2867	15.5422	21.0661	12.0887	1.619	17.6191	16.7138	33.8816	32.0913	18.5059	16.3029	10.4541	14.728	14.9273	15.0215	10.5756	5.08395	15.8919	13.5413	32.2348	31.9548	17.2757	15.6529	21.1858	23.1934	2.02798	2.79917
19.5253	18.967	18.7145	30.1428	18.1869	12.9596	25.9633	20.8496	19.6396	14.8239	1.06132	30.9394	17.4865	15.7887	25.1741	30.9243	18.7862	16.3334	26.8224	32.0346	24.0288	20.7722	30.9646	18.8397	17.1456	22.5282	10.0438	-0.354792	19.3061	18.632	34.3418	32.2466	20.1158	17.9291	8.38014	12.2865	16.7652	16.6786	7.55452	2.70063	17.8287	15.328	31.3869	32.9882	18.9832	17.3401	20.037	22.1452	2.00281	2.77101
21.0448	20.4757	16.4997	28.3921	20.0079	14.7581	25.1845	18.9821	21.0985	16.1868	-0.515846	30.3928	19.1832	17.3087	25.8669	30.4023	20.3212	17.9009	25.3269	32.1584	25.6945	22.5769	30.2828	15.1977	18.6852	23.8903	8.02569	-2.18648	20.9486	20.4223	34.3339	31.595	21.6856	19.4344	6.48551	9.88411	18.5472	18.2468	4.91257	0.410854	19.6667	17.0005	30.458	33.5887	20.6258	18.9274	18.8055	20.8016	1.97181	2.74923
22.3331	21.9254	14.4367	26.5439	21.7321	16.4331	24.1637	16.873	22.4552	17.4563	-2.01969	29.5769	20.8043	18.7446	25.7848	29.4441	21.7416	19.3733	23.736	31.6225	27.2004	24.2426	29.5159	11.4037	20.1636	25.1475	6.05689	-3.89586	22.5402	22.082	33.9154	30.9225	23.2082	20.826	4.75545	7.57235	20.2638	19.725	2.63967	-1.80101	21.3935	18.559	29.4407	33.7692	22.1669	20.4104	17.4932	19.2756	1.92693	2.73281
23.6282	23.3078	12.5436	24.6046	23.354	17.9789	22.9567	14.4985	23.7076	18.6255	-3.44808	28.4977	22.3353	20.0832	24.9634	28.1201	23.0471	20.7412	22.0683	30.6895	28.5481	25.7693	28.6327	7.51905	21.5815	26.2947	4.15896	-5.50847	24.0665	23.6109	33.1964	30.533	24.6744	22.1124	3.16753	5.39761	21.906	21.1096	0.64811	-3.94298	23.0019	20.0042	28.3223	33.5681	23.6228	21.7852	16.11	17.6342	1.8743	2.72128
24.8541	24.6124	10.8064	22.5821	24.8616	19.3916	21.5711	11.8584	24.8546	19.693	-4.80917	27.217	23.7639	21.311	23.5552	26.4957	24.2374	22.0005	20.3395	30.012	29.7381	27.1586	27.6262	3.62743	22.9352	27.3281	2.34039	-7.05675	25.5092	25.0116	32.2925	29.9557	26.0727	23.2997	1.67936	3.38784	23.4627	22.3945	-1.17042	-6.01442	24.4922	21.3344	27.0705	33.0064	24.9802	23.0487	14.6638	15.9156	1.81413	2.71452
25.9116	25.8288	9.18771	20.4894	26.2381	20.6696	19.9904	8.97944	25.8939	20.6582	-6.13241	25.8475	25.0815	22.4155	21.7614	24.6279	25.3134	23.1499	18.5601	29.224	30.7707	28.4102	26.499	-0.190174	24.2167	28.2442	0.591685	-8.57207	26.8484	26.291	31.2856	29.1997	27.3921	24.3903	0.242032	1.53951	24.9191	23.5733	-2.90155	-8.01167	25.8706	22.5439	25.6529	32.0818	26.2233	24.1977	13.1579	14.1105	1.75001	2.71245
27.0275	26.947	7.63872	18.3436	27.4729	21.8131	18.1961	5.91455	26.8208	21.5178	-7.46928	24.4857	26.2791	23.386	19.7354	22.5666	26.2779	24.1872	16.7356	28.3394	31.6455	29.5191	25.2385	-3.866	25.4123	29.0404	-1.10264	-10.0798	28.0645	27.4592	30.2096	28.2186	28.6248	25.3848	-1.17703	-0.183687	26.2584	24.6403	-4.61196	-9.94289	27.1441	23.6272	24.0516	30.7866	27.3662	25.2293	11.5859	12.2348	1.68132	2.7151
27.886	27.9584	6.11515	16.1635	28.5655	22.822	16.177	2.73766	27.6241	22.2659	-8.84571	23.1508	27.3456	24.2136	17.5405	20.3544	27.1365	25.107	14.874	27.4598	32.3593	30.4759	23.8051	-7.34948	26.5031	29.7129	-2.75912	-11.5973	29.1421	28.5257	29.0647	26.9926	29.7633	26.2834	-2.59389	-1.84004	27.4624	25.5912	-6.3852	-11.8357	28.3167	24.5814	22.2577	29.13	28.3731	26.1398	9.93184	10.306	1.61752	2.72232
29.0494	28.8558	4.58996	13.969	29.5151	23.6956	13.9287	-0.471185	28.287	22.8972	-10.259	21.788	28.267	24.8908	15.1917	18.024	27.8969	25.8995	12.9934	26.0369	32.9038	31.2709	22.141	-10.6131	27.468	30.2557	-4.40337	-13.125	30.0768	29.4942	27.8435	25.5281	30.7982	27.0863	-4.01825	-3.49066	28.511	26.4218	-8.26875	-13.6969	29.3847	25.4051	20.2698	27.1542	29.2871	26.9248	8.1826	8.28212	1.54889	2.73387
29.7368	29.6346	3.06083	11.7791	30.312	24.4315	11.4585	-3.63816	28.7927	23.4077	-11.6889	20.3152	29.0283	25.4118	12.7084	15.5993	28.5673	26.5521	11.1227	24.157	33.2686	31.8969	20.1961	-13.6285	28.2877	30.6619	-6.06614	-14.6365	30.8769	30.3586	26.4743	23.8459	31.7169	27.7938	-5.45526	-5.1788	29.3839	27.1287	-10.2225	-15.5028	30.3354	26.095	18.0929	24.9277	30.0279	27.5793	6.33463	6.18541	1.4979	2.74973
30.3372	30.2929	1.54801	9.61055	30.9404	25.0258	8.79662	-6.70144	29.1286	23.792	-13.1092	18.6741	29.6156	25.7736	10.1332	13.0944	29.1516	27.0521	9.29653	22.5377	33.4476	32.3508	17.9594	-16.3598	28.9467	30.9233	-7.7635	-16.0988	31.5552	31.1092	24.7141	21.9865	32.505	28.4063	-6.90576	-6.92068	30.0645	27.7097	-12.1741	-17.2287	31.15	26.6468	15.7301	22.54	30.622	28.0984	4.38412	4.10307	1.46234	2.77095
30.7879	30.8317	0.077661	7.47713	31.3862	25.4757	6.00099	-9.61275	29.289	24.0438	-14.488	16.8478	30.0188	25.9755	7.5126	10.5049	29.6468	27.3888	7.54829	20.9281	33.4457	32.6327	15.4687	-18.7889	29.4357	31.0323	-9.48944	-17.4983	32.1225	31.7408	22.7726	20.0053	33.1483	28.9254	-8.37126	-8.71244	30.5427	28.1627	-14.0623	-18.8661	31.807	27.0621	13.1785	20.0592	31.0573	28.4792	2.37714	2.03127	1.45065	2.80001
30.9351	31.2546	-1.33786	5.39233	31.6409	25.7815	3.15518	-12.3352	29.277	24.1582	-15.7962	14.8275	30.2328	26.0188	4.88229	7.94237	30.0435	27.5562	5.9015	19.2814	33.282	32.7448	12.7999	-20.9376	29.7546	30.9865	-11.2182	-18.8373	32.5854	32.2552	20.7645	17.9329	33.6354	29.3546	-9.85683	-10.5394	30.8153	28.4849	-15.8518	-20.4187	32.2838	27.3512	10.4344	17.4955	31.3169	28.7224	0.352441	-0.0178371	1.4725	2.84051
31.2542	31.5674	-2.69469	3.374	31.7	25.954	0.356468	-14.8424	29.1039	24.1357	-17.0198	12.5882	30.2594	25.9094	2.27491	5.4472	30.3278	27.5536	4.36473	17.6215	32.9858	32.6869	10.0404	-22.8578	29.9085	30.7918	-12.9158	-20.1211	32.9457	32.6611	18.6876	15.7445	33.9615	29.6983	-11.3667	-12.3819	30.8893	28.6753	-17.522	-21.897	32.5595	27.5301	7.50199	14.8354	31.445	28.833	-1.66298	-2.04448	1.52009	2.89534
31.3197	31.7789	-3.98146	1.44783	31.5631	26.0192	-2.30529	-17.1195	28.7875	23.9852	-18.1552	10.1077	30.1075	25.6611	-0.264202	3.03922	30.4861	27.3862	2.93374	15.8202	32.59	32.4577	7.26549	-24.6275	29.9044	30.4629	-14.5587	-21.3437	33.2069	32.9696	16.5587	13.4077	34.1302	29.9599	-12.8976	-14.2249	30.7851	28.7387	-19.0667	-23.3108	32.6223	27.6178	4.4115	12.0495	31.4093	28.8216	-3.6418	-4.06857	1.60021	2.96499
31.2798	31.8993	-5.17228	-0.351546	31.2401	26.0133	-4.76286	-19.161	28.352	23.7269	-19.2026	7.40028	29.7929	25.2984	-2.67688	0.779567	30.5091	27.0659	1.59283	13.8431	32.126	32.0632	4.53237	-26.3116	29.7524	30.0229	-16.1351	-22.4794	33.3781	33.1918	14.3986	10.9324	34.1529	30.1409	-14.4329	-16.0573	30.5343	28.6876	-20.4913	-24.6626	32.4752	27.6338	1.23426	9.13338	31.2357	28.704	-5.55599	-6.08497	1.70435	3.04758
30.9999	31.9386	-6.22429	-1.98095	30.7566	25.9752	-6.9735	-20.9647	27.8302	23.3919	-20.1638	4.53661	29.3399	24.8549	-4.90308	-1.26319	30.3937	26.6157	0.317906	11.783	31.6251	31.5231	1.88855	-27.9338	29.4683	29.5013	-17.6265	-23.4806	33.4709	33.3387	12.2333	8.35837	34.0447	30.2443	-15.9401	-17.8592	30.173	28.5408	-21.7828	-25.9463	32.1395	27.5975	-1.92366	6.14355	30.9311	28.502	-7.37255	-8.05521	1.8241	3.13915
30.8181	31.9049	-7.08238	-3.39225	30.154	25.9413	-8.91673	-22.5301	27.2654	23.0194	-21.0246	1.63235	28.7796	24.3701	-6.88707	-3.0439	30.1457	26.0707	-0.915936	9.94499	31.1195	30.8721	-0.619114	-29.4961	29.074	28.934	-18.9956	-24.2599	33.4994	33.4216	10.0976	5.73877	33.8209	30.2784	-17.3754	-19.5862	29.7353	28.3197	-22.9034	-27.1324	31.6543	27.527	-4.94849	3.18118	30.5515	28.2417	-9.05191	-9.90396	1.95189	3.23391
30.5143	31.8036	-7.68722	-4.53942	29.4886	25.9402	-10.5915	-23.8605	26.706	22.65	-21.7494	-1.20591	28.1455	23.8852	-8.58701	-4.5469	29.7798	25.4747	-2.12629	7.99525	30.6427	30.1576	-2.94354	-30.9851	28.5999	28.3626	-20.1822	-24.7151	33.4795	33.4553	8.03104	3.13522	33.4961	30.2561	-18.6825	-21.1694	29.2492	28.0457	-23.7921	-28.1547	31.0727	27.4371	-7.73304	0.361316	30.1068	27.9516	-10.5494	-11.6077	2.0774	3.32524
30.2413	31.6371	-7.98699	-5.38666	28.8272	25.9915	-12.0118	-24.966	26.1974	22.3195	-22.2797	-3.91026	27.4699	23.4366	-9.9865	-5.78031	29.3194	24.8754	-3.3175	6.33685	30.2247	29.4334	-5.04394	-32.3301	28.0816	27.8323	-21.1082	-24.7846	33.4281	33.4588	6.07054	0.615975	33.0867	30.1919	-19.7921	-22.5308	28.7351	27.7391	-24.3814	-28.9184	30.4553	27.3381	-10.1828	-2.21557	29.6424	27.6594	-11.82	-13.0791	2.19474	3.40638
29.8358	31.4063	-7.95075	-5.91371	28.2392	26.1062	-13.1984	-25.8655	25.7735	22.0539	-22.5175	-6.43882	26.7884	23.0525	-11.0902	-6.7694	28.7982	24.3219	-4.47831	4.67559	29.8842	28.749	-6.89209	-33.374	27.5545	27.3821	-21.685	-24.4649	33.3598	33.4521	4.24587	-1.75009	32.612	30.1008	-20.6265	-23.5917	28.2114	27.418	-24.6532	-29.3346	29.8631	27.2375	-12.2301	-4.48194	29.1745	27.3891	-12.8251	-14.3008	2.29296	3.47057
29.4929	31.11	-7.57793	-6.11891	27.7855	26.2838	-14.173	-26.5882	25.4515	21.864	-22.3353	-8.76948	26.1439	22.7549	-11.9132	-7.54703	28.2619	23.8578	-5.5841	3.16754	29.6245	28.1376	-8.47504	-33.9097	27.0526	27.03	-21.8304	-23.7919	33.2814	33.45	2.57542	-3.90899	32.0965	29.9975	-21.112	-24.2766	27.6987	27.0954	-24.6708	-29.3613	29.3512	27.1411	-13.8476	-6.40932	28.7491	27.1565	-13.5404	-15.2285	2.37146	3.51167
29.3017	30.7434	-6.89972	-6.021	27.5069	26.5085	-14.9576	-27.1689	25.2294	21.7457	-21.6193	-10.8815	25.5737	22.5601	-12.4811	-8.14685	27.7619	23.5114	-6.60327	1.19462	29.4304	27.6087	-9.7962	-33.7805	26.6104	26.7628	-21.5037	-22.8032	33.1896	33.4575	1.06268	-5.83521	31.5682	29.8933	-21.2023	-24.5319	27.2157	26.7779	-24.5326	-29.0007	28.9612	27.0502	-15.0543	-8.00832	28.3954	26.9654	-13.9625	-15.9076	2.42937	3.52536
29.0943	30.2991	-5.96833	-5.66084	27.413	26.7499	-15.5809	-27.6429	25.0875	21.6807	-20.3324	-12.7522	25.0933	22.4736	-12.8408	-8.6015	27.3406	23.2852	-7.50645	-0.565606	29.2679	27.1484	-10.8795	-32.9733	26.2556	26.5443	-20.7351	-21.5209	33.0681	33.4654	-0.305128	-7.53573	31.0537	29.7898	-20.9046	-24.3536	26.7715	26.465	-24.284	-28.2753	28.7145	26.9603	-15.9129	-9.32345	28.1054	26.8056	-14.1136	-16.2914	2.45902	3.51022
29.0612	29.7697	-4.85149	-5.10288	27.4764	26.9644	-16.0837	-28.0443	24.9905	21.6406	-18.551	-14.3925	24.6947	22.4807	-13.0598	-8.94594	27.0169	23.1578	-8.27182	-2.54408	29.0878	26.7278	-11.7758	-31.6228	25.9992	26.3363	-19.6209	-19.9825	32.8882	33.4499	-1.55655	-9.05255	30.5697	29.6758	-20.2951	-23.8131	26.3622	26.1482	-23.9012	-27.2313	28.61	26.8626	-16.5225	-10.4268	27.887	26.6558	-14.0445	-16.469	2.46874	3.46842
28.9395	29.1523	-3.63836	-4.43807	27.6367	27.1024	-16.52	-28.4081	24.8929	21.5908	-16.4842	-15.8771	24.3501	22.5438	-13.2108	-9.22578	26.7827	23.0929	-8.88444	-4.62102	28.84	26.312	-12.5665	-29.9797	25.8285	26.1111	-18.306	-18.2867	32.6164	33.3771	-2.73553	-10.4614	30.1137	29.5301	-19.5123	-23.067	25.9708	25.8114	-23.3996	-25.9895	28.6251	26.7471	-17.0044	-11.4135	27.6906	26.4883	-13.842	-16.5244	2.45208	3.4052
[truncated: 2 more columns]

## Sheet: SHANK
SUB1				SUB2				SUB3				SUB4				SUB5				SUB6				SUB7				SUB8				SUB9				SUB10				SUB11				MEAN				SD
gait	gait_sleeve	onehop	onehop_sleeve	gait	gait_sleeve	onehop	onehop_sleeve	gait	gait_sleeve	onehop	onehop_sleeve	gait	gait_sleeve	onehop	onehop_sleeve	gait	gait_sleeve	onehop	onehop_sleeve	gait	gait_sleeve	onehop	onehop_sleeve	gait	gait_sleeve	onehop	onehop_sleeve	gait	gait_sleeve	onehop	onehop_sleeve	gait	gait_sleeve	onehop	onehop_sleeve	gait	gait_sleeve	onehop	onehop_sleeve	gait	gait_sleeve	onehop	onehop_sleeve	gait	gait_sleeve	onehop	onehop_sleeve	gait	gait_sleeve
14.2301	15.9452	5.68981	6.02616	21.0191	25.1696	14.6018	16.171	17.8679	19.6013	11.8278	21.6842	20.8085	19.6321	6.4806	-1.42221	20.9368	23.7756	16.5956	13.2507	20.8162	23.1021	15.5837	24.9324	16.7381	19.7893	11.3995	9.16463	16.6523	19.9251	3.00331	9.10692	13.8482	19.0208	10.8712	16.9746	14.1711	19.2676	12.1921	13.9402	18.4702	17.9653	4.82944	-3.47887	17.778	20.2904	10.2795	11.4863	2.87703	2.68509
12.8209	15.0049	3.75942	4.76718	19.8212	23.7338	13.6959	15.2954	17.1357	18.6611	10.6737	20.9321	18.7843	18.1789	5.34199	-2.57236	20.2178	22.9063	15.2709	12.1955	19.5843	21.9634	13.21	24.0103	15.8003	18.8141	10.2227	7.38164	15.826	18.4257	1.61523	7.84659	12.9745	18.0868	9.38405	14.7615	14.804	18.834	11.5571	12.8071	18.0273	16.802	3.6125	-2.88837	16.8906	19.2192	8.94032	10.4124	2.6538	2.62163
11.2774	13.8751	1.76547	3.42586	18.5291	22.2436	12.6876	14.2934	16.0628	17.5091	9.24918	20.0966	16.8771	16.6328	4.14808	-3.72831	19.0852	21.6991	13.548	11.0377	18.1489	20.6683	10.8242	22.8927	14.6625	17.6059	8.93689	5.59065	14.7035	16.8538	0.181146	6.51663	11.9008	16.9352	7.78925	12.5124	15.2127	18.0338	10.9558	11.6753	17.0646	15.4173	2.36889	-2.42066	15.775	17.9522	7.49588	9.26294	2.55105	2.59203
9.85493	12.6259	-0.317585	1.94794	17.2335	20.8191	11.4994	13.0679	14.7826	16.2545	7.43993	19.0899	15.2001	15.1544	2.8661	-4.89203	17.666	20.2708	11.5276	9.4499	16.673	19.2951	8.43496	21.4441	13.4626	16.3208	7.48065	3.7582	13.4163	15.3534	-1.31681	5.07931	10.7469	15.6761	6.01167	10.2213	15.2241	16.9711	10.3595	10.5257	15.7712	13.9359	1.07687	-2.17877	14.5483	16.607	5.91476	7.95577	2.5063	2.57413
8.58017	11.2993	-2.48474	0.315859	15.9672	19.5003	10.0937	11.5661	13.3995	14.9716	5.33523	17.8221	13.8093	13.8389	1.48888	-6.07228	16.0742	18.7129	9.31957	7.63863	15.236	17.8654	6.04327	19.584	12.2702	15.0569	5.81985	1.81322	12.0481	13.9788	-2.8777	3.52551	9.58967	14.383	4.0135	7.89625	14.7522	15.7369	9.6635	9.28641	14.3315	12.4166	-0.286521	-2.23284	13.278	15.251	4.19351	6.46754	2.46305	2.55428
7.47976	9.90715	-4.71276	-1.45218	14.7121	18.2539	8.47366	9.78063	11.9679	13.6883	3.13318	16.2486	12.6734	12.6949	0.0370981	-7.28152	14.3934	17.0771	7.02457	5.59064	13.8338	16.3672	3.63351	17.2962	11.076	13.8407	3.95286	-0.274596	10.6265	12.6984	-4.48463	1.8688	8.44807	13.0813	1.79802	5.55027	13.798	14.3938	8.75952	7.87303	12.8759	10.8662	-1.74365	-2.61718	11.9895	13.8972	2.35194	4.78025	2.38095	2.53264
6.66305	8.44443	-6.97891	-3.3194	13.4249	17.0102	6.67472	7.73824	10.496	12.3904	0.986572	14.3965	11.6813	11.6616	-1.44897	-8.53157	12.6665	15.3779	4.71827	3.75086	12.4204	14.7847	1.18068	14.6464	9.82377	12.6467	1.92084	-2.47563	9.14551	11.4376	-6.11407	0.136017	7.29085	11.7609	-0.593417	3.19575	12.4296	12.9761	7.58011	6.23557	11.4515	9.27876	-3.30839	-3.33119	10.6812	12.5245	0.419766	2.94923	2.23411	2.51594
5.74881	6.91012	-9.27151	-5.25176	12.0658	15.7038	4.74805	5.48468	8.97304	11.0455	-1.0877	12.3643	10.6939	10.6553	-2.92195	-9.82965	10.9018	13.6137	2.44562	1.88112	10.9488	13.1144	-1.32587	11.7563	8.46247	11.433	-0.204086	-4.74894	7.59566	10.1255	-7.74571	-1.63843	6.06752	10.4025	-3.08819	0.851017	10.7524	11.5028	6.11844	4.38155	10.0338	7.66453	-4.97845	-4.34224	9.29491	11.1065	-1.57376	0.991634	2.1047	2.50675
4.54741	5.31789	-11.5868	-7.22957	10.6161	14.2994	2.73931	3.07087	7.39765	9.62863	-3.17095	10.2802	9.60141	9.60761	-4.34061	-11.1731	9.09438	11.7892	0.223362	0.145712	9.38975	11.3656	-3.86444	8.76724	6.98228	10.1679	-2.35548	-7.07286	5.98844	8.72434	-9.36814	-3.42015	4.74356	8.99869	-5.58767	-1.45506	8.88362	9.98982	4.43099	2.38074	8.56642	6.05559	-6.7354	-5.5939	7.801	9.63133	-3.60144	-1.02726	2.02912	2.49973
2.87909	3.69603	-13.9197	-9.24599	9.0824	12.7964	0.673946	0.543138	5.78898	8.13644	-5.32481	8.25202	8.35154	8.48337	-5.67984	-12.5463	7.24784	9.92585	-1.95626	-1.55277	7.73999	9.55876	-6.39323	5.77542	5.42205	8.83832	-4.49993	-9.44253	4.36187	7.23448	-10.9794	-5.18351	3.32019	7.56083	-7.9858	-3.69549	6.93409	8.45706	2.62548	0.32724	7.00695	4.49494	-8.5488	-7.01902	6.19409	8.1075	-5.6353	-3.07162	2.0266	2.48535
0.885941	2.08145	-16.2613	-11.2966	7.49339	11.2228	-1.44126	-2.05804	4.18201	6.58918	-7.52124	6.35066	6.95428	7.28402	-6.93985	-13.926	5.38649	8.0595	-4.12005	-3.31927	6.01915	7.72372	-8.8769	2.81232	3.85177	7.45273	-6.63819	-11.8515	2.76786	5.68838	-12.5842	-6.91613	1.8325	6.11584	-10.2035	-5.86461	4.99469	6.92806	0.812284	-1.70868	5.35415	3.02129	-10.3879	-8.55678	4.5202	6.56063	-7.6511	-5.12132	2.06751	2.4564
-0.704938	0.513468	-18.6044	-13.37	5.89	9.62318	-3.60422	-4.69285	2.61021	5.02359	-9.69434	4.61154	5.4736	6.0398	-8.1489	-15.2907	3.55226	6.23178	-6.30002	-5.08508	4.25914	5.89769	-11.3015	-0.13184	2.34227	6.03846	-8.78548	-14.281	1.25502	4.13703	-14.1916	-8.61936	0.337166	4.69826	-12.2176	-7.98179	3.12355	5.42497	-0.951568	-3.69896	3.64476	1.65885	-12.2346	-10.1646	2.88937	5.0261	-9.63948	-7.15497	2.02742	2.4116
-2.21135	-0.971957	-20.9437	-15.4485	4.31299	8.04572	-5.80483	-7.31853	1.09087	3.4799	-11.8384	3.02895	3.99844	4.79503	-9.3533	-16.629	1.78939	4.47888	-8.51526	-7.12905	2.50097	4.12186	-13.674	-3.07359	0.944315	4.63345	-10.9504	-16.7017	-0.144404	2.63162	-15.8112	-10.3032	-1.10408	3.34268	-14.0696	-10.0769	1.34396	3.96621	-2.68094	-5.66253	1.92946	0.417381	-14.0863	-11.8196	1.31369	3.54007	-11.6116	-9.19396	1.96986	2.35479
-3.65735	-2.34806	-23.2703	-17.5126	2.79793	6.53379	-8.02245	-9.88939	-0.374478	1.99181	-14.0168	1.56707	2.60066	3.59143	-10.5992	-17.9397	0.128636	2.82664	-10.7641	-9.08522	0.790719	2.43632	-16.0108	-5.98211	-0.318586	3.27614	-13.1207	-19.0851	-1.41795	1.21152	-17.4467	-11.9777	-2.44219	2.07698	-15.8447	-12.1712	-0.34317	2.56694	-4.43373	-7.65984	0.254458	-0.703067	-15.9421	-13.5112	-0.18012	2.13277	-13.5883	-11.2043	1.91447	2.29254
-4.97907	-3.6012	-25.565	-19.5439	1.37497	5.12249	-10.2285	-12.3596	-1.7888	0.582457	-16.2709	0.178716	1.31302	2.45792	-11.9115	-19.2257	-1.4174	1.29252	-13.0266	-11.2496	-0.82958	0.875936	-18.3216	-8.78408	-1.44658	1.99652	-15.2679	-21.4037	-2.56714	-0.097605	-19.0926	-13.6472	-3.65089	0.91761	-17.6308	-14.2691	-1.9397	1.23891	-6.25972	-9.76606	-1.34153	-1.70868	-17.7941	-15.2305	-1.57025	0.82517	-15.579	-13.2092	1.86425	2.23224
-6.18488	-4.73013	-27.8022	-21.5284	0.0681206	3.83501	-12.3901	-14.6914	-3.14937	-0.734641	-18.5758	-1.17486	0.139583	1.40916	-13.2829	-20.4902	-2.8472	-0.113563	-15.2709	-13.3203	-2.32703	-0.533019	-20.5962	-11.4267	-2.45352	0.811514	-17.3679	-23.6207	-3.59828	-1.28213	-20.736	-15.3076	-4.72729	-0.131601	-19.4832	-16.363	-3.43967	-0.0102003	-8.17896	-12.0391	-2.82837	-2.6092	-19.6226	-16.9638	-2.84981	-0.371709	-17.5733	-15.1751	1.83104	2.17972
-7.21196	-5.74337	-29.9589	-23.458	-1.10769	2.68084	-14.4761	-16.8626	-4.44577	-1.95271	-20.8885	-2.5101	-0.92457	0.448996	-14.6864	-21.7347	-4.1632	-1.39002	-17.4621	-15.4608	-3.67968	-1.77729	-22.8013	-13.9271	-3.35862	-0.274456	-19.4173	-25.6982	-4.51687	-2.33765	-22.3605	-16.9478	-5.68543	-1.07575	-21.4085	-18.4398	-4.83214	-1.17754	-10.1922	-14.4911	-4.18842	-3.41584	-21.3997	-18.6979	-4.0104	-1.45589	-19.5502	-17.1116	1.80871	2.1381
-8.19036	-6.6559	-32.0188	-25.329	-2.15187	1.65694	-16.4641	-18.865	-5.66304	-3.06927	-23.1968	-3.8244	-1.88387	-0.425583	-16.0961	-22.9605	-5.37086	-2.5432	-19.5717	-17.3114	-4.87941	-2.85974	-24.8958	-16.3366	-4.18158	-1.26609	-21.4316	-27.6017	-5.32839	-3.26766	-23.9513	-18.5536	-6.54652	-1.92485	-23.3696	-20.4808	-6.10827	-2.26581	-12.2847	-17.0821	-5.41553	-4.14111	-23.0998	-20.4231	-5.06543	-2.43293	-21.4891	-18.9789	1.81977	2.10835
-9.11971	-7.48452	-33.9691	-27.1389	-3.07855	0.750915	-18.3424	-20.6957	-6.78577	-4.08651	-25.5066	-5.11676	-2.74335	-1.22143	-17.4958	-24.1667	-6.47866	-3.58596	-21.5815	-19.1301	-5.93159	-3.79632	-26.8524	-18.6757	-4.94122	-2.17441	-23.4257	-29.2975	-6.03989	-4.08267	-25.4965	-20.1093	-7.33025	-2.69171	-25.3079	-22.459	-7.26692	-3.28239	-14.423	-19.7507	-6.50754	-4.79845	-24.7032	-22.1294	-6.02031	-3.31395	-23.3731	-20.7882	1.85674	2.08998
-9.84764	-8.2443	-35.793	-28.8817	-3.91005	-0.0540645	-20.1087	-22.3536	-7.80308	-5.01106	-27.8098	-6.41284	-3.51164	-1.94694	-18.8782	-25.3477	-7.49617	-4.53413	-23.4813	-20.9984	-6.85102	-4.60777	-28.664	-20.9432	-5.65439	-3.01271	-25.401	-30.763	-6.66467	-4.79613	-26.9867	-21.6004	-8.0496	-3.38977	-27.1709	-24.3408	-8.31547	-4.23623	-16.5795	-22.4464	-7.46232	-5.40139	-26.1978	-23.805	-6.86964	-4.11223	-25.1883	-22.5357	1.8847	2.08179
-10.5494	-8.94639	-37.4638	-30.5463	-4.66785	-0.774744	-21.7659	-23.842	-8.71358	-5.8516	-30.0591	-7.75985	-4.20175	-2.61125	-20.2422	-26.4946	-8.43372	-5.40291	-25.267	-22.4866	-7.65801	-5.31279	-30.3365	-23.1524	-6.3333	-3.79329	-27.3431	-31.9812	-7.22393	-5.42118	-28.4149	-23.0129	-8.71144	-4.03074	-28.9264	-26.0922	-9.26853	-5.13418	-18.7409	-25.1273	-8.28104	-5.95985	-27.5776	-25.4354	-7.64023	-4.8399	-26.9216	-24.1755	1.92339	2.08204
-11.1279	-9.59954	-38.946	-32.1127	-5.36738	-1.42504	-23.3176	-25.1654	-9.52757	-6.61656	-32.1806	-9.207	-4.83058	-3.22302	-21.5916	-27.5964	-9.30404	-6.20525	-26.9412	-23.9982	-8.37497	-5.92521	-31.8764	-25.3176	-6.98566	-4.52729	-29.2217	-32.9266	-7.73978	-5.97039	-29.7763	-24.3332	-9.31871	-4.6232	-30.561	-27.6844	-10.1435	-5.97812	-20.8863	-27.749	-8.97472	-6.47984	-28.8403	-27.0035	-8.33589	-5.50668	-28.5581	-25.7358	1.95124	2.08915
-11.7645	-10.2124	-40.2004	-33.5503	-6.01825	-2.0161	-24.7647	-26.3248	-10.2646	-7.31496	-34.1363	-10.784	-5.41742	-3.79072	-22.931	-28.639	-10.1216	-6.95288	-28.5102	-25.2614	-9.02261	-6.45366	-33.2845	-27.4138	-7.61857	-5.22318	-30.9963	-33.5678	-8.22781	-6.45607	-31.0676	-25.5481	-9.87263	-5.1736	-32.067	-29.0968	-10.9552	-6.76636	-22.991	-30.2641	-9.56932	-6.96589	-29.9827	-28.4919	-8.98658	-6.12052	-30.0847	-27.1765	1.99089	2.10224
-12.1265	-10.7942	-41.1955	-34.8221	-6.62781	-2.55677	-26.1032	-27.3132	-10.9497	-7.95712	-35.9353	-12.494	-5.98221	-4.32393	-24.2629	-29.6057	-10.8985	-7.65746	-29.9797	-26.5982	-9.61499	-6.90295	-34.5558	-29.3853	-8.24136	-5.88639	-32.623	-33.8738	-8.69866	-6.88955	-32.2861	-26.6459	-10.375	-5.68706	-33.4351	-30.3178	-11.7137	-7.49723	-25.0645	-32.6213	-10.1031	-7.42124	-30.9976	-29.8853	-9.57558	-6.68853	-31.4944	-28.5057	1.99466	2.1211
-12.9062	-11.3536	-41.9189	-35.8913	-7.20359	-3.05437	-27.3274	-28.1128	-11.6081	-8.55315	-37.5851	-14.3367	-6.54294	-4.83407	-25.5892	-30.4815	-11.6414	-8.32915	-31.3545	-27.9226	-10.1594	-7.28009	-35.682	-31.1771	-8.86465	-6.52194	-34.0612	-33.8228	-9.16103	-7.2785	-33.4305	-27.6177	-10.8286	-6.16736	-34.6558	-31.3449	-12.4252	-8.16927	-27.1644	-34.7622	-10.6157	-7.8479	-31.8769	-31.1734	-10.1779	-7.21722	-32.786	-29.6948	2.05219	2.14562
-13.4656	-11.8979	-42.3847	-36.7281	-7.75391	-3.51684	-28.433	-28.6983	-12.2565	-9.11216	-39.0746	-16.3177	-7.11405	-5.33372	-26.9094	-31.2548	-12.3509	-8.97264	-32.6395	-28.9976	-10.6626	-7.59847	-36.6505	-32.7407	-9.49627	-7.13659	-35.2809	-33.4321	-9.62093	-7.6263	-34.5013	-28.4588	-11.2387	-6.61847	-35.7183	-32.1773	-13.0929	-8.78108	-29.3488	-36.6329	-11.1352	-8.24882	-32.6123	-32.3495	-10.7443	-7.713	-33.9594	-30.708	2.07687	2.17497
-13.9751	-12.4347	-42.6398	-37.3151	-8.28695	-3.95426	-29.4184	-29.0444	-12.9005	-9.64276	-40.3773	-18.4349	-7.70657	-5.8346	-28.2172	-31.9131	-13.0251	-9.58797	-33.8399	-29.9955	-11.1352	-7.87691	-37.4452	-34.0307	-10.1377	-7.73866	-36.262	-32.784	-10.0813	-7.93801	-35.5013	-29.1689	-11.615	-7.04581	-36.6126	-32.8137	-13.7172	-9.33457	-31.604	-38.1931	-11.6713	-8.62829	-33.1959	-33.4057	-11.2956	-8.18332	-35.0103	-31.5545	2.08873	2.20789
-14.54	-12.9727	-42.7662	-37.653	-8.81215	-4.37844	-30.281	-29.1381	-13.5372	-10.1532	-41.4492	-20.6632	-8.32742	-6.34598	-29.5005	-32.4389	-13.6671	-10.1754	-34.9601	-30.8874	-11.5917	-8.13904	-38.0459	-35.0057	-10.7848	-8.33613	-36.9893	-32.0213	-10.5452	-8.22464	-36.4329	-29.7484	-11.9746	-7.45633	-37.335	-33.2561	-14.2973	-9.83782	-33.844	-39.4087	-12.2162	-8.99157	-33.6191	-34.3339	-11.8449	-8.63739	-35.9294	-32.2322	2.09914	2.24317
-15.0464	-13.5211	-42.8753	-37.7641	-9.34189	-4.80277	-31.0152	-28.9879	-14.1597	-10.6515	-42.2487	-22.9583	-8.97739	-6.8745	-30.7433	-32.8112	-14.2874	-10.7382	-36.0002	-31.7615	-12.047	-8.41152	-38.4313	-35.6342	-11.4323	-8.93771	-37.4498	-31.329	-11.0196	-8.50043	-37.2958	-30.1997	-12.339	-7.85877	-37.8921	-33.5167	-14.8334	-10.3038	-35.9798	-40.2441	-12.7497	-9.34621	-33.8675	-35.1263	-12.3849	-9.08604	-36.709	-32.7575	2.09142	2.27956
-15.4878	-14.0875	-43.0944	-37.6928	-9.88984	-5.24135	-31.6146	-28.6332	-14.761	-11.1446	-42.7523	-25.2774	-9.65092	-7.42517	-31.9271	-33.0143	-14.9032	-11.2839	-36.9558	-32.279	-12.5146	-8.71847	-38.5861	-35.8716	-12.0772	-9.55227	-37.6445	-30.9116	-11.5119	-8.77836	-38.0873	-30.5266	-12.728	-8.26259	-38.3015	-33.6223	-15.3293	-10.746	-37.954	-40.6633	-13.2479	-9.70361	-33.9255	-35.7755	-12.9183	-9.54034	-37.3494	-33.1152	2.06377	2.31548
-15.9821	-14.6764	-43.5496	-37.503	-10.4678	-5.70686	-32.0751	-28.1522	-15.3385	-11.6386	-42.9706	-27.5879	-10.3387	-8.00182	-33.0349	-33.0413	-15.5337	-11.823	-37.8207	-32.8005	-13.0057	-9.07694	-38.5046	-35.6563	-12.7187	-10.186	-37.5916	-30.9612	-12.0204	-9.06793	-38.8039	-30.7339	-13.1546	-8.67612	-38.5885	-33.6137	-15.7929	-11.1767	-39.715	-40.6444	-13.6946	-10.079	-33.7936	-36.2739	-13.4589	-10.0099	-37.8589	-33.3608	2.03237	2.34943
-16.4261	-15.2882	-44.345	-37.2728	-11.0826	-6.20911	-32.396	-27.6633	-15.8955	-12.1399	-42.9651	-29.8575	-11.0321	-8.60674	-34.0548	-32.8967	-16.1947	-12.3659	-38.5911	-33.0722	-13.5297	-9.49666	-38.1941	-34.9562	-13.3574	-10.8424	-37.3362	-31.5767	-12.5354	-9.37464	-39.4416	-30.8308	-13.6258	-9.10607	-38.7831	-33.5421	-16.2379	-11.6073	-41.2023	-40.2061	-14.0907	-10.4867	-33.4999	-36.6122	-14.0007	-10.5021	-38.2554	-33.4988	1.98872	2.3802
-17.0115	-15.9203	-45.5388	-37.0895	-11.7357	-6.75364	-32.58	-27.3178	-16.4393	-12.6557	-42.9031	-32.0446	-11.7268	-9.24129	-34.9781	-32.5967	-16.8947	-12.9218	-39.2661	-33.0381	-14.0936	-9.98384	-37.6803	-33.8052	-13.994	-11.5247	-36.9713	-32.6384	-13.0497	-9.70155	-39.9965	-30.8319	-14.1456	-9.55823	-38.9257	-33.4666	-16.6821	-12.0488	-42.3579	-39.4274	-14.4533	-10.9368	-33.1082	-36.7813	-14.566	-11.0224	-38.5733	-33.5489	1.96215	2.40706
-17.6317	-16.5687	-47.1049	-37.0453	-12.4244	-7.3412	-32.6348	-27.2783	-16.9821	-13.1938	-43.0962	-34.1012	-12.4222	-9.90648	-35.795	-32.1662	-17.6354	-13.498	-39.8478	-33.0266	-14.7018	-10.5427	-37.0112	-32.3027	-14.6288	-12.2365	-36.6386	-33.7658	-13.5627	-10.0515	-40.4673	-30.7561	-14.717	-10.0388	-39.0671	-33.4519	-17.1427	-12.5106	-43.1311	-38.4624	-14.8074	-11.4375	-32.7166	-36.7728	-15.1506	-11.5751	-38.8646	-33.5572	1.945	2.42988
-18.2546	-17.2298	-48.8932	-37.2347	-13.1449	-7.96827	-32.5775	-27.6877	-17.5389	-13.7598	-43.8033	-35.9856	-13.1182	-10.6007	-36.4937	-31.6355	-18.4126	-14.1016	-40.3439	-32.5608	-15.3567	-11.1747	-36.2592	-30.6101	-15.2629	-12.9808	-36.5129	-34.4314	-14.0802	-10.4299	-40.8573	-30.6252	-15.3415	-10.5549	-39.2644	-33.5666	-17.6307	-12.9995	-43.4667	-37.5453	-15.1775	-11.9953	-32.4362	-36.5836	-15.7562	-12.1632	-39.1735	-33.497	1.93614	2.44909
-18.984	-17.9022	-50.6265	-37.7459	-13.8932	-8.6292	-32.4405	-28.6315	-18.122	-14.3555	-44.8471	-37.6664	-13.8149	-11.3195	-37.0591	-31.0391	-19.2183	-14.7383	-40.7735	-32.114	-16.0601	-11.8783	-35.522	-28.9895	-15.898	-13.7593	-36.7621	-34.1673	-14.613	-10.8468	-41.175	-30.4644	-16.0193	-11.114	-39.5798	-33.8753	-18.1493	-13.5208	-43.3137	-36.9722	-15.5786	-12.6117	-32.364	-36.2236	-16.3955	-12.7887	-39.4967	-33.4445	1.94916	2.46531
-19.7438	-18.5869	-51.9473	-38.6355	-14.6624	-9.31878	-32.2777	-30.0939	-18.7375	-14.981	-45.5197	-39.1119	-14.5123	-12.0572	-37.4713	-30.4163	-20.0428	-15.4125	-41.1733	-31.4376	-16.8164	-12.6503	-34.9228	-27.7936	-16.5372	-14.5708	-37.4797	-32.703	-15.1766	-11.3152	-41.4334	-30.3011	-16.7483	-11.7233	-40.0736	-34.4008	-18.6948	-14.0786	-42.653	-37.0359	-16.0147	-13.2836	-32.5639	-35.7226	-17.0624	-13.4526	-39.7741	-33.4229	1.97218	2.47888
-20.3949	-19.2869	-52.4964	-39.8914	-15.4443	-10.0328	-32.1681	-31.9199	-19.3853	-15.6376	-44.9219	-40.2798	-15.2101	-12.8093	-37.7094	-29.8175	-20.8772	-16.1261	-41.6004	-30.7694	-17.6317	-13.4878	-34.6025	-27.2917	-17.1844	-15.4131	-38.6194	-29.9812	-15.7885	-11.8457	-41.6486	-30.1638	-17.5256	-12.3902	-40.7678	-35.0709	-19.2623	-14.6762	-41.5487	-37.8403	-16.4845	-14.0074	-33.0645	-35.1328	-17.7444	-14.1557	-39.9225	-33.469	1.98335	2.48982
-21.0736	-20.0071	-51.9905	-41.4048	-16.2317	-10.7689	-32.2093	-33.8062	-20.0634	-16.3269	-42.4542	-41.1117	-15.9077	-13.5741	-37.7541	-29.3135	-21.715	-16.8773	-42.1258	-30.2795	-18.5104	-14.3863	-34.6866	-27.4408	-17.8445	-16.2846	-39.9643	-26.1328	-16.4649	-12.4472	-41.8385	-30.0839	-18.3483	-13.1219	-41.591	-35.6934	-19.8486	-15.3182	-40.2155	-39.0869	-16.9865	-14.7816	-33.8613	-34.527	-18.454	-14.8995	-39.881	-33.5346	1.99874	2.498
-21.8282	-20.7555	-50.2647	-42.968	-17.0193	-11.5261	-32.4984	-35.3487	-20.7726	-17.0509	-38.0767	-41.5376	-16.6066	-14.3521	-37.5879	-28.9945	-22.551	-17.6647	-42.8151	-30.0941	-19.4543	-15.3392	-35.229	-27.8721	-18.5248	-17.1863	-41.1631	-21.4339	-17.2216	-13.1278	-42.0233	-30.0962	-19.2132	-13.9234	-42.3535	-35.9851	-20.4539	-16.0112	-39.0349	-40.1122	-17.5205	-15.6045	-34.9076	-33.9921	-19.1969	-15.6856	-39.6322	-33.494	2.02282	2.50393
-22.5553	-21.542	-47.2755	-44.2957	-17.8018	-12.3066	-33.1076	-36.1358	-21.5196	-17.8138	-32.2239	-41.492	-17.3111	-15.1451	-37.1954	-28.9478	-23.3837	-18.4904	-43.6967	-30.5188	-20.4621	-16.3395	-36.1644	-28.1107	-19.2338	-18.1212	-41.8341	-16.2186	-18.072	-13.8947	-42.2263	-30.2405	-20.1181	-14.7961	-42.786	-35.6521	-21.0839	-16.7633	-38.4619	-40.1972	-18.0906	-16.4732	-36.0972	-33.6227	-19.9666	-16.5169	-39.1881	-33.2211	2.04182	2.50883
-23.2345	-22.3767	-43.0891	-45.0708	-18.5738	-13.1167	-34.0611	-35.8488	-22.3134	-18.622	-25.5276	-40.9434	-18.0286	-15.9562	-36.5683	-29.2198	-24.2193	-19.3612	-44.7308	-30.9306	-21.5299	-17.3821	-37.3057	-27.7649	-19.9802	-19.0939	-41.678	-10.7982	-19.0196	-14.7532	-42.4745	-30.5532	-21.0638	-15.7381	-42.6223	-34.4892	-21.7515	-17.581	-38.8619	-38.9113	-18.706	-17.3821	-37.2552	-33.5136	-20.7655	-17.3967	-38.5613	-32.5494	2.05589	2.51411
-24.3055	-23.2674	-37.8621	-45.0142	-19.3324	-13.9654	-35.3138	-34.3204	-23.163	-19.4821	-18.5339	-39.9196	-18.7691	-16.7904	-35.7199	-29.7825	-25.0702	-20.2844	-45.796	-31.7503	-22.653	-18.4646	-38.3894	-26.5811	-20.7734	-20.1109	-40.5263	-5.44169	-20.06	-15.7067	-42.7967	-31.0432	-22.0529	-16.7437	-41.6848	-32.4364	-22.4729	-18.4703	-40.2728	-36.2192	-19.3754	-18.3254	-38.1468	-33.7423	-21.6389	-18.3283	-37.7311	-31.4774	2.12188	2.52096
-24.9204	-24.2198	-31.819	-43.9427	-20.0815	-14.8627	-36.7338	-31.5404	-24.0755	-20.3992	-11.602	-38.5105	-19.5445	-17.6537	-34.7075	-30.5275	-25.9498	-21.2678	-46.706	-32.9664	-23.8275	-19.5879	-39.1425	-24.4541	-21.6228	-21.1795	-38.3352	-0.403231	-21.1923	-16.7573	-43.2181	-31.6653	-23.0874	-17.8064	-39.9285	-29.5657	-23.2633	-19.4377	-42.1275	-32.3563	-20.1028	-19.301	-38.5164	-34.3414	-22.5153	-19.3157	-36.6215	-30.0249	2.13865	2.53008
-25.8964	-25.2386	-25.233	-41.7885	-20.8324	-15.8177	-38.1027	-27.6268	-25.0576	-21.3788	-4.98579	-36.865	-20.3684	-18.5529	-33.6595	-31.2866	-26.8713	-22.3207	-47.2468	-34.412	-25.0535	-20.7576	-39.3465	-21.4523	-22.537	-22.3086	-35.1594	4.05548	-22.4224	-17.9075	-43.7467	-32.3131	-24.1689	-18.9217	-37.4222	-26.0369	-24.1341	-20.4893	-43.3187	-27.66	-20.8906	-20.313	-38.1406	-35.2717	-23.4757	-20.3642	-35.1238	-28.2416	2.2048	2.54242
-26.962	-26.3286	-18.4144	-38.5941	-21.6029	-16.8386	-39.1457	-22.794	-26.1164	-22.4276	1.02699	-35.2179	-21.2554	-19.4963	-32.779	-31.8724	-27.8484	-23.4521	-47.2137	-35.3666	-26.3367	-21.9802	-38.8735	-17.7809	-23.5237	-23.508	-31.1225	7.66444	-23.7612	-19.1603	-44.3539	-32.8335	-25.3008	-20.089	-34.3017	-22.047	-25.0906	-21.6281	-42.716	-22.4462	-21.7437	-21.3702	-36.8657	-36.4137	-24.5038	-21.4799	-33.1599	-26.1547	2.28618	2.55905
-28.0506	-27.496	-11.6994	-34.4941	-22.4176	-17.9336	-39.5873	-17.3265	-27.2593	-23.5537	6.05868	-33.9236	-22.2189	-20.4938	-32.2966	-32.1239	-28.8955	-24.6708	-46.4421	-35.7467	-27.6853	-23.2602	-37.6827	-13.6716	-24.5865	-24.7872	-26.4002	10.1835	-25.2199	-20.5186	-44.9552	-33.0579	-26.4903	-21.3116	-30.7242	-17.789	-26.1337	-22.8548	-39.7332	-16.9549	-22.6702	-22.4809	-34.6231	-37.5832	-25.6025	-22.6692	-30.735	-23.8625	2.37404	2.58106
-28.9943	-28.7482	-5.42707	-29.686	-23.3033	-19.1089	-39.2106	-11.5475	-28.493	-24.7658	9.71268	-33.3562	-23.2697	-21.5564	-32.3811	-31.9324	-30.0267	-25.985	-44.8336	-35.9637	-29.1065	-24.5998	-35.7953	-9.30893	-25.7252	-26.1544	-21.2078	11.455	-26.807	-21.9834	-45.4083	-32.8426	-27.7486	-22.5976	-26.8379	-13.4389	-27.2627	-24.1685	-34.5046	-11.3941	-23.6807	-23.6539	-31.436	-38.5629	-26.7653	-23.9383	-27.939	-21.5071	2.45131	2.60972
-30.3378	-30.093	0.101057	-24.3967	-24.2838	-20.3685	-37.9024	-5.78715	-29.8227	-26.0724	11.722	-33.6243	-24.4166	-22.6954	-33.0571	-31.2419	-31.2549	-27.4011	-42.3639	-35.6603	-30.6064	-26	-33.2746	-4.84707	-26.9398	-27.6166	-15.7947	11.4448	-28.5312	-23.5532	-45.5345	-32.1	-29.089	-23.9588	-22.7733	-9.16364	-28.4767	-25.5696	-27.7421	-6.00343	-24.7873	-24.8997	-27.4204	-39.1406	-28.0496	-25.2935	-24.9127	-19.1382	2.56788	2.64627
-31.5995	-31.5372	4.65842	-18.8557	-25.3791	-21.7158	-35.6597	-0.354915	-31.2519	-27.4795	12.0932	-34.4458	-25.666	-23.9221	-34.1778	-30.0404	-32.5916	-28.9251	-39.0763	-35.1709	-32.1928	-27.4622	-30.208	-0.498558	-28.2315	-29.1798	-10.4374	10.2261	-30.3993	-25.224	-45.1595	-30.8055	-30.5247	-25.4076	-18.6556	-5.12923	-29.7782	-27.0597	-20.3915	-1.08279	-26.001	-26.2299	-22.7754	-39.1486	-29.4196	-26.7403	-21.799	-16.846	2.67739	2.69126
-32.9905	-33.0844	8.11443	-13.2828	-26.6043	-23.1538	-32.5596	4.47885	-32.7825	-28.9884	11.1039	-35.291	-27.0221	-25.2446	-35.4597	-28.3538	-34.0476	-30.5609	-35.0704	-34.0409	-33.8728	-28.9888	-26.6918	3.39965	-29.6023	-30.847	-5.42794	7.89109	-32.4016	-26.9923	-44.1538	-28.9838	-32.0693	-26.9543	-14.6178	-1.50026	-31.1722	-28.6407	-13.27	3.00721	-27.3316	-27.6568	-17.7601	-38.4864	-30.8997	-28.2829	-18.7084	-14.6511	2.79757	2.74416
-34.483	-34.7338	10.4409	-7.88577	-27.9679	-24.6839	-28.7299	8.49983	-34.4129	-30.594	9.07969	-35.6009	-28.4859	-26.6653	-36.5576	-26.2385	-35.633	-32.3063	-30.4887	-32.445	-35.6497	-30.5861	-22.8251	6.41555	-31.0547	-32.6178	-1.05701	4.50552	-34.508	-28.857	-42.4591	-26.6912	-33.7353	-28.605	-10.805	1.57377	-32.6653	-30.3122	-6.97604	5.90266	-28.7891	-29.1928	-12.6615	-37.1214	-32.4895	-29.9231	-15.7308	-12.6441	2.92275	2.80346
-36.0175	-36.4785	11.6998	-2.85864	-29.4716	-26.3072	-24.3386	11.5635	-36.1378	-32.2863	6.12402	-34.9921	-30.0545	-28.1807	-37.1565	-23.7715	-37.3547	-34.1511	-25.5027	-30.2605	-37.5227	-32.2633	-18.7114	8.13511	-32.5916	-34.4895	2.40895	0.277053	-36.6794	-30.8141	-40.0885	-24.004	-35.5302	-30.363	-7.36886	3.98563	-34.2638	-32.0693	-1.94086	7.33371	-30.3824	-30.8465	-7.76175	-35.079	-34.1824	-31.659	-12.967	-10.8792	3.04421	2.86653
-37.7497	-38.3056	12.0086	1.62441	-31.111	-28.0261	-19.5851	13.605	-37.9478	-34.0503	2.14861	-33.3453	-31.7182	-29.7819	-37.0407	-21.0428	-39.2119	-36.0771	-20.3051	-27.6092	-39.4892	-34.0307	-14.4654	8.2794	-34.2145	-36.4565	4.75652	-4.30978	-38.8746	-32.8522	-37.116	-21.0119	-37.4543	-32.228	-4.45329	5.69595	-35.9716	-33.9032	1.57363	7.18831	-32.1182	-32.6229	-3.31728	-32.4315	-35.9874	-33.485	-10.5269	-9.39614	3.16568	2.92943
-39.5881	-40.1967	11.494	5.4182	-32.8779	-29.844	-14.6879	14.6431	-39.8297	-35.8669	-2.62023	-30.7599	-33.4608	-31.4556	-36.1197	-18.1522	-41.1936	-38.061	-15.1081	-24.645	-41.5441	-35.8951	-10.2182	6.74424	-35.9237	-38.5094	5.84885	-8.63781	-41.0502	-34.9503	-33.6585	-17.8146	-39.4994	-34.193	-2.17545	6.74294	-37.7874	-35.8044	3.51442	5.52604	-34.0018	-34.5236	0.445977	-29.2816	-37.887	-35.3909	-8.48044	-8.2015	3.27449	2.98727
-41.5233	-42.1304	10.2438	8.41797	-34.7608	-31.7618	-9.87817	14.77	-41.7665	-37.7164	-7.48102	-27.4371	-35.2618	-33.1863	-34.4171	-15.2026	-43.2825	-40.0769	-10.1379	-21.1883	-43.6728	-37.8552	-6.12641	3.61807	-37.718	-40.6355	5.63843	-12.3029	-43.1632	-37.0794	-29.8528	-14.5176	-41.648	-36.2423	-0.610065	7.22322	-39.7046	-37.7635	4.02874	2.5573	-36.035	-36.5449	3.34521	-25.7421	-39.867	-37.363	-6.84066	-7.25491	3.36375	3.03568
-43.4029	-44.0837	8.27381	10.5695	-36.745	-33.7751	-5.39046	14.1202	-43.7386	-39.5818	-11.7039	-23.569	-37.0991	-34.9578	-32.0331	-12.2932	-45.4563	-42.1011	-5.61807	-17.5604	-45.8451	-39.8988	-2.37384	-0.626869	-39.5905	-42.8143	4.16627	-15.2591	-45.1776	-39.2088	-25.8362	-11.2285	-43.875	-38.3511	0.21297	7.24502	-41.7104	-39.7705	3.42583	-1.38259	-38.211	-38.6744	5.25579	-21.9202	-41.8956	-39.3834	-5.60191	-6.53683	3.42191	3.07153
-45.5039	-46.0307	5.54985	11.8666	-38.8097	-35.8743	-1.44534	12.8289	-45.7245	-41.4475	-14.9603	-19.3017	-38.9527	-36.7526	-29.1105	-9.51734	-47.6856	-44.1162	-1.74547	-13.6321	-48.0192	-42.0032	0.847161	-5.09136	-41.5251	-45.0165	1.55929	-17.586	-47.0687	-41.3122	-21.7376	-8.05457	-46.1477	-40.4887	0.288169	6.86778	-43.7856	-41.8123	2.1123	-5.84202	-40.507	-40.8882	6.11763	-17.9105	-43.9754	-41.4311	-4.77498	-5.94295	3.46097	3.09286
-47.7196	-47.9408	2.09391	12.3343	-40.9286	-38.0437	1.7783	10.9891	-47.6997	-43.2958	-17.3812	-14.7634	-40.8054	-38.551	-25.8153	-6.96031	-49.9319	-46.1093	1.32436	-9.78192	-50.1532	-44.1368	3.36957	-8.99048	-43.4988	-47.2035	-1.94597	-19.3687	-48.8227	-43.3697	-17.6744	-5.10047	-48.4249	-42.6229	-0.391004	6.06106	-45.9035	-43.8711	0.44716	-10.286	-42.8815	-43.1519	5.9247	-13.8022	-46.07	-43.4815	-4.38817	-5.42445	3.4791	3.09836
-50.0083	-49.7804	-1.90754	12.0044	-43.071	-40.2609	4.17017	8.62555	-49.632	-45.1028	-19.2544	-10.1135	-42.6432	-40.3322	-22.3222	-4.69841	-52.151	-48.0651	3.48307	-5.74007	-52.2078	-46.258	5.0778	-12.0595	-45.4853	-49.3293	-5.97008	-20.7162	-50.4293	-45.3659	-13.7551	-2.46868	-50.6583	-44.7223	-1.83864	4.7158	-48.0282	-45.9215	-1.46248	-14.2505	-45.2781	-45.4244	4.69587	-9.69268	-48.1448	-45.5057	-4.46214	-4.94488	3.47987	3.08638
-51.8393	-51.5118	-6.12544	10.8949	-45.2029	-42.4968	5.70143	5.70285	-51.4794	-46.8363	-20.747	-5.57401	-44.4525	-42.0766	-18.8008	-2.79887	-54.2968	-49.9594	4.67219	-1.72417	-54.1422	-48.3135	5.90935	-14.4352	-47.4576	-51.3431	-10.0307	-21.7535	-51.8745	-47.2834	-10.0875	-0.251545	-52.7961	-46.7535	-4.04257	2.70905	-50.1156	-47.9284	-3.88405	-17.4907	-47.6348	-47.6642	2.45856	-5.69892	-50.1174	-47.4697	-4.99786	-4.58365	3.43846	3.05391
-53.7477	-53.0936	-10.2263	9.00156	-47.2877	-44.7136	6.41872	2.20261	-53.1908	-48.455	-21.8832	-1.41953	-46.2166	-43.7674	-15.4058	-1.31645	-56.3232	-51.7575	4.87861	1.86712	-55.9105	-50.2393	5.83573	-16.3533	-49.3873	-53.1916	-13.7239	-22.585	-53.1388	-49.0954	-6.78154	1.4834	-54.7847	-48.6771	-6.90016	-0.00379916	-52.1169	-49.8458	-7.19634	-19.9944	-49.8956	-49.8336	-0.703456	-1.96138	-52	-49.3336	-5.9716	-4.46174	3.38273	2.99694
-55.5247	-54.4847	-13.9878	6.31857	-49.2857	-46.8633	6.42348	-1.7639	-54.711	-49.9134	-22.6858	2.06223	-47.9107	-45.3863	-12.27	-0.295655	-58.1838	-53.4179	4.12688	5.05034	-57.4655	-51.9681	4.83911	-17.986	-51.2426	-54.8224	-16.8817	-23.2699	-54.2	-50.7633	-3.94479	2.70061	-56.5695	-50.4466	-10.1979	-3.32472	-53.9817	-51.6211	-11.2569	-21.8878	-52.0201	-51.8964	-4.57414	1.36362	-53.7359	-51.053	-7.30996	-4.63932	3.30224	2.91315
-56.9442	-55.6492	-17.3198	2.89761	-51.1557	-48.8902	5.84022	-5.93103	-55.99	-51.1681	-23.228	4.62772	-49.499	-46.9088	-9.50021	0.216259	-59.8312	-54.896	2.48343	7.63282	-58.7676	-53.4434	2.91054	-19.4635	-52.9864	-56.1885	-19.5163	-23.8267	-55.0351	-52.2443	-1.67543	3.39348	-58.1001	-52.0127	-13.6703	-7.01633	-55.6579	-53.2017	-15.2079	-23.3152	-53.9799	-53.8157	-8.83108	4.12305	-55.2679	-52.5835	-8.88316	-5.15108	3.18881	2.80478
-58.0012	-56.5565	-20.2164	-1.09135	-52.8555	-50.7346	4.77896	-9.99778	-56.9906	-52.1856	-23.59	6.14164	-50.9343	-48.301	-7.17531	0.159599	-61.2203	-56.1457	0.0773444	9.27933	-59.7912	-54.6323	0.0850135	-20.9037	-54.573	-57.2508	-21.6697	-24.2544	-55.6201	-53.5019	-0.0564408	3.57378	-59.3394	-53.3315	-17.0618	-10.7854	-57.0945	-54.5416	-18.2479	-24.3792	-55.7508	-55.5542	-13.1234	6.19133	-56.561	-53.8851	-10.5636	-6.00601	3.05434	2.67953
-58.6951	-57.1764	-22.7052	-5.36657	-54.3425	-52.3407	3.30255	-13.7597	-57.6882	-52.9454	-23.8328	6.60046	-52.1632	-49.5226	-5.33984	-0.532913	-62.3094	-57.1206	-2.88944	10.0647	-60.5231	-55.5246	-3.48959	-22.3825	-55.9523	-57.9795	-23.3659	-24.5463	-55.9293	-54.5073	0.847511	3.25177	-60.2693	-54.3719	-20.1707	-14.3949	-58.2461	-55.6052	-20.3677	-25.1426	-57.3085	-57.0751	-17.1292	7.48147	-57.5843	-54.9245	-12.2855	-7.15701	2.91943	2.54809
-59.3038	-57.4794	-24.8244	-9.62628	-55.5782	-53.6638	1.41055	-17.1358	-58.0646	-53.4379	-23.9885	6.06817	-53.1388	-50.5358	-4.00507	-1.90398	-63.0558	-57.7789	-6.16359	10.0524	-60.9558	-56.1239	-7.50182	-23.9229	-57.0778	-58.3548	-24.6536	-24.6995	-55.9371	-55.235	0.987299	2.41211	-60.8842	-55.113	-22.8761	-17.7077	-59.077	-56.3652	-22.0781	-25.6436	-58.6286	-58.3412	-20.6414	7.93593	-58.3365	-55.6753	-14.0304	-8.561	2.81482	2.42117
-59.7584	-57.443	-26.6171	-13.6485	-56.5344	-54.6743	-0.948059	-20.1227	-58.1053	-53.6565	-24.0683	4.55493	-53.8312	-51.312	-3.17793	-3.90438	-63.42	-58.0913	-9.49054	9.88963	-61.0827	-56.4387	-11.5497	-25.5114	-57.9093	-58.368	-25.6139	-24.7227	-55.6231	-55.6608	0.326045	1.00438	-61.1815	-55.5357	-25.1269	-20.6664	-59.5624	-56.7998	-23.7591	-25.9122	-59.6896	-59.3148	-23.626	7.50848	-58.7907	-56.1177	-15.7865	-10.1392	2.75151	2.30841
-59.8521	-57.0571	-28.1225	-17.3236	-57.1949	-55.3552	-3.8137	-22.7489	-57.8044	-53.5933	-24.0967	1.95464	-54.2263	-51.8356	-2.89829	-6.36534	-63.3778	-58.0434	-12.6705	9.54979	-60.8957	-56.4747	-15.2924	-27.1281	-58.4176	-58.0213	-26.3322	-24.6424	-54.9781	-55.7625	-1.1495	-1.0272	-61.1617	-55.619	-26.9163	-23.254	-59.691	-56.8953	-25.3886	-25.9847	-60.4727	-59.9607	-26.1851	6.15355	-58.9157	-56.238	-17.5333	-11.8924	2.73344	2.21859
-59.5333	-56.3256	-29.3723	-20.6249	-57.5502	-55.695	-7.12972	-25.0568	-57.1711	-53.2402	-24.1265	-1.78075	-54.3186	-52.1007	-3.25616	-9.09146	-62.9258	-57.6339	-15.585	9.1136	-60.3858	-56.2279	-18.5348	-28.7483	-58.5897	-57.3274	-26.8819	-24.5013	-54.008	-55.5236	-3.39324	-3.6742	-60.8296	-55.3448	-28.281	-25.4698	-59.4644	-56.6465	-26.6698	-25.9062	-60.9617	-60.2511	-28.4452	3.84487	-58.7035	-56.0288	-19.2432	-13.8087	2.76607	2.15964
-58.6414	-55.2633	-30.3987	-23.5651	-57.593	-55.6847	-10.7103	-27.0937	-56.2288	-52.591	-24.2117	-6.29428	-54.1064	-52.1068	-4.3657	-11.9425	-62.075	-56.8725	-18.1838	8.01451	-59.5444	-55.6861	-21.2414	-30.3246	-58.4283	-56.3053	-27.3182	-24.3498	-52.7338	-54.9373	-6.26507	-6.81156	-60.1928	-54.7039	-29.3003	-27.331	-58.8928	-56.0561	-27.3544	-25.7213	-61.1451	-60.1694	-30.4885	0.650596	-58.1438	-55.4888	-20.8944	-15.8881	2.84695	2.13765
-57.7892	-53.8919	-31.24	-26.1716	-57.3178	-55.3177	-14.2986	-28.9067	-55.0072	-51.6454	-24.3792	-10.9228	-53.5935	-51.8552	-6.27949	-14.8184	-60.843	-55.7763	-20.4569	5.17067	-58.3654	-54.8349	-23.4894	-31.7946	-57.9474	-54.9764	-27.6774	-24.2328	-51.1892	-54.0085	-9.54214	-10.2223	-59.26	-53.6982	-30.0755	-28.8688	-57.9909	-55.133	-27.4455	-25.4678	-61.018	-59.7122	-32.3506	-3.18261	-57.302	-54.6227	-22.4759	-18.1289	2.98038	2.15492
-56.441	-52.2353	-31.9355	-28.4781	-56.72	-54.5913	-17.6594	-30.5353	-53.533	-50.4117	-24.6228	-15.1599	-52.7926	-51.3506	-8.90485	-17.6303	-59.2493	-54.3678	-22.4138	1.5809	-56.8454	-53.6624	-25.3856	-33.1034	-57.1652	-53.3617	-27.9832	-24.1793	-49.411	-52.7516	-12.9767	-13.6749	-58.0401	-52.3401	-30.7068	-30.1192	-56.775	-53.8925	-27.1729	-25.1794	-60.58	-58.8874	-34.0441	-7.28425	-56.1411	-53.4411	-23.9823	-20.3421	3.14089	2.20889
-54.8982	-50.3173	-32.5191	-30.5206	-55.7972	-53.5081	-20.6524	-32.0042	-51.8255	-48.9073	-24.9217	-18.7766	-51.724	-50.5989	-12.0213	-20.2967	-57.3125	-52.6751	-24.0804	-3.68286	-54.9848	-52.1613	-27.0205	-34.2091	-56.0991	-51.4802	-28.2581	-24.2083	-47.4316	-51.1871	-16.3594	-16.9923	-56.5425	-50.6502	-31.2773	-31.1211	-55.2641	-52.3558	-26.8146	-24.8884	-59.8337	-57.7106	-35.586	-11.3177	-54.7012	-51.9592	-25.4101	-22.5471	3.31849	2.2932
-53.0935	-48.162	-33.0236	-32.3312	-54.5534	-52.0752	-23.2534	-33.3238	-49.8978	-47.1547	-25.2635	-21.7722	-50.4077	-49.6025	-15.3529	-22.7528	-55.0523	-50.7283	-25.499	-8.32238	-52.7921	-50.3338	-28.463	-35.0828	-54.7642	-49.3502	-28.5285	-24.335	-45.2751	-49.3395	-19.5519	-20.075	-54.7776	-48.6554	-31.8464	-31.9204	-53.484	-50.547	-26.5422	-24.6308	-58.7825	-56.2006	-37.0099	-15.061	-52.9891	-50.1954	-26.7577	-24.5098	3.50197	2.39944
-51.1717	-45.7929	-33.488	-33.935	-53.0018	-50.3018	-25.5168	-34.4939	-47.7572	-45.1768	-25.658	-24.2578	-48.8565	-48.3611	-18.6324	-24.9587	-52.4959	-48.5535	-26.719	-11.5849	-50.2858	-48.1956	-29.7594	-35.7085	-53.1752	-46.9897	-28.8217	-24.5671	-42.9541	-47.2331	-22.4856	-22.8806	-52.7575	-46.3857	-32.447	-32.5658	-51.4686	-48.4904	-26.4019	-24.4466	-57.429	-54.3771	-38.3569	-18.4037	-51.0321	-48.1689	-28.0261	-26.1639	3.68771	2.51843
-49.0976	-43.2328	-33.9548	-35.3517	-51.161	-48.1968	-27.5211	-35.5068	-45.4072	-42.9909	-26.1264	-26.3555	-47.076	-46.8743	-21.67	-26.8994	-49.6819	-46.1682	-27.785	-14.1879	-47.4932	-45.7726	-30.9364	-36.0838	-51.3481	-44.4149	-29.1636	-24.9079	-40.4734	-44.8879	-25.1441	-25.3942	-50.4967	-43.8705	-33.0867	-33.1052	-49.2535	-46.2095	-26.3982	-24.3755	-55.7764	-52.2602	-39.6534	-21.3193	-48.8423	-45.8981	-29.2218	-27.5898	3.87545	2.64171
-46.8375	-40.4999	-34.4614	-36.597	-49.0494	-45.7703	-29.3245	-36.354	-42.8531	-40.6075	-26.6813	-28.1722	-45.0664	-45.1425	-24.3756	-28.5799	-46.6571	-43.5826	-28.7327	-16.6872	-44.4446	-43.0942	-32.021	-36.2224	-49.2991	-41.6406	-29.572	-25.3626	-37.8338	-42.3202	-27.545	-27.6164	-48.0135	-41.1371	-33.754	-33.5862	-46.8672	-43.7263	-26.5517	-24.4351	-53.8312	-49.8704	-40.8986	-23.8237	-46.4321	-43.3992	-30.3562	-28.8579	4.06544	2.76305
-44.2831	-37.6074	-35.0314	-37.683	-46.6818	-43.0345	-30.9534	-37.0286	-40.1042	-38.0323	-27.317	-29.7813	-42.8268	-43.1659	-26.7141	-30.0174	-43.4691	-40.806	-29.5898	-18.9436	-41.167	-40.1915	-33.0574	-36.1628	-47.0446	-38.68	-30.0482	-25.9311	-35.0347	-39.5451	-29.718	-29.5625	-45.3304	-38.21	-34.4299	-34.0536	-44.33	-41.0599	-26.8741	-24.6158	-51.6056	-47.2275	-42.0744	-25.9461	-43.807	-40.6873	-31.4371	-29.9751	4.25552	2.87804
-41.5774	-34.566	-35.6683	-38.6201	-44.0706	-40.0034	-32.413	-37.5271	-37.1737	-35.272	-28.0156	-31.2359	-40.3589	-40.9453	-28.671	-31.2352	-40.1606	-37.8519	-30.3779	-20.9874	-37.6829	-37.0958	-34.0982	-35.9672	-44.5997	-35.5445	-30.5799	-26.606	-32.0806	-36.5772	-31.6871	-31.2581	-42.4729	-35.1125	-35.1021	-34.5382	-41.6571	-38.2266	-27.3534	-24.905	-49.1175	-44.3509	-43.1627	-27.7205	-40.9956	-37.7769	-32.4663	-30.9637	4.44444	2.98316
-38.7254	-31.3854	-36.3567	-39.4198	-41.2266	-36.6947	-33.7015	-37.8496	-34.0778	-32.3363	-28.7582	-32.5868	-37.6688	-38.4817	-30.2558	-32.2596	-36.7666	-34.7373	-31.1117	-22.7613	-34.0121	-33.8341	-35.1722	-35.7109	-41.9774	-32.2418	-31.1492	-27.3786	-28.9831	-33.4312	-33.4636	-32.7294	-39.4656	-31.8665	-35.7702	-35.0486	-38.8613	-35.239	-27.9601	-25.3014	-46.3905	-41.2628	-44.1488	-29.1846	-38.0141	-34.6828	-33.4407	-31.8392	4.62891	3.07641
-35.905	-28.0752	-37.0712	-40.0971	-38.1602	-33.1296	-34.8124	-38.0059	-30.8343	-29.2378	-29.5351	-33.8782	-34.7665	-35.7781	-31.5039	-33.1164	-33.3157	-31.4812	-31.8002	-24.217	-30.173	-30.4263	-36.2629	-35.4685	-39.1886	-28.7754	-31.7423	-28.2427	-25.7572	-30.1209	-35.0521	-33.9975	-36.3279	-28.4925	-36.442	-35.5755	-35.9528	-32.1079	-28.6663	-25.8198	-43.4498	-37.9884	-45.0164	-30.3787	-34.8937	-31.4194	-34.355	-32.6179	4.80906	3.15792
-32.7805	-24.6461	-37.787	-40.6686	-34.883	-29.3327	-35.7365	-38.0225	-27.4578	-25.9892	-30.347	-35.1371	-31.6654	-32.8395	-32.4684	-33.8268	-29.8307	-28.1009	-32.4493	-25.5938	-26.183	-26.8837	-37.3187	-35.3187	-36.2402	-25.1471	-32.3548	-29.1931	-22.4168	-26.6595	-36.4562	-35.0763	-33.0724	-25.0099	-37.1271	-36.0994	-32.9373	-28.8421	-29.4536	-26.482	-40.3163	-34.553	-45.7454	-31.3402	-31.6167	-28.0003	-35.204	-33.3417	4.97591	3.22913
-29.812	-21.1114	-38.4906	-41.1505	-31.4085	-25.3294	-36.465	-37.9412	-23.9587	-22.6021	-31.1966	-36.3693	-28.3813	-29.6723	-33.201	-34.4052	-26.3269	-24.6076	-33.0679	-26.4848	-22.0596	-23.2124	-38.2782	-35.3482	-33.1337	-21.3588	-32.9883	-30.2251	-18.9753	-23.0591	-37.6793	-35.9749	-29.7067	-21.4389	-37.8321	-36.5992	-29.8121	-25.4494	-30.3179	-27.3061	-37.0058	-30.9765	-46.3156	-32.1007	-28.2346	-24.438	-35.9848	-33.9914	5.13773	3.29109
-26.4498	-17.4889	-39.1824	-41.5601	-27.7497	-21.1438	-36.9957	-37.8108	-20.3449	-19.0866	-32.0917	-37.559	-24.9319	-26.2839	-33.7394	-34.8638	-22.811	-21.0041	-33.6701	-27.151	-17.8213	-19.4164	-39.0884	-35.6313	-29.8668	-17.4166	-33.6448	-31.345	-15.4504	-19.3306	-38.7235	-36.7004	-26.2381	-17.8016	-38.5599	-37.0631	-26.5678	-21.9389	-31.2767	-28.3054	-33.528	-27.2702	-46.7104	-32.6814	-24.7054	-20.7438	-36.6984	-34.6065	5.27548	3.34318
-23.1506	-13.8031	-39.8781	-41.917	-23.9154	-16.8	-37.3408	-37.6797	-16.6252	-15.4523	-33.0467	-38.6627	-21.3355	-22.6846	-34.116	-35.2166	-19.2821	-17.2887	-34.2733	-27.9414	-13.4904	-15.5015	-39.7115	-36.2106	-26.4373	-13.3362	-34.3288	-32.5651	-11.8677	-15.4873	-39.592	-37.2592	-22.6787	-14.1229	-39.3104	-37.4909	-23.1933	-18.3219	-32.3557	-29.4825	-29.8854	-23.4404	-46.9169	-33.0887	-21.0783	-16.9308	-37.3518	-35.2286	5.39625	3.38323
-19.7652	-10.0874	-40.6031	-42.2403	-19.9095	-12.3245	-37.5323	-37.5908	-12.8132	-11.7133	-34.083	-39.6202	-17.6113	-18.8891	-34.3637	-35.4814	-15.7324	-13.4598	-34.8974	-28.712	-9.09604	-11.4787	-40.1245	-37.0778	-22.8494	-9.14692	-35.055	-33.8871	-8.2559	-11.5495	-40.2918	-37.6558	-19.0471	-10.4309	-40.0834	-37.8912	-19.6834	-14.6148	-33.5678	-30.8163	-26.0755	-19.5004	-46.9298	-33.3165	-17.349	-13.0178	-37.9574	-35.8445	5.48803	3.409
-16.2099	-6.38426	-41.3837	-42.549	-15.7358	-7.74683	-37.6199	-37.5781	-8.93146	-7.8932	-35.2173	-40.3774	-13.78	-14.9192	-34.5147	-35.6803	-12.1511	-9.52185	-35.5605	-29.4269	-4.67795	-7.36687	-40.3155	-38.1594	-19.1167	-4.8945	-35.8493	-35.307	-4.64373	-7.54602	-40.8336	-37.8918	-15.3693	-6.75707	-40.8795	-38.28	-16.0463	-10.8418	-34.911	-32.2705	-22.0953	-15.4768	-46.7539	-33.3584	-13.5234	-9.03167	-38.5308	-36.4435	5.53871	3.41971
-12.575	-2.74636	-42.2414	-42.866	-11.4089	-3.10628	-37.6616	-37.6663	-5.01282	-4.02986	-36.4559	-40.8912	-9.86764	-10.8068	-34.5986	-35.8382	-8.53224	-5.49032	-36.2755	-29.9958	-0.289396	-3.19565	-40.2803	-39.3614	-15.2606	-0.644495	-36.742	-36.8217	-1.06724	-3.51315	-41.2297	-37.9678	-11.6809	-3.13361	-41.7056	-38.6788	-12.309	-7.0374	-36.3858	-33.8194	-17.9463	-11.4038	-46.3993	-33.2155	-9.6318	-5.0098	-39.0887	-37.0111	5.54284	3.41533
-8.94035	0.763333	-43.1931	-43.22	-6.96023	1.53785	-37.7122	-37.8696	-1.10438	-0.178958	-37.8064	-41.1389	-5.90842	-6.59979	-34.6456	-35.98	-4.88254	-1.39651	-37.0481	-30.5416	3.99909	0.989152	-40.0217	-40.6114	-11.3118	3.51611	-37.7574	-38.427	2.42271	0.503178	-41.4919	-37.8867	-8.02595	0.406609	-42.5795	-39.1098	-8.51799	-3.24577	-37.9926	-35.4537	-13.6388	-7.32127	-45.8828	-32.8999	-5.71533	-1.00237	-39.6483	-37.5581	5.49396	3.39604
-5.27269	4.07423	-44.252	-43.6451	-2.44272	6.10008	-37.817	-38.1952	2.72572	3.58285	-39.2745	-41.1189	-1.94652	-2.36766	-34.6861	-36.1264	-1.22661	2.70786	-37.8749	-30.9735	8.09769	5.12349	-39.5516	-41.8586	-7.31233	7.48261	-38.9132	-40.1216	5.75804	4.44377	-41.6342	-37.6559	-4.45419	3.82645	-43.5286	-39.5949	-4.73603	0.479577	-39.7181	-37.1646	-9.20063	-3.27949	-45.2367	-32.4381	-1.81912	2.92489	-40.2261	-38.0812	5.37782	3.36295
-1.62812	7.11434	-45.4314	-44.1794	2.06492	10.4701	-38.0095	-38.6498	6.38643	7.16126	-40.8581	-40.8356	1.96178	1.79596	-34.7462	-36.2898	2.39476	6.74675	-38.745	-31.14	11.8997	9.12752	-38.8953	-43.0578	-3.31817	11.1389	-40.2207	-41.9125	8.85423	8.23345	-41.674	-37.2885	-1.01818	7.08065	-44.5861	-40.1617	-1.03768	4.07498	-41.5403	-38.9322	-4.68742	0.656339	-44.5107	-31.8728	1.98839	6.69093	-40.8379	-38.5745	5.18546	3.31902
1.81864	9.81624	-46.7418	-44.8586	6.45775	14.5225	-38.3113	-39.2413	9.76787	10.4522	-42.5531	-40.2952	5.74658	5.77539	-34.848	-36.4752	5.92515	10.6227	-39.6456	-31.4916	15.2841	12.9081	-38.0979	-44.1668	0.596994	14.3646	-41.6844	-43.817	11.6153	11.7807	-41.6335	-36.8047	2.22571	10.1165	-45.7876	-40.8498	2.49381	7.46793	-43.4355	-40.735	-0.189645	4.40695	-43.77	-31.2585	5.61293	10.2031	-41.5008	-39.0903	4.92017	3.2689
5.02776	12.1219	-48.1875	-45.71	10.6083	18.1324	-38.7304	-39.9746	12.752	13.3523	-44.3503	-39.5133	9.32664	9.4435	-35.0142	-36.6872	9.29062	14.2231	-40.5676	-31.5945	18.1222	16.359	-37.2295	-45.1736	4.34003	17.0434	-43.3006	-45.8378	13.9407	14.98	-41.542	-36.2348	5.21566	12.8757	-47.1665	-41.7084	5.7706	10.5792	-45.3782	-42.5632	4.16821	7.88388	-43.0929	-30.6539	8.96025	13.3631	-42.2327	-39.6047	4.58316	3.21767
7.98041	13.9865	-49.7615	-46.7494	14.3742	21.1888	-39.2617	-40.85	15.2293	15.7706	-46.2275	-38.532	12.6102	12.6802	-35.2689	-36.9374	12.3979	17.4281	-41.5107	-31.8638	20.2976	19.3626	-36.3813	-46.1238	7.80287	19.0755	-45.0537	-47.9442	15.7351	17.7179	-41.4357	-35.6193	7.88237	15.2957	-48.7457	-42.7846	8.70558	13.3256	-47.3374	-44.4204	8.23497	10.9934	-42.5661	-30.119	11.9319	16.075	-43.05	-40.1767	4.18453	3.16957
10.6048	15.3786	-51.4439	-47.9798	17.6077	23.6015	-39.8931	-41.8605	17.114	17.6385	-48.1778	-37.4365	15.4971	15.3852	-35.6373	-37.2477	15.1372	20.1187	-42.4854	-32.2286	21.7322	21.8018	-35.6538	-47.1298	10.8733	20.3941	-46.9194	-50.0846	16.924	19.8858	-41.3566	-35.0076	10.1494	17.3113	-50.5306	-44.1109	11.2192	15.6254	-49.2692	-46.3201	11.8457	13.6433	-42.2764	-29.7103	14.4277	18.2531	-43.9676	-40.8288	3.75603	3.12789
12.8741	16.2832	-53.206	-49.3903	20.1712	25.3074	-40.6122	-42.9882	18.3564	18.9186	-50.2247	-36.3446	17.8906	17.4809	-36.1449	-37.6442	17.3902	22.19	-43.5105	-32.6178	22.407	23.5802	-35.1388	-48.3486	13.4424	20.9872	-48.8728	-52.1857	17.4733	21.3948	-41.3467	-34.4527	11.9383	18.8622	-52.5073	-45.6967	13.2485	17.4078	-51.1217	-48.2777	14.8409	15.7536	-42.2999	-29.4752	16.3666	19.8333	-44.9987	-41.5838	3.34551	3.09471
14.502	16.7072	-55.0194	-50.9579	21.9571	26.2797	-41.4082	-44.2068	18.9505	19.6082	-52.4001	-35.379	19.7293	18.9159	-36.81	-38.1481	19.0477	23.5693	-44.6046	-32.6316	22.3721	24.6434	-34.8987	-49.9162	15.4114	20.9142	-50.8889	-54.1564	17.4051	22.1926	-41.4396	-34.0031	13.1831	19.9031	-54.6415	-47.5229	14.7639	18.6258	-52.8481	-50.3065	17.0908	17.267	-42.6884	-29.4461	17.6739	20.7842	-46.1498	-42.425	3.03953	3.06844
15.5078	16.6835	-56.8602	-52.6489	22.9147	26.5378	-42.2692	-45.4905	18.938	19.7417	-54.7046	-34.6277	21.0235	19.6776	-37.6332	-38.7684	20.0355	24.2367	-45.7779	-32.9298	21.7463	24.9972	-34.948	-51.8486	16.7069	20.2995	-52.9448	-55.9197	16.8057	22.281	-41.6509	-33.6916	13.8492	20.4156	-56.8844	-49.5425	15.7907	19.2672	-54.4287	-52.4029	18.5193	18.1584	-43.4484	-29.6332	18.3489	21.1178	-47.4137	-43.4094	2.87584	3.04109
15.7628	16.2715	-58.7147	-54.4226	23.0734	26.1559	-43.1821	-46.8196	18.4075	19.3903	-57.105	-34.1092	21.8724	19.8071	-38.5919	-39.4958	20.3378	24.2312	-47.029	-33.1993	20.7017	24.714	-35.2425	-54.0134	17.3036	19.3008	-55.0268	-57.4623	15.8187	21.7278	-41.9698	-33.5203	13.9498	20.4165	-59.1865	-51.6928	16.4263	19.3629	-55.8841	-54.5547	19.1203	18.4416	-44.5225	-30.0127	18.434	20.8927	-48.7686	-44.4821	2.86317	3.00077
15.5785	15.5542	-60.5844	-56.2366	22.5493	25.2608	-44.1324	-48.1797	17.4879	18.6577	-59.5732	-33.7623	22.4626	19.4027	-39.6399	-40.2982	20.0074	23.6459	-48.3473	-33.3082	19.4228	23.9283	-35.6831	-56.2414	17.2441	18.0693	-57.13	-58.8699	14.6162	20.6664	-42.3554	-33.4476	13.5556	19.9624	-61.5117	-53.9154	16.8441	18.9852	-57.2795	-56.7561	18.9634	18.1733	-45.7863	-30.5162	18.0665	20.2096	-50.1839	-45.5938	2.94587	2.93906
[truncated: 2 more columns]

## Sheet: FOOT
SUB1				SUB2				SUB3				SUB4				SUB5				SUB6				SUB7				SUB8				SUB9				SUB10				SUB11				MEAN				SD
gait	gait_sleeve	onehop	onehop_sleeve	gait	gait_sleeve	onehop	onehop_sleeve	gait	gait_sleeve	onehop	onehop_sleeve	gait	gait_sleeve	onehop	onehop_sleeve	gait	gait_sleeve	onehop	onehop_sleeve	gait	gait_sleeve	onehop	onehop_sleeve	gait	gait_sleeve	onehop	onehop_sleeve	gait	gait_sleeve	onehop	onehop_sleeve	gait	gait_sleeve	onehop	onehop_sleeve	gait	gait_sleeve	onehop	onehop_sleeve	gait	gait_sleeve	onehop	onehop_sleeve	gait	gait_sleeve	onehop	onehop_sleeve	gait	gait_sleeve
80.8332	81.5084	80.2262	82.7156	76.1884	73.7595	80.371	81.8522	77.127	75.9427	85.2585	79.9709	71.4375	68.1031	75.8207	73.4906	67.4293	68.6294	67.5559	73.1374	71.5317	72.2656	78.087	67.0438	77.1976	74.3223	80.2024	84.5421	70.6554	71.5405	83.1919	82.5569	71.9294	71.1581	71.5783	67.6641	69.6931	69.0977	68.7427	71.724	78.6318	79.8328	79.4356	72.2637	73.8777	73.2873	77.3155	76.0874	4.27352	4.39919
82.8201	83.4761	82.2404	83.9359	78.1487	75.4938	80.8794	81.8044	78.2832	76.9471	85.8319	83.3239	72.5267	69.5308	76.1958	73.189	68.531	70.1512	69.2321	73.7274	73.3087	74.4297	80.2781	68.2472	78.3428	75.3338	82.7928	86.6506	72.1858	73.1841	82.8933	82.2364	73.0608	72.3382	73.3273	69.7476	70.4046	70.3523	70.8007	73.3842	78.7036	79.8778	79.8112	72.8064	75.1196	74.6468	78.5712	77.1866	4.36125	4.2912
85.0439	85.713	84.1269	85.2953	80.6281	77.6984	81.4419	81.8032	79.5456	77.9145	85.4346	86.4175	73.4023	70.7684	76.42	72.7156	70.2654	72.1337	71.3853	76.2643	75.673	77.0805	82.4512	70.2357	79.94	76.7969	85.3047	88.1425	74.1513	75.0645	82.4385	81.7169	74.6941	73.7897	75.2196	71.9041	71.235	72.0341	73.0086	75.2937	79.0492	79.6245	80.0134	73.2928	76.6934	76.238	79.7495	78.462	4.50425	4.23102
86.3357	87.5366	85.5835	86.8972	83.4752	80.2161	82.0799	81.8291	80.5215	78.6077	84.0494	86.8326	73.9947	71.6308	76.5009	72.0839	72.5034	74.3967	73.8049	78.4942	78.4142	79.9583	84.5441	73.3039	81.7393	78.5195	87.3321	87.193	76.2968	76.988	81.8527	81.0362	76.6255	75.2721	77.3107	74.1652	72.2494	73.9626	75.4682	77.5718	79.3335	78.9115	79.9463	73.6893	78.3172	77.8182	80.7702	79.3724	4.52503	4.2322
86.3656	87.009	85.8653	88.7845	86.4973	82.795	82.7093	81.7009	80.742	78.77	82.22	83.8218	74.2448	72.009	76.4751	71.3134	75.0586	76.7097	76.2661	80.656	81.2526	82.6929	86.3147	77.005	83.3583	80.2545	87.2554	84.9863	78.2808	78.6684	81.1748	80.2513	78.572	76.535	79.5414	76.5252	73.3799	75.9204	78.1513	80.1637	79.1738	77.7764	79.5376	73.9738	79.7205	79.0128	81.4101	79.9256	4.49797	4.06321
84.6012	84.8265	84.7086	89.4293	89.534	84.9396	83.1287	81.1757	80.0091	78.2751	80.347	80.4412	74.1136	71.88	76.3633	70.4296	77.7105	78.7699	78.555	82.8455	83.7643	84.6545	87.0891	80.4025	84.2811	81.6666	85.3313	82.7101	79.6922	79.7291	80.427	79.4133	80.166	77.3566	81.7966	78.9549	74.4093	77.6725	80.8837	82.8265	78.3433	76.4076	78.7875	74.1245	80.6022	79.6525	81.5834	80.2503	4.63241	4.08185
82.186	82.502	82.8571	87.2401	87.392	85.6638	83.109	80.1741	78.5806	77.2268	78.6086	77.4763	73.6086	71.3222	76.1334	69.4759	80.1791	80.1959	80.4331	84.5977	85.1821	84.9484	86.3628	82.4177	84.177	82.3814	83.1895	80.622	80.1995	79.8844	79.6136	78.5477	81.0152	77.608	83.9677	81.4091	75.0636	78.9741	83.4352	85.1696	76.9044	75.0319	77.7688	74.1138	80.408	79.6126	81.4072	80.1131	4.24038	4.2585
79.7394	80.4054	80.9093	85.1927	84.692	84.567	82.5533	78.8572	76.8989	75.8859	77.1089	75.1597	72.8131	70.5004	75.7144	68.5196	82.091	80.6764	81.6131	84.6508	84.7758	83.6693	84.9014	82.4524	83.3249	82.2428	81.2422	78.8287	79.8142	79.1924	78.7347	77.6599	80.9378	77.3181	85.9835	83.8451	75.1705	79.6259	85.6067	86.65	75.1374	73.8206	76.5906	73.9125	79.5814	78.9004	80.9962	79.6117	4.09317	4.24276
77.9559	78.657	79.1389	83.2164	82.245	82.6878	81.548	77.4602	75.3062	74.5176	75.9377	73.5393	71.8646	69.6007	75.0463	67.6337	83.0504	80.2426	81.8662	83.1771	83.1839	81.8551	83.2896	81.1976	82.2407	81.4927	79.6212	77.4049	78.8781	78.0038	77.7974	76.7454	80.1413	76.6495	87.8039	86.2267	74.7489	79.5825	87.1811	86.6698	73.3569	72.8539	75.3592	73.5049	78.452	77.8312	80.4172	78.7978	4.10514	4.09475
77.2045	77.288	77.6606	81.4052	80.2061	80.7718	80.2705	76.1514	73.9833	73.3068	75.1023	72.5546	70.9029	68.7618	74.1234	66.8644	82.9628	79.2533	81.2433	80.7166	81.3647	80.1091	81.6865	79.6235	81.2338	80.5185	78.3947	76.3762	77.7629	76.6821	76.8227	75.7998	79.012	75.7996	89.1641	88.4131	73.9587	78.9959	87.6721	85.5997	71.7919	72.1407	74.1621	72.9031	77.3076	76.6934	79.6638	77.8552	4.11204	3.88648
76.9747	76.2821	76.5071	79.828	78.5685	79.0798	78.9049	75.0142	72.9846	72.3436	74.4763	72.0685	70.0321	68.0519	73.0078	66.2151	82.2062	78.0806	80.0618	78.3534	79.7354	78.6567	80.1503	78.2243	80.413	79.5854	77.5773	75.6895	76.7007	75.4623	75.847	74.8299	77.8474	74.9229	88.3439	88.3193	72.9955	78.1116	86.952	84.1842	70.5557	71.6519	73.0714	72.1505	76.274	75.6571	78.6272	76.807	4.07365	3.65882
76.8144	75.592	75.667	78.5183	77.3266	77.6901	77.6022	74.0769	72.2865	71.6428	73.9049	71.9055	69.3069	67.4862	71.8134	65.6617	81.2343	76.9476	78.6568	76.4511	78.4371	77.5606	78.7349	77.2108	79.7871	78.8076	77.1089	75.2047	75.7938	74.4537	74.9129	73.8597	76.8047	74.1122	86.6169	86.1925	72.0238	77.1427	85.7862	82.6857	69.6648	71.342	72.146	71.3223	75.4073	74.798	77.5409	75.7354	4.0182	3.44633
76.6725	75.1535	75.0968	77.4813	76.4406	76.6096	76.4626	73.3434	71.8283	71.1728	73.351	71.9029	68.7394	67.0523	70.6668	65.1723	80.2933	75.9532	77.2565	75.0851	77.4867	76.7989	77.4937	76.625	79.3252	78.2063	76.8686	74.7629	75.0668	73.6814	74.0541	72.9215	75.9443	73.4105	84.7896	83.9516	71.1558	76.2259	84.589	81.1722	69.0769	71.1601	71.4188	70.51	74.73	74.1295	76.5498	74.8117	3.96223	3.27154
76.5068	74.8984	74.7303	76.6961	75.849	75.8141	75.5337	72.8023	71.5402	70.8805	72.8486	71.9431	68.3145	66.7279	69.6625	64.7175	79.4671	75.1274	75.987	73.8072	76.837	76.3074	76.4522	76.3365	78.9836	77.7571	76.7214	74.2534	74.5053	73.1229	73.2853	72.0378	75.2727	72.8301	82.9498	81.7879	70.4491	75.4298	83.4589	79.6884	68.7243	71.0569	70.8807	69.7897	74.2227	73.632	75.6828	73.9872	3.9067	3.14291
76.4143	74.7646	74.4959	76.1204	75.4845	75.2656	74.8198	72.4218	71.3584	70.7081	72.39	71.9692	68.0072	66.4899	68.8346	64.2754	78.7674	74.4643	74.897	72.9673	76.4157	76.0093	75.5972	76.127	78.7165	77.418	76.557	73.6271	74.075	72.7327	72.6024	71.2129	74.7671	72.3674	81.179	79.7746	69.9152	74.7747	82.4075	78.298	68.5345	70.991	70.4917	69.1984	73.8596	73.2714	74.9338	73.272	3.85574	3.05691
76.3733	74.7002	74.3346	75.7008	75.2851	74.9195	74.2957	72.159	71.2338	70.6033	71.9373	71.9757	67.7908	66.3164	68.1657	63.8324	78.1797	73.9396	73.9787	72.2017	76.1514	75.8357	74.895	75.8378	78.4841	77.1458	76.3052	72.8821	73.7342	72.4588	71.9905	70.4378	74.3926	72.0099	79.5509	77.9676	69.5343	74.2493	81.4597	77.069	68.443	70.9336	70.2027	68.7331	73.6002	73.0102	74.2833	72.6179	3.80769	3.00342
76.2733	74.6661	74.2039	75.3847	75.1973	74.7278	73.9176	71.9723	71.1337	70.5249	71.4628	71.9847	67.6388	66.1881	67.6142	63.3815	77.6816	73.5225	73.1928	71.7149	75.9845	75.7337	74.3088	75.4334	78.2566	76.9036	75.939	72.0482	73.4461	72.2544	71.4306	69.6984	74.1136	71.739	78.1168	76.4111	69.2715	73.8265	80.6627	76.0299	68.399	70.8678	69.9685	68.3693	73.3996	72.814	73.7107	72.0389	3.7547	2.97099
76.1898	74.6368	74.0744	75.1295	75.1764	74.6415	73.6296	71.8251	71.0368	70.4464	70.957	72.0296	67.5249	66.0886	67.1333	62.9189	77.2502	73.1824	72.4933	71.1331	75.869	75.6658	73.8086	74.9361	78.0186	76.6624	75.463	71.1669	73.185	72.0838	70.905	68.9823	73.8993	71.5332	76.8981	75.1267	69.0858	73.4752	80.0281	75.1255	68.3667	70.7867	69.7534	68.0752	73.2366	72.6548	73.1949	71.4954	3.70461	2.94991
76.1831	74.5967	73.9331	74.9043	75.1858	74.6149	73.3784	71.6858	70.9298	70.3548	70.4117	72.1347	67.4252	66.0034	66.6811	62.4409	76.8668	72.8932	71.8464	70.4936	75.7738	75.6069	73.375	74.3677	77.7702	76.406	74.8939	70.2857	72.9349	71.9234	70.4008	68.2849	73.7262	71.3728	75.8899	74.1048	68.9387	73.1692	79.49	74.2397	68.3231	70.6884	69.5338	67.8192	73.0961	72.5118	72.7122	70.9783	3.66705	2.93381
76.1093	74.5388	73.7785	74.6889	75.1965	74.6104	73.1307	71.5314	70.8056	70.2471	69.8104	72.3049	67.3211	65.9185	66.2269	61.9413	76.5173	72.637	71.2319	69.7751	75.6813	75.5409	72.9991	73.7627	77.5175	76.1351	74.2538	69.4436	72.685	71.7595	69.9113	67.6087	73.5776	71.2421	75.0717	73.3087	68.8011	72.8894	78.9475	73.266	68.2557	70.5724	69.2997	67.5752	72.9516	72.3719	72.2419	70.4733	3.6342	2.92059
76.0009	74.4622	73.6071	74.4735	75.1897	74.6026	72.8761	71.3567	70.6629	70.1233	69.1265	72.522	67.1994	65.8216	65.7545	61.4125	76.1909	72.4033	70.6337	68.7222	75.5828	75.4574	72.6785	73.1643	77.2623	75.8645	73.5701	68.6431	72.4266	71.5854	69.4331	66.9581	73.443	71.1299	74.4141	72.6886	68.6555	72.6241	78.3363	72.1591	68.1606	70.438	69.0537	67.3262	72.7977	72.2284	71.7713	69.9479	3.60968	2.91145
75.904	74.3701	73.4047	74.2571	75.1575	74.5777	72.6151	71.1743	70.5063	69.9826	68.3113	72.7435	67.0526	65.7036	65.2569	60.848	75.8804	72.1835	70.0387	67.5976	75.4733	75.3496	72.4094	72.6012	77.0025	75.6073	72.8689	67.8493	72.1539	71.3984	68.9651	66.3386	73.3164	71.0277	73.8862	72.1958	68.495	72.3647	77.6511	70.9363	68.0394	70.2841	68.8064	67.0629	72.6347	72.0772	71.2922	69.4186	3.59669	2.90796
75.944	74.2671	73.1362	74.0431	75.1007	74.533	72.3504	71.0035	70.3439	69.8241	67.3253	72.9148	66.8782	65.5591	64.726	60.2452	75.5827	71.9737	69.4383	66.1346	75.3487	75.2148	72.1775	72.0791	76.7395	75.3619	72.1626	66.995	71.8658	71.1976	68.5074	65.7584	73.1955	70.9294	73.4563	71.7904	68.3188	72.1023	76.8978	69.659	67.8959	70.1122	68.57	66.7796	72.474	71.9159	70.7953	68.8548	3.60595	2.91033
75.9342	74.1571	72.7351	73.8322	75.0255	74.4737	72.0853	70.8596	70.1819	69.6483	66.1678	72.9898	66.6768	65.3863	64.1522	59.6116	75.2959	71.775	68.8269	65.0467	75.2066	75.0558	71.955	71.5937	76.4803	75.1174	71.4404	65.9632	71.5653	70.9838	68.0593	65.2287	73.0796	70.8299	73.0913	71.4402	68.1302	71.8285	76.0528	68.4192	67.7349	69.9272	68.3518	66.4722	72.301	71.7439	70.2653	68.3143	3.61962	2.91817
76.0059	74.0418	72.0931	73.6082	74.9396	74.4061	71.8256	70.7454	70.0209	69.4575	64.8639	72.9415	66.4456	65.1865	63.5257	58.9702	75.0152	71.5859	68.1977	63.8338	75.0488	74.883	71.707	71.1276	76.2328	74.8659	70.6682	64.5578	71.2558	70.758	67.6185	64.7612	72.967	70.7245	72.7524	71.1107	67.9338	71.5356	75.095	67.3236	67.5609	69.7366	68.1515	66.1379	72.1297	71.562	69.6817	67.738	3.65108	2.93157
75.8663	73.9205	71.0492	73.3223	74.8492	74.3346	71.5813	70.6479	69.8567	69.2552	63.4452	72.765	66.1767	64.9638	62.837	58.3479	74.7305	71.3941	67.5341	62.5646	74.883	74.7098	71.404	70.6482	75.9998	74.6086	69.7989	62.4894	70.9416	70.5199	67.1853	64.3657	72.8532	70.6098	72.3898	70.7475	67.7321	71.2168	74.0437	66.4853	67.3787	69.5462	67.9664	65.7772	71.9334	71.3708	69.0214	67.1055	3.67024	2.95126
75.7721	73.7916	69.3915	72.8872	74.7561	74.2613	71.3638	70.5359	69.683	69.044	61.9227	72.4721	65.8663	64.7243	62.0772	57.7614	74.43	71.1855	66.8021	61.0843	74.7202	74.5485	71.0247	70.1074	75.7796	74.3521	68.7884	59.4151	70.628	70.2708	66.7636	64.0468	72.7321	70.4835	71.9358	70.2643	67.525	70.8694	72.957	65.974	67.1938	69.3563	67.7952	65.3929	71.7351	71.1716	68.2565	66.3583	3.70373	2.97819
75.4476	73.6541	66.8904	72.1789	74.658	74.1867	71.1821	70.3558	69.4934	68.8262	60.227	72.0781	65.5197	64.4736	61.2366	57.2129	74.1064	70.9573	65.9507	59.2182	74.5663	74.4105	70.5435	69.4756	75.5698	74.1038	67.6047	55.0505	70.3203	70.0144	66.3594	63.798	72.5995	70.3444	71.2971	69.5347	67.3098	70.4978	71.9039	65.7516	67.0123	69.1626	67.6336	64.9912	71.5094	70.9665	67.3481	65.4223	3.72024	3.01335
75.4953	73.5074	63.3533	71.044	74.5514	74.1099	71.0381	70.0183	69.2878	68.6064	58.1364	71.5979	65.1487	64.2148	60.3046	56.6863	73.7614	70.7158	64.9185	56.9539	74.4186	74.3024	69.9139	68.7624	75.3658	73.8678	66.2027	49.3479	70.0228	69.7563	65.9776	63.5997	72.4549	70.1924	70.3528	68.3913	67.0824	70.1135	70.9555	65.6451	66.8389	68.9587	67.462	64.5799	71.3116	70.7587	66.2378	64.2388	3.7819	3.05693
75.0427	73.3523	58.6939	69.3107	74.4346	74.029	70.9233	69.3852	69.0742	68.3912	55.234	71.0472	64.7669	63.9496	59.2766	56.1516	73.4068	70.4707	63.6339	53.1076	74.2716	74.2234	69.055	67.9344	75.1593	73.6417	64.4762	42.6784	69.7381	69.5011	65.6202	63.4169	72.2975	70.0278	68.9578	66.6372	66.8414	69.732	70.1501	65.3697	66.6747	68.7391	67.2318	64.1681	71.0643	70.5507	64.8412	62.6552	3.79115	3.10745
74.846	73.1902	53.0119	66.8118	74.3092	73.9426	70.8188	68.2655	68.8615	68.1858	50.9658	70.4387	64.3867	63.6788	58.1646	55.5612	73.0627	70.2318	62.0019	48.1765	74.1236	74.1664	67.8389	66.7813	74.941	73.4152	62.2414	35.8765	69.4638	69.2518	65.2832	63.1941	72.126	69.8501	66.9489	64.0637	66.5873	69.3645	69.4877	64.5809	66.5182	68.5019	66.848	63.7645	70.8387	70.3435	63.0556	60.6832	3.82746	3.16195
74.6913	73.0208	46.6574	63.4178	74.1792	73.8494	70.6943	66.4255	68.6527	67.9896	44.8685	69.7836	64.0165	63.4024	56.9984	54.8386	72.7466	70.0049	59.8826	42.0986	73.9762	74.1172	66.0964	64.8788	74.7068	73.1738	59.2721	30.0099	69.1919	69.0105	64.951	62.853	71.9424	69.6567	64.1543	60.4772	66.3217	69.0143	68.959	62.8905	66.3668	68.2479	66.1574	63.371	70.6175	70.1352	60.7901	58.2768	3.86731	3.21675
74.5397	72.8402	40.2143	59.0747	74.0462	73.7487	70.4982	63.6304	68.4429	67.7961	37.0396	69.0773	63.6605	63.1198	55.8077	53.8703	72.4656	69.7877	57.0866	33.9488	73.8301	74.0581	63.6361	61.6802	74.4568	72.9059	55.3685	25.9592	68.912	68.7781	64.5931	62.2925	71.7502	69.4424	60.4147	55.751	66.046	68.6796	68.5662	59.8526	66.2176	67.9786	64.9591	62.9756	70.3971	69.9214	58.0167	55.283	3.90717	3.2686
74.3088	72.643	34.3613	53.8419	73.9076	73.6403	70.147	59.7224	68.2243	67.5945	28.5635	68.2943	63.3186	62.8297	54.6123	52.5057	72.2172	69.5658	53.4137	26.3371	73.6824	73.9758	60.2708	56.6933	74.1911	72.6096	50.4483	24.1468	68.6168	68.5553	64.162	61.3872	71.5514	69.2011	55.6355	49.9039	65.7615	68.3566	68.2883	55.0101	66.0673	67.6943	63.0322	62.5429	70.1679	69.6969	54.8123	51.8532	3.93842	3.31624
74.0538	72.4243	29.6796	47.9298	73.7589	73.5233	69.5244	54.725	67.989	67.3721	21.1286	67.4127	62.9877	62.5308	53.4214	50.5715	71.9933	69.3163	48.7426	19.925	73.527	73.865	55.86	49.7227	73.9077	72.2946	44.6553	24.5579	68.3055	68.3405	63.5953	59.9947	71.3458	68.9283	49.8788	43.2034	65.4675	68.0396	68.037	48.1223	65.9135	67.3949	60.1692	61.9968	69.9318	69.4572	51.3357	48.0147	3.96655	3.36078
73.9209	72.1784	26.5597	41.7201	73.5954	73.3973	68.4859	48.9348	67.7309	67.1168	15.9748	66.4296	62.6634	62.221	52.2269	47.9054	71.7816	69.0162	43.1478	15.0272	73.3563	73.7239	50.3647	41.1703	73.5988	71.9731	38.4448	26.9592	67.9797	68.1274	62.8154	57.9706	71.1318	68.6221	43.4675	36.2295	65.1619	67.7186	67.6143	39.5819	65.7541	67.0795	56.227	61.2054	69.6977	69.1977	47.7572	43.9213	4.0057	3.40441
73.5148	71.8974	25.2161	35.7181	73.4138	73.262	66.8634	42.9296	67.4443	66.819	13.6045	65.3711	62.34	61.8961	50.9932	44.4084	71.5678	68.6478	36.9871	14.3876	73.1621	73.5505	43.9133	32.1872	73.2487	71.6514	32.5335	31.054	67.6374	67.9057	61.7272	55.1911	70.9055	68.2839	37.0053	29.7797	64.8397	67.3827	66.6085	30.7237	65.5875	66.7432	51.2161	59.9778	69.4238	68.9127	44.2426	40.1571	4.01343	3.44932
73.2297	71.5705	25.7278	30.4237	73.2139	73.1183	64.4776	37.44	67.1233	66.4718	14.142	64.2866	62.0086	61.552	49.6574	40.1024	71.338	68.2005	30.88	16.9839	72.9368	73.3422	36.8713	24.2391	72.8455	71.3255	27.6899	36.4394	67.2718	67.6636	60.2176	51.5936	70.6605	67.9178	31.2354	24.6163	64.4942	67.0236	64.3585	23.3495	65.4114	66.3773	45.3949	58.0802	69.1394	68.5966	40.9684	37.0504	4.03129	3.49694
72.9202	71.1857	28.0882	26.2152	72.9975	72.9685	61.1769	33.1516	66.7619	66.0713	17.5977	63.2231	61.6593	61.1875	48.1312	35.1706	71.0789	67.6735	25.5406	18.5743	72.674	73.0966	29.8389	18.3403	72.3905	70.9781	24.4928	42.6019	66.8737	67.3907	58.1616	47.2138	70.3886	67.5299	26.8029	21.2473	64.1176	66.6364	60.0852	18.689	65.2222	65.9734	39.2944	55.286	68.8259	68.2447	38.11	34.5194	4.04703	3.54704
72.4335	70.7301	32.2096	23.341	72.7664	72.8136	56.8982	30.5622	66.3533	65.6171	23.8222	62.1681	61.2837	60.8025	46.2956	29.9583	70.7742	67.0791	21.5581	20.1237	72.3668	72.8074	23.4861	14.8384	71.8881	70.5853	23.2136	49.0143	66.4324	67.0771	55.4402	42.2123	70.0793	67.1269	24.0911	19.8592	63.703	66.2177	53.2212	17.0973	65.0121	65.5258	33.5951	51.4612	68.463	67.853	35.8028	32.7851	4.04835	3.59756
72.0657	70.1919	37.8895	21.951	72.5219	72.6483	51.7364	29.9328	65.8901	65.1098	32.341	60.9842	60.8736	60.3941	44	24.9143	70.4055	66.4387	19.2803	22.6756	72.0053	72.4602	18.333	13.7119	71.3367	70.1241	23.8442	55.2382	65.9349	66.7108	51.9727	36.8957	69.722	66.7131	23.2056	20.3861	63.2449	65.7628	44.0014	18.4879	64.7707	65.03	28.9171	46.6578	68.0701	67.4167	34.1383	31.9851	4.06683	3.64498
71.4995	69.5604	44.8022	22.103	72.2626	72.4589	45.9959	31.3177	65.3639	64.5474	42.3271	59.3666	60.4197	59.9576	41.0858	20.4775	69.9566	65.7683	18.8249	26.7409	71.574	72.0325	14.6644	14.8235	70.7324	69.5758	26.2211	60.9858	65.3648	66.2796	47.7641	31.6896	69.3066	66.2872	24.0577	22.6677	62.7385	65.2633	33.9945	22.6858	64.4854	64.4801	25.6452	41.1548	67.6095	66.9283	33.2166	32.183	4.07313	3.68483
70.9401	68.8239	52.5258	23.792	71.983	72.2275	40.1814	34.6454	64.7658	63.924	52.7133	56.8437	59.9115	59.4882	37.4322	16.9646	69.4155	65.0671	20.1451	31.0514	71.0491	71.4949	12.5873	18.0896	70.0726	68.928	30.1162	66.1349	64.7029	65.7717	42.9516	27.0484	68.8228	65.8406	26.5023	26.5486	62.1779	64.7081	25.512	29.3851	64.1437	63.8708	23.8821	35.4167	67.0895	66.3768	33.1408	33.2655	4.08886	3.71249
70.169	67.9698	60.5833	26.9801	71.6733	71.937	34.8992	39.7522	64.0845	63.23	62.4128	52.8711	59.3389	58.9805	33.0191	14.5257	68.7732	64.3203	23.1251	35.7895	70.399	70.8151	12.115	23.4375	69.3578	68.1746	35.2543	70.6515	63.9281	65.1751	37.8252	23.353	68.2627	65.3585	30.4047	31.841	61.5539	64.0848	20.1554	37.9972	63.7354	63.1997	23.5359	29.9759	66.4796	65.7496	33.9391	35.1977	4.09514	3.72454
69.4322	66.9847	68.4695	31.5723	71.3199	71.5735	30.7144	46.3478	63.3046	62.4537	70.4533	47.0469	58.6943	58.4266	28.0062	13.1632	68.0216	63.5081	27.63	40.7533	69.5941	69.9685	13.2196	30.6721	68.5865	67.3134	41.331	74.3618	63.0176	64.475	32.8045	20.8498	67.6178	64.8208	35.5918	38.268	60.8538	63.3771	18.4742	47.6965	63.2543	62.4659	24.4644	25.2914	65.7906	65.0334	35.5599	37.8203	4.11661	3.72099
68.5741	65.8534	75.5643	37.381	70.9054	71.1268	28.043	53.9764	62.4051	61.5826	75.881	39.4591	57.9732	57.817	22.7683	12.7965	67.1519	62.6094	33.4567	46.2958	68.615	68.9467	15.847	39.4133	67.7466	66.3404	48.0243	76.8085	61.9447	63.6548	28.3586	19.633	66.8746	64.2025	41.8121	45.448	60.0647	62.5652	20.595	57.5939	62.6979	61.6677	26.5509	21.6542	64.9957	64.2151	37.9001	40.9509	4.14132	3.70581
67.468	64.5583	80.6224	44.1141	70.4096	70.587	27.1034	62.0545	61.3597	60.6026	77.9974	31.0274	57.1733	57.1438	17.8242	13.3376	66.1533	61.6002	40.2651	52.5836	67.4456	67.7498	19.8863	49.102	66.818	65.2434	54.9919	77.6289	60.6775	62.6959	24.8919	19.6638	66.0146	63.474	48.7373	52.8891	59.1752	61.6273	26.475	66.9839	62.0641	60.8007	29.6898	19.1738	64.069	63.2803	40.7713	44.4144	4.16181	3.68458
66.241	63.0781	81.2613	51.388	69.8132	69.9394	27.9326	69.9903	60.1376	59.4943	77.8513	23.2594	56.2924	56.4013	13.6621	14.7373	65.0132	60.4508	47.5505	57.7037	66.0659	66.3735	25.1319	59.0122	65.7839	63.9989	61.8516	77.2118	59.1834	61.5747	22.659	20.843	65.0188	62.6057	55.9623	59.9943	58.1756	60.5408	35.5059	75.4782	61.3503	59.8578	33.7476	17.8239	63.0068	62.2105	43.9197	47.9493	4.19463	3.66226
64.9204	61.3868	78.1712	58.7678	69.1016	69.1645	30.4602	77.3029	58.7043	58.2302	77.6878	17.3431	55.3243	55.5843	10.5821	16.9767	63.717	59.123	54.6586	62.1636	64.4538	64.8064	31.2954	68.1125	64.631	62.5778	68.1439	76.3565	57.4369	60.2605	21.7501	23.0844	63.8683	61.5709	63.0057	66.0525	57.0553	59.2811	46.3041	82.5527	60.553	58.8265	38.5208	17.5125	61.7969	60.9829	47.3254	51.475	4.25069	3.64499
63.5285	59.4512	74.4556	65.8151	68.263	68.2431	34.5519	83.5246	57.0266	56.7744	78.9244	13.7206	54.2561	54.6844	8.66616	20.0316	62.2467	57.5678	60.8509	66.7511	62.5823	63.0191	38.0601	74.5782	63.3454	60.9473	73.247	75.4623	55.4188	58.7171	22.1381	26.3219	62.542	60.3435	69.2916	70.253	55.7996	57.8236	56.9414	84.9679	59.6674	57.6886	43.7106	18.154	60.4251	59.5691	50.9853	54.5073	4.34376	3.64195
61.9479	57.2291	71.4394	72.072	67.2825	67.1573	39.9879	86.6732	55.0752	55.0851	82.0174	12.3548	53.0669	53.6858	7.8482	23.8351	60.572	55.7251	65.4546	69.7338	60.4023	60.9551	45.1389	76.0726	61.9111	59.0653	76.2833	74.407	53.1002	56.9066	23.7481	30.4699	61.0161	58.8945	74.0426	71.9926	54.3845	56.1496	65.5928	81.2012	58.6824	56.4179	48.9322	19.6978	58.8583	57.9338	54.5896	56.2282	4.48178	3.66711
60.3077	54.6735	69.6158	76.9098	66.1378	65.8852	46.4457	84.1565	52.8168	53.1201	85.7458	13.0539	51.7244	52.5618	8.01875	28.2528	58.6409	53.5262	68.1394	71.3912	57.8341	58.5347	52.3042	73.8836	60.3085	56.8768	76.6933	72.9828	50.4327	54.7924	26.5015	35.387	59.2585	57.188	76.3154	71.5185	52.7727	54.2377	71.0942	77.4758	57.5748	54.9799	53.7688	22.102	57.0735	56.0342	57.6948	57.0104	4.69551	3.74042
57.7017	51.7381	69.2476	79.3621	64.7955	64.3964	53.5209	80.7999	50.2082	50.8397	83.3865	15.7163	50.1821	51.2757	9.12203	33.0693	56.3787	50.9001	69.2082	71.354	54.7772	55.6712	59.3714	71.8018	58.5105	54.3212	75.3421	71.3314	47.359	52.3366	30.3107	40.8605	57.2174	55.1768	75.8882	69.8492	50.9111	52.0475	73.2312	75.7235	56.3039	53.3288	57.8545	25.2949	54.9405	53.8211	59.6803	57.7421	4.9536	3.88818
55.4371	48.3875	70.5057	78.995	63.2116	62.653	60.7705	78.2629	47.1991	48.2043	77.9941	20.2988	48.3806	49.7817	11.1737	37.9976	53.6952	47.7871	69.5056	69.8928	51.1311	52.2883	66.1628	71.609	56.4811	51.3478	73.8076	69.8265	43.826	49.4942	35.0555	46.6196	54.8211	52.7962	73.9106	67.9416	48.7359	49.5211	73.0037	76.6641	54.8087	51.4074	60.9561	29.1516	52.5207	51.2426	61.1678	58.8418	5.3638	4.1379
52.3011	44.6099	73.4619	77.0248	61.3331	60.6057	67.7714	76.7747	43.7423	45.1776	73.8323	26.6362	46.2559	48.0265	14.2021	42.7219	50.4985	44.1553	69.9401	68.612	46.8173	48.3263	72.4648	72.9314	54.1756	47.9273	73.196	68.7633	39.7939	46.2174	40.5676	52.3667	51.9891	49.9709	71.7297	66.3794	46.1793	46.5975	71.9501	80.3606	53.01	49.1485	63.0155	33.491	49.6451	48.2512	62.921	60.5511	5.87468	4.50456
49.0804	40.434	77.983	74.893	59.101	58.1905	74.1733	76.4145	39.8091	41.7346	71.2527	34.3394	43.7446	45.9523	18.184	46.9563	46.7171	40.0081	71.1459	68.9641	41.7984	43.7502	77.927	73.657	51.5455	44.0571	73.9893	68.1838	35.2516	42.4661	46.6195	57.805	48.6504	46.6348	70.189	65.5182	43.1803	43.2248	71.2114	85.026	50.8167	46.485	64.1451	38.0926	46.3359	44.8125	65.1655	62.7136	6.52627	4.97834
45.2932	35.9418	83.5889	73.3597	56.4518	55.3358	79.6888	77.2407	35.4091	37.8716	69.8376	42.8191	40.7886	43.4998	23.0052	50.5014	42.3287	35.3928	73.3684	71.0183	36.0971	38.567	81.7793	72.4968	48.5452	39.7697	75.9839	67.9645	30.2445	38.2213	52.9268	62.6543	44.7714	42.7587	69.795	65.6355	39.6964	39.3722	71.4236	84.0928	48.1356	43.3625	64.5831	42.7265	42.5238	40.9176	67.8164	64.5918	7.26777	5.52251
41.4839	31.2653	88.9493	72.7981	53.3228	51.9749	83.9215	79.2936	30.608	33.6143	69.1244	51.4368	37.3445	40.6129	28.4574	53.2858	37.3831	30.4186	76.3668	74.738	29.8188	32.8472	82.8095	70.597	45.1437	35.148	78.0922	67.936	24.8953	33.5022	59.159	66.6697	40.3827	38.3751	70.8842	66.9807	35.7182	35.0428	72.9409	79.9147	44.887	39.759	64.6156	47.1766	38.2716	36.5964	70.4837	66.4388	8.05964	6.07797
36.9847	26.5718	85.1929	73.4198	49.6617	48.0581	85.8001	82.5491	25.5387	29.0246	68.7524	59.6569	33.3963	37.2486	34.2635	55.3636	32.0072	25.2648	79.2428	80.9489	23.164	26.7362	81.5555	69.105	41.3452	30.3334	78.758	67.9474	19.4024	28.3883	64.9497	69.686	35.587	33.5883	73.5966	69.6837	31.2858	30.2921	75.9568	77.0095	41.0306	35.7027	64.4993	51.2564	33.5822	31.9281	72.0516	68.7842	8.78625	6.5705
32.5539	22.0461	81.0749	75.3337	45.4358	43.568	84.9117	86.6969	20.3922	24.2053	68.4974	67.0657	28.9699	33.3872	40.1232	56.8665	26.4009	20.1704	80.5401	81.34	16.415	20.4456	80.1	68.2209	37.2061	25.5212	77.6206	67.8909	14.0265	23.0344	69.9098	71.6819	30.5477	28.5674	77.6037	73.4449	26.502	25.241	80.1765	75.5084	36.5904	31.2792	64.4249	54.8183	28.64	27.0423	73.1803	70.8062	9.37214	6.92101
28.0331	17.8726	78.1063	78.4783	40.647	38.5331	83.3417	87.7886	15.3914	19.3004	68.2863	73.2952	24.1475	29.0457	45.7548	57.951	20.8268	15.4081	79.6466	79.2134	9.893	14.2277	79.5682	67.7417	32.8364	20.9489	75.7566	67.729	9.07068	17.6609	73.662	72.8253	25.4658	23.5239	81.5916	77.0289	21.533	20.0763	83.0273	74.8544	31.6688	26.6313	64.4964	57.7731	23.5921	22.1117	73.9307	72.2435	9.70966	7.06001
23.5274	14.2249	76.2667	82.4062	35.3561	33.0416	82.2801	83.6072	10.7623	14.4896	68.1261	77.8866	19.0744	24.2902	50.9075	58.7688	15.5862	11.2454	77.6866	75.7157	3.91039	8.34397	80.3181	67.4507	28.3979	16.8714	74.0526	67.4863	4.84901	12.524	75.9599	73.4404	20.5555	18.6805	82.7517	78.3246	16.6009	15.0361	80.9629	74.5562	26.4468	21.9464	64.6827	60.1145	18.6424	17.3358	73.9995	72.7052	9.72639	6.94611
19.315	11.2623	75.2184	85.4946	29.6993	27.2502	82.0249	79.8514	6.71536	9.97967	68.0385	80.3638	13.9538	19.2457	55.3613	59.4522	10.9769	7.9012	75.7554	74.5258	-1.25459	3.04442	82.2068	67.2506	24.1034	13.524	72.7813	67.2138	1.64656	7.88658	76.9264	73.8953	16.0282	14.2466	80.3599	76.7432	11.9693	10.388	77.7464	74.3278	21.1645	17.4343	64.7991	61.9168	14.0289	12.9239	73.7471	72.8214	9.40143	6.58581
15.0613	9.12407	74.6679	84.461	23.8844	21.384	82.6755	76.9729	3.4323	5.99248	68.0049	81.0581	9.0293	14.0978	58.9451	60.1017	7.25185	5.51617	74.2405	73.1177	-5.35712	-1.43725	84.2039	67.1218	20.1985	11.0803	71.9108	66.954	-0.326495	3.99559	77.1138	74.4828	12.0893	10.4133	77.2508	74.0992	7.91626	6.40193	75.7195	74.0677	16.0847	13.3072	64.6878	63.2937	9.93312	9.0796	73.5837	72.3391	8.73035	6.0505
10.7199	7.90274	74.3722	81.1853	18.1776	15.7263	84.2943	74.9406	1.04874	2.74708	67.9459	81.4	4.55609	9.07683	61.585	60.7805	4.59177	4.13902	73.1599	71.7989	-8.18441	-4.88566	83.9861	67.0387	16.9169	9.60882	71.3246	66.7266	-0.991866	1.059	77.1666	75.3332	8.94034	7.35852	74.7556	71.7526	4.69555	3.31943	74.7987	73.7801	11.4586	9.76113	64.3706	64.3434	6.53902	5.98302	73.4327	71.7345	7.78051	5.4849
6.69684	7.6017	74.1615	78.2093	12.8846	10.6076	86.7031	73.6042	-0.371276	0.431901	67.7606	82.706	0.773921	4.43036	63.3456	61.5062	3.08099	3.72101	72.4149	71.3764	-9.59687	-7.11858	81.3986	66.9492	14.4345	9.06415	70.902	66.5365	-0.436035	-0.787551	77.4845	76.3376	6.76015	5.2425	73.0473	70.0622	2.49476	1.31943	74.4706	73.4871	7.50171	6.95939	63.9492	65.1308	4.0203	3.77018	73.2398	71.4459	6.72416	5.08648
5.7554	8.13182	73.9364	75.9782	8.33091	6.37799	89.5137	72.7761	-0.853233	-0.834476	67.3885	85.6317	-2.10766	0.401285	64.4122	62.2265	2.69024	4.13382	71.8918	71.3777	-9.59172	-8.03268	78.4336	66.8208	12.8392	9.32302	70.5368	66.3667	1.12106	-1.51626	78.1004	77.0753	5.65469	4.17325	71.9775	68.9619	1.40454	0.480431	74.3329	73.1859	4.37982	5.01113	63.4908	65.7173	2.69302	2.51358	73.0922	71.4653	5.88553	5.01749
6.98947	9.35419	73.6585	74.4526	4.82724	3.35174	86.3062	72.2666	-0.502041	-1.03832	66.8186	88.6276	-3.92594	-2.7845	65.005	62.7897	3.2976	5.20992	71.4948	70.721	-8.31268	-7.6471	75.9668	66.6431	12.1161	10.2374	70.1429	66.1712	3.4087	-1.21393	78.6528	76.9569	5.61461	4.16689	71.3459	68.2829	1.4054	0.762015	74.1874	72.8569	2.19635	3.94959	63.0198	66.2026	2.46499	2.21345	72.418	71.4519	5.45619	5.28315
8.99331	11.1264	73.3379	73.4704	2.61409	1.73775	82.86	71.9172	0.536997	-0.270426	66.0725	83.5429	-4.60094	-4.93064	65.2779	62.9835	4.74282	6.78403	71.1597	69.9927	-5.99709	-6.09935	74.1725	66.4282	12.1664	11.6748	69.6523	65.8831	6.17681	-0.0526359	78.5535	75.7734	6.51974	5.14274	70.9684	67.8635	2.38496	2.02779	73.9778	72.4928	0.971677	3.72293	62.5481	66.7277	3.13716	2.80576	71.6892	70.6432	5.42847	5.73196
11.0992	13.3282	73.0105	72.8558	1.79615	1.58481	79.825	71.6205	2.12154	1.30685	65.1971	78.1482	-4.16411	-5.90042	65.2741	62.6947	6.87124	8.71971	70.8602	69.6204	-2.90604	-3.60425	72.9699	66.2218	12.8535	13.5368	69.0119	65.4663	9.23612	1.76107	77.5088	73.9294	8.18493	6.95298	70.6865	67.5755	4.17619	4.09244	73.6992	72.1089	0.63382	4.21715	62.0837	67.403	4.5366	4.1814	70.9206	69.7859	5.59361	6.18545
12.9445	15.8691	72.7139	72.4573	2.30694	2.77618	77.4058	71.3218	4.13906	3.504	64.2529	73.9628	-2.74813	-5.66001	64.961	62.0063	9.54635	10.921	70.5924	69.2132	0.727798	-0.407809	72.1963	66.0435	14.0414	15.7554	68.1857	64.9379	12.4761	4.03487	75.8057	71.9623	10.412	9.42107	70.3616	67.3287	6.59413	6.76355	73.3473	71.7084	1.04382	5.29221	61.6287	68.178	6.49854	6.20632	70.1319	69.0109	5.74876	6.53148
14.9736	18.6803	72.4669	72.1626	3.93951	5.07829	75.5913	71.0012	6.51293	6.1424	63.2949	71.1908	-0.544971	-4.29686	64.3071	61.1222	12.643	13.3322	70.3547	69.4446	4.72451	3.25321	71.6761	65.8802	15.6146	18.2826	67.1693	64.3269	15.8562	6.62575	73.9234	70.1996	13.0245	12.3738	69.8717	67.059	9.46251	9.87005	72.9057	71.2555	2.03785	6.82015	61.1803	68.8201	8.93129	8.74198	69.3401	68.4057	5.87985	6.73658
17.2685	21.7057	72.2596	71.9023	6.41663	8.20701	74.3014	70.6581	9.19224	9.07538	62.3381	69.56	2.24068	-1.99758	63.3451	60.2327	16.0434	15.9292	70.1393	69.5075	8.95958	7.18731	71.2496	65.7259	17.4825	21.0791	65.9994	63.6633	19.3702	9.45419	72.1895	68.7643	15.8882	15.6616	69.1089	66.7071	12.6325	13.2779	72.3715	70.6804	3.46448	8.70532	60.7272	69.1335	11.7235	11.6623	68.5482	67.8668	5.99635	6.82074
19.6613	24.8958	72.0475	71.6437	9.46646	11.8891	73.4275	70.3078	12.1357	12.1996	61.3727	68.6581	5.42225	0.996189	62.2026	59.439	19.6422	18.7049	69.9315	69.4432	13.3521	11.268	70.7963	65.6095	19.5826	24.1073	64.7309	62.9698	23.0093	12.4975	70.7509	67.6556	18.9166	19.1676	67.9855	66.2032	15.9925	16.888	71.7336	69.914	5.20908	10.8884	60.2508	69.1128	14.7627	14.8638	67.7482	67.3597	6.10955	6.82677
22.736	28.2082	71.7569	71.3757	12.8757	15.905	72.8443	69.9744	15.3003	15.456	60.3842	68.1138	8.84598	4.43527	61.0578	58.7673	23.3547	21.657	69.7094	69.2055	17.8489	15.4252	70.2452	65.5713	21.8801	27.3296	63.4092	62.2438	26.745	15.7676	69.6319	66.8067	22.0615	22.8082	66.4467	65.4657	19.466	20.6238	70.9251	68.9408	7.20524	13.34	59.7375	68.8676	18.0291	18.2687	66.9225	66.8484	6.28619	6.79723
25.9668	31.6116	71.3057	71.0919	16.5093	20.1078	72.4317	69.6709	18.6367	18.8135	59.3724	67.6762	12.3954	8.106	60.0494	58.2066	27.1264	24.7799	69.4432	68.6947	22.4163	19.6245	69.5643	65.6032	24.3614	30.7076	62.0712	61.4876	30.5307	19.2792	68.7858	66.1223	25.298	26.5302	64.4867	64.4106	22.9991	24.4246	69.8327	67.8009	9.4289	16.0514	59.1849	68.5063	21.4244	21.8215	66.048	66.2974	6.48467	6.76159
29.5037	35.0859	70.6216	70.777	20.2979	24.4172	72.098	69.3876	22.0908	22.2462	58.3624	67.2314	15.9938	11.8605	59.2233	57.7301	30.9299	28.0607	69.0957	68.4496	27.0386	23.8496	68.7422	65.6377	27.0231	34.2047	60.7484	60.714	34.3149	23.0283	68.134	65.5075	28.6156	30.3024	62.1513	62.9835	26.5508	28.2396	68.3969	66.5593	11.8819	19.0243	58.5975	68.0973	24.931	25.4836	65.1065	65.7341	6.70565	6.73312
32.9529	38.6202	69.6609	70.4052	24.2089	28.7942	71.7879	69.0973	25.6102	25.7211	57.3819	66.7341	19.5991	15.6189	58.5567	57.3036	34.7539	31.4762	68.6236	68.5038	31.7109	28.0928	67.7813	65.6011	29.8598	37.7912	59.4554	59.9425	38.0553	26.9856	67.5925	64.8885	32.0118	34.1057	59.5185	61.1814	30.0917	32.0264	66.7053	65.2678	14.5744	22.2594	57.9869	67.6761	28.4935	29.2265	64.0955	65.1456	6.90782	6.7141
36.1611	42.2095	68.4211	69.9478	28.2224	33.2134	71.4759	68.7563	29.1476	29.1956	56.4487	66.132	23.1907	19.3522	58.0104	56.8901	38.59	34.9961	67.9792	67.8643	36.428	32.3448	66.7084	65.4512	32.8563	41.4478	58.1846	59.2054	41.7244	31.1001	67.0851	64.2298	35.4837	37.9222	56.6821	59.0409	33.6042	35.7551	64.9189	63.9622	17.513	25.7458	57.3723	67.2589	32.0838	33.0257	63.0261	64.4308	7.07222	6.70388
39.3202	45.8513	66.9351	69.3778	32.3201	37.6512	71.1537	68.2999	32.6667	32.6272	55.5506	65.3383	26.7588	23.0609	57.5484	56.4556	42.4277	38.5881	67.1164	67.0134	41.1789	36.59	65.5752	65.1485	35.9898	45.1628	56.9252	58.5202	45.3128	35.3089	66.5515	63.5393	39.0249	41.7343	53.7383	56.617	37.0842	39.413	63.1895	62.71	20.6941	29.4565	56.7796	66.8533	35.7071	36.8586	61.9149	63.6248	7.20827	6.70291
42.6443	49.541	65.2565	68.6721	36.4813	42.0818	70.8151	67.6441	36.1468	35.986	54.6551	64.2575	30.2975	26.7595	57.1317	55.9759	46.2523	42.2201	66.0003	66.049	45.9486	40.811	64.4371	64.6135	39.239	48.9227	55.6783	57.8725	48.8231	39.5506	65.9499	62.8505	42.6209	45.5262	50.764	53.9757	40.5391	42.9982	61.6012	61.5989	24.0989	33.3535	56.2333	66.4647	39.372	40.7046	60.7748	62.7249	7.32755	6.71143
46.09	53.2676	63.4443	67.814	40.6848	46.4791	70.4426	66.6974	39.5822	39.2573	53.7449	62.8508	33.8039	30.4619	56.71	55.4383	50.0425	45.8607	64.6164	64.9685	50.7219	44.9976	63.3421	63.7415	42.5878	52.7062	54.4509	57.2317	52.2613	43.778	65.2616	62.1943	46.248	49.2841	47.8085	51.1851	43.9824	46.5075	60.1781	60.65	27.6961	37.3921	55.7422	66.0974	43.0637	44.5447	59.6129	61.7154	7.42969	6.72845
49.2793	57.0142	61.5524	66.7929	44.9126	50.822	69.997	65.3748	42.9731	42.432	52.8269	61.181	37.2805	34.1744	56.231	54.8336	53.7657	49.4746	62.9763	64.0434	55.4829	49.1484	62.3345	62.464	46.0224	56.486	53.254	56.5624	55.6286	47.9624	64.4893	61.5842	49.8795	52.9934	44.8957	48.3014	47.4202	49.9285	58.9169	59.8108	31.4508	41.5247	55.2869	65.7492	46.736	48.36	58.4328	60.6089	7.50239	6.75303
52.7733	60.7584	59.6213	65.6038	49.1456	55.0972	69.4119	63.605	46.3132	45.4976	51.9093	59.3968	40.7348	37.893	55.6551	54.1467	57.3724	53.0184	61.104	63.1696	60.213	53.2669	61.4436	60.7809	49.5258	60.2336	52.0993	55.8214	58.916	52.0934	63.6447	61.0177	53.4936	56.6417	42.0283	45.3628	50.8376	53.2395	57.783	59.0186	35.3361	45.7048	54.8253	65.4069	50.4237	52.1313	57.2296	59.3937	7.56437	6.78642
56.1069	64.4732	57.666	64.2505	53.3576	59.2993	68.5971	61.3376	49.5861	48.4376	50.9758	57.6526	44.1767	41.5979	54.9533	53.3487	60.7917	56.4418	59.0164	62.5875	64.8912	57.3571	60.6594	58.7408	53.0734	63.9238	50.9838	54.9595	62.0982	56.171	62.736	60.4805	57.0812	60.2195	39.1972	42.3978	54.1962	56.4157	56.7095	58.2308	39.3368	49.8881	54.3185	65.0513	54.0633	55.8386	55.983	58.0943	7.59286	6.83513
59.8066	68.132	55.675	62.7388	57.5112	63.4264	67.4501	58.5561	52.7721	51.2362	49.9854	56.0077	47.6121	45.2487	54.0972	52.3918	63.9316	59.6936	56.7217	61.8968	69.4865	61.4245	59.9208	56.3599	56.6357	67.5369	49.8857	53.9318	65.1253	60.1919	61.7639	59.9482	60.6483	63.7151	36.3885	39.4258	57.4389	59.4356	55.6043	57.4044	43.4448	54.033	53.7487	64.6591	57.6739	59.4613	54.6583	56.6655	7.59283	6.9121
63.3965	71.712	53.6205	61.0621	61.5647	67.4749	65.8719	55.2844	55.8526	53.8854	48.876	54.4191	51.0329	48.7865	53.0483	51.2106	66.6799	62.7267	54.2171	61.0376	73.9438	65.4721	59.1217	53.5786	60.1921	71.056	48.7754	52.7092	67.9022	64.1376	60.7179	59.3851	64.2048	67.1059	33.5854	36.4529	60.4923	62.2769	54.3693	56.4795	47.6559	58.1072	53.1167	64.1943	61.1743	62.9765	53.2109	55.0739	7.53827	7.03362
67.395	75.1945	51.4711	59.1955	65.4885	71.4317	63.7811	51.5877	58.81	56.3894	47.5733	52.7867	54.4103	52.1406	51.7524	49.7324	68.9047	65.4919	51.4886	59.904	78.161	69.4889	58.1234	50.283	63.7385	74.4518	47.6236	51.2635	70.2824	67.9566	59.5731	58.7468	67.7434	70.3471	30.772	33.4799	63.2714	64.9017	52.9305	55.3779	51.9676	62.0903	52.4203	63.6032	64.5612	66.3532	51.5918	53.2691	7.4339	7.21248
70.8715	78.559	49.1965	57.1046	69.2759	75.2637	61.1233	47.5727	61.624	58.7629	46.0214	50.9817	57.6899	55.2362	50.1424	47.8849	70.4734	67.9167	48.5177	58.1852	81.8941	73.4225	56.7701	46.3692	67.2754	77.6586	46.3984	49.5579	72.0952	71.5451	58.2913	57.9801	71.2149	73.3541	27.9366	30.5083	65.6828	67.2402	51.2272	54.0146	56.3737	65.9656	51.6197	62.8133	67.6792	69.5386	49.7495	51.1793	7.23206	7.45052
74.0643	81.7669	46.7689	54.759	72.9313	78.8845	57.88	43.3677	64.268	61.0245	44.2009	48.894	60.7887	58.0061	48.1449	45.6007	71.3016	69.8965	45.2881	56.6778	84.3785	77.13	54.9061	41.8076	70.7911	80.5311	45.061	47.5545	73.1895	74.7161	56.8265	57.0256	74.491	75.9768	25.0738	27.5357	67.6327	69.1842	49.2033	52.3136	60.8571	69.7102	50.6194	61.733	70.4267	72.4388	47.6339	48.8426	6.85137	7.72559
77.3993	84.6905	44.1593	52.1456	76.4394	82.0544	54.08	39.0829	66.7058	63.1876	42.107	46.4282	63.5897	60.4069	45.6922	42.8298	71.4043	71.2978	41.7927	54.9528	84.1819	80.2691	52.3992	36.6374	74.2415	82.718	43.5668	45.2271	73.5073	77.151	55.1319	55.8181	77.3062	77.9769	22.1851	24.5515	69.045	70.6041	46.7948	50.1984	65.3833	73.2914	49.2735	60.2575	72.6549	74.8771	45.1984	46.1936	6.16135	7.95464
80.4487	86.8438	41.3336	49.2731	79.6937	84.1054	49.8021	34.792	68.8882	65.2484	39.7252	43.4393	65.9469	62.4332	42.736	39.5521	70.9109	71.9791	38.0382	52.9067	81.802	82.0917	49.1699	30.9338	77.5187	83.5488	41.8702	42.5706	73.1524	78.4253	53.1652	54.2861	79.2105	79.0576	19.2801	21.5399	69.8875	71.3929	43.9382	47.5812	69.8904	76.6577	47.4027	58.283	74.3045	76.5258	42.4056	43.1962	5.55365	7.91863
83.4002	86.7865	38.2531	46.1699	82.3289	83.9973	45.1668	30.5373	70.7589	67.1797	37.0251	39.7954	67.715	64.1142	39.2655	35.7897	70.0236	71.8602	34.0459	50.6674	78.8771	81.7774	45.2223	24.772	80.3886	82.695	39.9262	39.5863	72.3738	78.3025	50.8938	52.3536	79.7166	79.0419	16.3763	18.49	70.1961	71.5299	40.5971	44.3892	74.2683	79.7125	44.8412	55.7274	75.4588	76.9997	39.2376	39.8435	5.609	7.29411
85.8116	84.9551	34.885	42.8825	83.4882	82.0754	40.3177	26.3382	72.2761	68.9378	33.9727	35.4671	68.8051	65.4887	35.3192	31.6192	68.9518	71.0057	29.8537	48.0287	76.1183	79.7501	40.6664	18.2375	82.381	80.8606	37.6834	36.2757	71.469	77.0698	48.3013	49.9538	78.7919	78.0781	13.4929	15.4003	70.0854	71.1232	36.754	40.6032	78.3182	82.2574	41.506	52.562	76.0451	76.5093	35.7047	36.1244	6.14037	6.36903
86.8171	82.98	31.2157	39.4701	82.5798	79.6084	35.3916	22.2	73.4394	70.4837	30.5285	30.5448	69.2385	66.5836	30.9899	27.1731	67.8666	69.6319	25.5132	45.0265	73.8318	77.115	35.7282	11.501	82.88	78.8782	35.0796	32.6414	70.7002	75.3181	45.3973	47.0515	76.9781	76.5526	10.6386	12.2793	69.7312	70.3891	32.4136	36.2588	81.6598	83.9123	37.4411	48.8444	75.9748	75.5866	31.8488	32.0901	6.56608	5.69118
85.5711	81.3336	27.2541	35.9931	80.4578	77.2705	30.4971	18.112	74.3088	71.8123	26.6524	25.2542	69.1527	67.4194	26.4213	22.6212	66.891	68.0284	21.0913	41.3009	72.2028	74.5606	30.7221	4.88303	81.9002	77.2412	32.0528	28.6881	70.2597	73.5554	42.2268	43.6645	74.889	74.8461	7.8086	9.14279	69.3255	69.5785	27.6267	31.4226	83.5834	84.2663	32.8236	44.7149	75.322	74.5375	27.7433	27.7998	6.51625	5.30782
83.6371	80.2113	23.0363	32.5032	78.1737	75.3587	25.7082	14.0496	75.0027	72.976	22.3421	19.9083	68.7507	68.0351	21.7816	18.1357	66.1169	66.4795	16.686	37.0091	71.3573	72.4388	25.9811	-1.19045	80.2324	76.226	28.5562	24.4237	70.2672	72.1086	38.8731	39.8773	72.9465	73.2392	4.993	6.00457	69.0321	68.9092	22.5046	26.1816	83.542	83.5283	27.9287	40.3592	74.4599	73.5919	23.4901	23.3874	6.12594	5.09936
81.6101	79.725	18.6387	29.0368	76.2834	74.0221	21.0619	9.98791	75.6669	74.0804	17.6642	14.7963	68.2311	68.5167	17.2239	13.8553	65.629	65.2261	12.4408	32.6185	71.3686	70.955	21.7567	-6.32435	78.5729	75.9726	24.5792	19.8725	70.777	71.1684	35.4488	35.8345	71.4176	71.9265	2.17867	2.86889	68.9593	68.5399	17.2239	20.6515	82.3022	82.4256	23.0463	35.9648	73.7107	72.9598	19.2057	19.0148	5.54588	5.04196
80.2361	79.9426	14.1675	25.6165	75.0751	73.3328	16.5656	5.92072	76.4282	75.2449	12.7543	10.0872	67.7391	69.0051	12.8572	9.86404	65.5203	64.4513	8.53958	27.5479	72.2494	70.2346	18.1469	-10.3229	77.3201	76.491	20.1777	15.0912	71.7841	70.8316	32.0693	31.7102	70.4774	71.0424	-0.640907	-0.264885	69.1447	68.5698	12.0266	14.9634	80.9751	81.5091	18.3834	31.6813	73.359	72.7868	15.0043	14.7177	5.06121	5.12143
78.8755	80.8838	9.7439	22.2603	74.7034	73.3092	12.2209	1.87126	77.3556	76.5465	7.81842	5.82443	67.3416	69.6527	8.73693	6.18536	65.889	64.2725	5.17826	22.5844	73.9443	70.334	15.0924	-13.2965	76.6992	77.6512	15.5053	10.1972	73.2191	71.1238	28.8162	27.6587	70.237	70.6766	-3.45276	-3.38472	69.5471	69.0498	7.12904	9.28983	80.088	81.0401	14.0244	27.5915	73.4454	73.14	10.983	10.6165	4.70337	5.2905
78.3963	82.4987	5.50449	18.99	75.227	73.9288	8.04611	-2.10496	78.4327	77.9565	3.11997	1.99196	67.0214	70.5324	4.87398	2.78863	66.8067	64.7338	2.5291	17.5405	76.3278	71.2336	12.4305	-15.6606	76.8159	79.2052	10.8195	5.36661	74.9417	72.0074	25.716	23.7775	70.7366	70.8745	-6.22131	-6.44149	70.0475	69.994	2.62262	3.86431	79.7958	81.0492	9.95334	23.7109	74.0499	74.0013	7.21766	6.71122	4.63677	5.47721
[truncated: 2 more columns]
