# Supplementary material for: Effects of knee sleeves on coordination of lower-limb segments in healthy adults during level walking and one-leg hopping
Source: PeerJ. 2017 May 18;5:e3340. doi: 10.7717/peerj.3340 (PMC5438577; doi:10.7717/peerj.3340)
Supplement: Supplemental Information 2 [file peerj-05-3340-s002.xlsx]

## Sheet: crpts
SUB1				SUB2				SUB3				SUB4				SUB5				SUB6				SUB7				SUB8				SUB9				SUB10				SUB11				MEAN				SD
gait	gait_sleeve	onehop	onehop_sleeve	gait	gait_sleeve	onehop	onehop_sleeve	gait	gait_sleeve	onehop	onehop_sleeve	gait	gait_sleeve	onehop	onehop_sleeve	gait	gait_sleeve	onehop	onehop_sleeve	gait	gait_sleeve	onehop	onehop_sleeve	gait	gait_sleeve	onehop	onehop_sleeve	gait	gait_sleeve	onehop	onehop_sleeve	gait	gait_sleeve	onehop	onehop_sleeve	gait	gait_sleeve	onehop	onehop_sleeve	gait	gait_sleeve	onehop	onehop_sleeve	gait	gait_sleeve	onehop	onehop_sleeve	gait	gait_sleeve
19.2884	2.70631	47.0348	40.8521	22.584	21.5374	51.8919	50.0101	14.4645	18.7175	42.4287	16.108	31.2163	28.8354	42.0997	39.9946	10.6027	15.4566	38.5103	3.52117	14.6208	11.8605	51.1404	18.1795	1.53942	10.0115	32.7373	36.2747	10.1017	22.9651	46.444	36.0409	1.68868	7.92234	40.9237	51.2073	-17.8671	0.841102	28.8209	31.6772	9.74979	14.2049	37.4145	4.80809	10.7263	14.0962	41.7678	29.8794	12.8371	8.60069
14.1219	3.99735	48.8456	42.68	20.1714	17.9611	53.8782	51.4567	17.8884	19.2979	49.6152	20.1633	27.3433	26.5203	44.8307	41.9481	16.8414	19.7425	44.3961	6.33445	14.5075	11.6779	52.1227	23.3987	3.20066	9.16962	36.7876	39.3046	12.282	20.8387	48.2466	37.0964	1.71475	9.02328	45.4896	52.7015	-10.7687	5.10511	30.6893	34.0733	16.0706	15.9569	38.8757	9.10035	12.1248	14.481	44.8888	32.5689	10.4365	7.17083
11.3023	5.17622	50.5553	44.8864	17.3853	14.1401	56.7735	53.7563	18.7447	18.4421	57.0761	26.3099	20.6783	22.1771	48.4219	44.2854	20.9534	22.5731	49.5025	11.4013	12.35	11.3753	53.1212	31.1093	2.91888	6.47591	41.8124	43.2066	13.0162	17.6811	50.2673	38.4001	0.331914	8.937	51.538	54.0602	-0.638848	7.59662	34.4992	37.9261	18.763	16.4792	40.9456	15.1504	12.3459	13.7322	48.5921	36.4084	8.08939	6.2211
10.8655	6.735	52.2299	47.2081	15.3039	11.1923	60.1721	56.6189	18.3144	17.0981	61.6549	33.4825	13.0656	17.0019	52.1698	47.0271	23.4563	24.6996	53.5671	14.6189	9.84405	11.8786	54.6527	39.9834	2.14894	3.43139	46.9073	47.4563	13.4971	14.9203	52.3796	39.974	-1.23587	8.54618	58.1872	55.2279	10.4313	9.14355	40.35	42.9079	18.5645	16.6336	43.7768	22.2821	12.2051	12.8437	52.368	40.617	7.1321	5.96954
1.65012	8.97876	54.0287	49.4679	14.6219	9.86127	63.6893	59.778	17.8161	16.2011	62.4054	40.1611	6.7613	12.3242	55.3018	50.0437	24.9568	26.818	56.5576	17.4873	8.41858	13.5198	57.1596	48.1527	2.39674	1.25839	51.2539	51.1209	14.6356	13.7458	54.4829	41.7941	-1.76471	8.63241	64.472	56.1256	20.8027	10.5053	47.2493	48.1118	16.7519	16.8647	47.3157	29.8852	11.5497	12.61	55.8106	44.7389	8.61652	6.3633
-5.13427	11.8414	56.1094	51.7166	15.4277	10.2774	67.0533	63.049	17.9368	16.3985	60.5058	45.0478	3.61617	9.16755	57.3008	53.1421	26.17	29.342	58.684	16.8717	8.72294	16.041	60.7545	54.1218	4.41424	0.596392	54.2009	53.6924	16.6915	14.6262	56.5711	43.7623	-0.400497	9.61589	69.4422	56.6488	29.4132	12.1206	54.0311	52.6728	14.8974	17.0337	51.2604	37.4703	11.9778	13.3692	58.7194	48.0178	10.8043	7.03415
1.63992	14.8684	58.538	54.1649	17.2544	11.9934	70.1764	66.3211	18.5924	17.7648	58.2602	47.4056	4.22883	7.86299	57.9653	56.1562	27.6081	32.1728	60.3122	17.3994	10.6509	18.8875	65.0234	57.3203	7.82912	1.42466	55.5315	55.435	19.0845	17.1285	58.7251	45.7467	2.93962	11.4082	72.24	56.6988	35.5528	14.0535	59.9289	55.9662	14.2318	16.683	55.2319	44.7535	14.5102	14.9316	61.0848	50.6698	10.6033	7.6358
13.4897	17.4004	61.2969	57.0261	19.3653	14.2837	73.1866	69.5452	19.1694	19.8369	57.5626	47.3169	7.87702	8.12741	57.3116	59.0164	29.2875	34.6975	61.8968	16.0096	13.5637	21.4789	69.2745	58.2601	11.5065	3.27772	55.5589	57.0379	20.6947	20.1543	61.057	47.7424	7.46025	13.4947	72.2166	56.3896	38.805	16.0421	64.3674	57.6264	15.0794	15.4434	58.9532	51.6735	17.8453	16.7488	62.9711	52.5131	9.35288	8.00472
28.4173	18.8136	64.3631	60.3884	21.0214	16.433	76.3086	72.7035	19.0248	21.8676	58.6177	45.6307	12.9623	9.32798	55.6589	61.8083	30.6874	36.0769	63.927	18.1879	16.5549	23.3397	73.1526	58.3501	14.1126	5.47226	54.9605	59.2394	20.6004	22.4638	63.6726	49.9592	11.7514	15.1652	69.2548	56.2561	39.2174	17.5734	66.977	57.7337	16.8176	13.2536	62.2854	58.3426	21.0152	18.1625	64.4707	54.4182	8.48307	8.09872
29.9077	18.7131	67.7566	64.1722	21.705	17.8691	79.6209	75.7295	17.9286	23.138	60.3494	43.4445	17.4514	10.6919	53.7874	65.1545	31.0302	35.684	66.7721	23.9749	18.8614	24.136	76.9498	59.0496	14.5867	7.23812	54.4784	62.4503	18.5674	23.2054	66.6921	52.748	14.3197	15.7591	64.1295	57.159	37.4123	18.0854	67.8066	56.8873	18.456	10.3506	65.285	64.9938	21.8388	18.6246	65.7844	56.8876	7.52873	7.95534
19.3122	17.0209	71.4549	68.2099	21.2857	18.2447	82.9825	78.5126	16.1715	23.2495	62.0213	41.774	19.5815	11.4969	52.8727	69.7032	29.7721	33.4432	70.4712	32.7353	20.0664	23.7156	81.3159	61.1578	12.5954	7.8804	54.7246	66.5649	15.0095	22.1796	70.2833	56.5001	14.1923	14.8678	58.6142	59.844	34.3857	17.2339	67.3499	56.0788	19.3047	7.09259	68.257	71.8864	20.1524	17.8568	67.3043	60.2697	6.58099	7.68796
14.7781	13.9791	75.2857	72.3617	19.9306	17.4624	86.2064	81.0225	14.25	22.2082	64.0283	41.4837	18.7731	11.2833	54.1534	75.443	26.942	29.7964	74.6917	45.5807	20.0095	22.1695	86.6869	64.4991	8.7073	7.02177	56.1124	71.2342	10.6746	19.7721	74.5894	61.5081	11.3426	12.4622	54.9524	64.4893	31.0539	15.0515	66.5635	56.4437	19.1546	3.76491	71.5561	79.1762	17.7833	15.9065	69.5297	64.8402	6.84341	7.4382
13.4678	10.0712	78.9609	76.5659	17.8529	15.6172	89.195	83.3232	12.4817	20.2692	66.9334	43.0593	15.7533	9.98207	57.169	82.1596	23.084	25.3624	78.8973	57.3849	18.744	19.7268	92.9712	68.3052	3.9832	4.75492	58.7594	76.1541	6.28747	16.6238	79.6195	67.8213	6.59497	8.90749	54.862	70.5804	27.8384	11.916	66.5908	58.8298	18.0283	0.521793	75.374	86.7924	14.9196	13.0684	72.6666	70.0887	7.33901	7.28112
8.94112	5.83621	82.173	80.8055	15.213	12.9466	91.9224	85.4623	10.8888	17.7413	70.5106	46.5147	11.7075	7.84081	60.8526	89.5227	18.8762	20.6672	82.5508	69.5708	16.4862	16.5772	99.6835	72.199	-0.672652	1.54573	62.5457	80.9729	2.27802	13.2739	85.2632	74.9684	1.07103	4.77314	59.0332	77.1864	24.6049	8.36644	68.1662	63.4089	16.0378	-2.57487	79.7739	94.447	11.4029	9.72669	76.5887	75.9144	7.96385	7.19128
4.39115	1.6928	84.6146	85.0069	12.1636	9.7733	94.3882	87.5015	9.31566	14.8877	74.2899	51.4653	7.48455	5.21334	66.2799	96.9826	14.7786	16.0851	85.3028	81.1082	13.4956	12.8788	106.259	76.5861	-4.79107	-2.04661	67.2658	85.24	-1.31666	9.99846	91.367	83.0498	-4.31609	0.538466	66.8527	83.3346	21.0073	4.87765	71.3312	69.6753	13.4216	-5.5193	84.7262	101.796	7.78493	6.21634	81.1525	81.977	8.41831	7.10936
-0.0893814	-2.10447	85.9751	88.96	8.90795	6.41227	96.6421	89.6212	7.59043	11.9021	78.3274	57.1866	3.448	2.38133	73.356	103.986	10.9889	11.8539	87.1529	90.9549	10.0357	8.87655	112.222	81.9645	-8.25747	-5.6041	72.6285	88.6033	-4.70971	6.85578	97.7595	88.948	-9.05961	-3.54203	76.1951	88.2471	16.9019	1.7183	75.5194	76.7971	10.4713	-8.3182	90.0251	108.573	4.20254	2.7665	85.9821	87.622	8.62452	7.00782
-3.43087	-5.44367	85.9984	92.3662	5.70855	3.10728	98.8741	92.0143	5.59975	8.91385	82.8587	63.0687	-0.305959	-0.494463	80.2633	110.134	7.5674	8.10128	88.4458	100.429	6.37805	4.87782	117.137	87.9607	-11.1595	-8.91236	78.1659	90.9322	-8.11767	3.82111	104.242	91.606	-13.0359	-7.36996	84.5345	91.6527	12.5009	-1.04966	79.8783	84.1003	7.38457	-10.9578	95.2757	114.621	0.826299	-0.491508	90.5158	92.626	8.58729	6.89405
-5.74619	-8.33997	84.5106	94.8879	2.79861	-0.000304547	101.396	94.6657	3.3043	6.00993	87.6632	69.3059	-3.75688	-3.33691	86.5574	115.227	4.49165	4.86063	89.6827	108.838	2.75444	1.09647	120.64	93.6461	-13.6335	-11.9158	83.2986	92.297	-11.5955	0.863791	110.607	104.166	-16.4089	-10.9143	90.4577	93.8685	8.2393	-3.49103	83.8431	91.2744	4.22195	-13.4141	100.067	119.888	-2.3028	-3.50741	94.4294	98.0059	8.42975	6.7845
-9.09628	-10.8954	81.4308	96.1287	0.273129	-2.87367	104.412	97.3305	0.762091	3.24369	92.0736	76.7071	-6.90185	-6.11289	92.4488	119.227	1.67745	2.06614	91.235	114.468	-0.68182	-2.41101	122.609	98.4686	-15.7919	-14.658	87.5186	92.8921	-14.9937	-2.05348	116.702	123.036	-19.4662	-14.1962	93.8685	95.3642	4.50981	-5.7313	87.4875	98.074	0.967095	-15.7105	104.106	124.372	-5.3402	-6.30296	97.6265	103.279	8.33678	6.69485
-12.7208	-13.2313	76.9031	95.6946	-1.92972	-5.5506	107.815	99.6765	-1.86956	0.626644	95.6575	85.6771	-9.75231	-8.8161	97.9966	122.114	-0.947099	-0.418832	93.0698	114.661	-3.85085	-5.69119	123.21	102.225	-17.7371	-17.2019	90.4998	92.91	-18.09	-4.97098	122.479	133.284	-22.4582	-17.2856	95.374	96.3755	1.45915	-7.90854	91.1796	104.081	-2.37147	-17.949	107.219	128.046	-8.20618	-8.94522	100.128	106.795	8.32522	6.63696
-15.2281	-15.4217	71.4341	93.3719	-3.95341	-8.10475	111.248	101.38	-4.39401	-1.86039	97.3733	95.6821	-12.3111	-11.4523	103.267	123.777	-3.38847	-2.73072	94.7602	116.807	-6.7334	-8.84418	122.688	104.84	-19.5407	-19.5871	92.1363	92.5722	-20.8201	-7.90739	127.981	136.005	-25.5373	-20.2598	95.4662	96.828	-1.02559	-10.1293	95.052	109.024	-5.66025	-20.2266	109.423	130.895	-10.7811	-11.5022	101.894	109.198	8.34994	6.60954
-19.6461	-17.485	65.7947	89.3104	-5.92324	-10.6074	114.334	102.159	-6.64688	-4.23702	96.3255	105.624	-14.5634	-14.0117	108.165	124.038	-5.62931	-4.94692	95.7972	120.087	-9.38047	-11.9897	121.168	106.425	-21.212	-21.8486	92.4512	92.2686	-23.2907	-10.8587	133.27	132.232	-28.7533	-23.163	94.0333	96.4539	-3.15356	-12.4366	99.0728	112.95	-8.62244	-22.5608	111.039	132.986	-13.3474	-14.0132	102.859	110.412	8.60685	6.60399
-22.5871	-19.4267	60.6707	84.0998	-7.88275	-13.1058	116.809	101.811	-8.53478	-6.51625	94.1634	114.779	-16.4909	-16.4605	112.398	122.719	-7.69482	-7.08634	95.8238	117.13	-11.8957	-15.2115	118.661	107.189	-22.7258	-24.0224	91.5744	92.6837	-25.6026	-13.8312	138.33	125.522	-32.0753	-26.0197	90.889	95.123	-5.09188	-14.8345	103.414	115.898	-10.9756	-24.9454	112.509	134.342	-15.5961	-16.4964	103.204	110.118	8.88466	6.62174
-20.6855	-21.2665	56.3165	78.6349	-9.80445	-15.611	118.467	100.242	-10.0703	-8.72443	91.619	122.241	-18.1095	-18.7558	115.759	119.726	-9.67038	-9.16331	94.668	114.671	-14.3698	-18.4939	115.203	107.346	-24.0871	-26.1166	89.8626	94.4696	-27.789	-16.8788	142.972	121.432	-35.4392	-28.8438	86.6545	93.0512	-6.96373	-17.3371	108.348	117.618	-12.6372	-27.3811	113.911	134.863	-17.2387	-18.9611	103.071	109.481	8.94997	6.66576
-22.4737	-23.0203	52.4301	73.7537	-11.6482	-18.0891	119.121	97.566	-11.383	-10.8925	87.3729	129.51	-19.4725	-20.8706	118.319	115.173	-11.6534	-11.2208	92.328	112.502	-16.814	-21.73	110.902	107.151	-25.3511	-28.1162	87.6586	97.1496	-29.8746	-20.0398	146.7	118.892	-38.756	-31.6244	82.5379	90.6402	-8.87168	-19.9578	113.779	117.693	-13.806	-29.8391	114.574	134.508	-19.1004	-21.4001	102.338	108.594	9.28144	6.72899
-26.1985	-24.6784	48.2448	69.8705	-13.4021	-20.4838	118.584	94.2276	-12.6383	-13.0262	81.9103	130.382	-20.658	-22.8117	120.274	109.496	-13.6782	-13.3035	88.9517	106.88	-19.1763	-24.7764	105.942	106.913	-26.5944	-30.0012	85.0603	98.6473	-31.8857	-23.2323	148.617	115.428	-41.8775	-34.3293	79.3833	88.2925	-10.8891	-22.6513	118.961	115.988	-14.8396	-32.2747	113.513	133.287	-21.0761	-23.779	100.858	106.31	9.68248	6.80243
-27.2178	-26.2122	42.7399	66.8565	-15.051	-22.745	116.682	90.8857	-13.9469	-15.1112	76.7456	150.917	-21.7546	-24.6171	121.716	103.485	-15.6784	-15.4166	84.8099	101.793	-21.3914	-27.4917	100.665	106.85	-27.8629	-31.7505	82.2783	96.0047	-33.7988	-26.2884	147.697	110.639	-44.6197	-36.9208	77.3337	86.3057	-13.0359	-25.3093	122.61	112.983	-16.0623	-34.6427	110.672	131.132	-22.7654	-26.046	98.5409	105.259	9.87501	6.87691
-29.2993	-27.5959	34.8804	64.1584	-16.5642	-24.8336	113.319	87.9644	-15.3415	-17.1286	72.5055	176.062	-22.8427	-26.3331	122.486	98.0526	-17.5371	-17.5274	80.2459	97.147	-23.4237	-29.7915	95.548	107.065	-29.1464	-33.3301	79.7923	85.4859	-35.5423	-29.0954	143.402	105.671	-46.8616	-39.357	76.0502	84.6724	-15.2791	-27.8217	123.595	109.531	-17.6677	-36.8738	107.001	127.984	-24.5005	-28.1535	95.3477	103.981	9.98772	6.93651
-32.0066	-28.8278	23.836	61	-17.9273	-26.7312	108.599	85.1905	-16.79	-19.068	69.1777	159.335	-23.9599	-27.9924	122.189	93.79	-19.1631	-19.5843	75.5866	92.1106	-25.2692	-31.7018	90.9738	108.069	-30.408	-34.7212	77.9101	61.492	-37.1076	-31.6468	135.927	101.144	-48.6344	-41.6025	74.9905	82.9886	-17.5503	-30.1382	121.988	106.394	-19.6937	-38.8689	103.249	123.852	-26.2282	-30.0803	91.3115	97.7606	10.0161	6.96567
-33.6005	-29.9296	9.19901	56.5333	-19.1637	-28.4532	102.859	81.425	-18.2235	-20.9244	66.1414	122.194	-25.0807	-29.5996	120.422	90.8095	-20.5417	-21.5409	71.0675	86.562	-26.9393	-33.3307	87.046	110.647	-31.6147	-35.9451	76.4256	20.0111	-38.5939	-33.9942	125.9	97.1893	-50.0828	-43.6365	73.6487	80.6267	-19.7562	-32.257	119.238	104.024	-22.0285	-40.5419	99.616	118.865	-27.7841	-31.8321	86.5058	88.0806	9.93153	6.95793
-34.4537	-30.9191	-8.71984	49.9191	-20.3188	-30.0355	96.5726	74.8952	-19.5797	-22.6966	61.1766	99.1953	-26.1401	-31.1185	117.053	88.728	-21.73	-23.3755	66.8091	82.6127	-28.4559	-34.7837	83.5508	114.577	-32.7365	-37.0389	74.4668	-33.6045	-40.0876	-36.192	114.316	93.544	-51.3382	-45.4476	71.5493	76.8503	-21.7959	-34.189	116.694	102.443	-24.4498	-41.8907	95.9623	113.287	-29.1896	-33.4261	80.8574	78.4043	9.81465	6.91762
-35.7004	-31.7843	-28.4548	40.4091	-21.4366	-31.5086	90.2382	63.7393	-20.8339	-24.3822	50.8625	114.197	-27.0728	-32.4884	112.326	86.804	-22.8049	-25.0956	62.8259	80.2223	-29.8465	-36.1244	80.009	118.359	-33.7547	-38.0129	70.3617	-77.889	-41.5761	-38.2633	102.674	89.9422	-52.4503	-47.0301	68.0202	70.7219	-23.6019	-35.9422	113.968	100.865	-26.7308	-42.9781	91.6532	107.427	-30.5281	-34.8736	74.044	72.2542	9.75131	6.85384
-36.7014	-32.4901	-47.3143	27.4739	-22.5339	-32.8776	84.3071	46.7001	-21.9947	-25.9825	20.006	137.435	-27.84	-33.6796	106.746	84.4717	-23.8012	-26.7199	59.014	76.6969	-31.1317	-37.3815	75.7439	120.336	-34.6639	-38.8465	61.6247	-97.2212	-42.9896	-40.181	92.3856	86.1972	-53.434	-48.3995	62.1141	60.6547	-25.1735	-37.5167	109.295	97.5548	-28.7275	-43.8771	85.5559	101.649	-31.7265	-36.1775	64.498	67.4499	9.69984	6.77617
-37.9063	-33.0144	-62.528	11.0343	-23.5835	-34.1151	78.9766	23.521	-23.0833	-27.4968	-37.5259	136.839	-28.4365	-34.7086	100.881	81.4003	-24.71	-28.2646	55.0937	73.8738	-32.316	-38.5543	69.8915	118.815	-35.4827	-39.5192	45.2162	-97.84	-44.2341	-41.8804	83.9736	82.0982	-54.3009	-49.5878	52.2242	43.7902	-26.5658	-38.8952	101.757	88.7154	-30.4281	-44.6472	76.433	96.3394	-32.8225	-37.3349	51.3085	59.8715	9.66885	6.69288
-39.9701	-33.3656	-72.6304	-8.11194	-24.5398	-35.178	73.9342	-8.20361	-24.1101	-28.9063	-82.2876	133.312	-28.8765	-35.587	95.1544	77.0871	-25.4989	-29.7228	50.54	69.2364	-33.4057	-39.6103	61.3258	110.757	-36.243	-40.0423	16.814	-79.876	-45.1932	-43.3253	77.0891	77.3361	-55.0257	-50.5893	35.3058	13.1102	-27.8286	-40.0354	93.1118	69.2451	-31.9286	-45.3055	63.2986	91.6438	-33.8746	-38.3334	37.4232	49.5942	9.6769	6.60588
-40.1569	-33.5828	-77.4347	-27.989	-25.3757	-36.0357	68.3535	-47.9044	-25.0595	-30.1702	-92.4995	127.284	-29.1773	-36.2934	89.8357	70.822	-26.1229	-31.0704	44.5248	63.6657	-34.4159	-40.4955	48.6399	87.9927	-36.9758	-40.452	-24.9557	-47.2392	-45.8045	-44.5647	70.9706	71.4972	-55.5185	-51.3221	2.64397	-30.1685	-28.9699	-40.9029	86.2163	16.3272	-33.3118	-45.8034	45.2775	87.2901	-34.6262	-39.1539	23.7793	33.7798	9.54153	6.50457
-38.2403	-33.7249	-77.2181	-45.9736	-26.0575	-36.689	61.0839	-80.8925	-25.904	-31.2394	-86.2691	120.343	-29.3572	-36.7919	85.3489	61.6333	-26.5537	-32.2782	35.8484	56.7763	-35.3555	-41.159	30.5718	36.3655	-37.6771	-40.7763	-65.6363	-20.191	-46.1122	-45.6676	64.8366	64.0528	-55.6565	-51.7192	-43.5385	-64.558	-29.9691	-41.5217	81.4249	-59.9572	-34.5488	-46.0916	20.2951	82.643	-35.0393	-39.7871	9.70432	13.6583	9.27011	6.38231
-38.3761	-33.8589	-72.3239	-59.9858	-26.4924	-37.1813	50.859	-96.768	-26.6385	-32.0742	-66.8476	110.998	-29.4426	-37.052	82.0407	48.2312	-26.7949	-33.3106	22.9016	44.5149	-36.2092	-41.5606	7.43481	-29.7852	-38.3103	-41.0341	-88.3352	-6.55521	-46.2085	-46.6365	58.1619	54.354	-55.3311	-51.8338	-76.7975	-79.4492	-30.8297	-41.968	75.3972	-94.8119	-35.5652	-46.1661	-12.9735	76.8234	-35.4726	-40.2433	-1.86205	-2.94849	9.04741	6.25095
-38.8975	-34.0555	-63.3737	-69.1062	-26.5715	-37.5996	36.4378	-101.297	-27.2837	-32.6643	-44.8036	101.934	-29.4896	-37.0801	79.9424	29.3884	-26.8711	-34.15	4.11527	28.671	-36.9392	-41.701	-17.3646	-67.511	-38.85	-41.2375	-97.0568	0.929166	-46.205	-47.438	50.657	41.6985	-54.5347	-51.796	-89.6765	-81.5073	-31.5832	-42.3324	62.1512	-102.384	-36.3622	-46.0303	-46.6101	68.7954	-35.7807	-40.5532	-11.4165	-13.6717	8.80217	6.12366
-37.6978	-34.3906	-51.7581	-73.1604	-26.2879	-38.0471	16.4957	-97.8325	-27.8836	-33.0602	-29.4781	94.8318	-29.5824	-36.9334	78.9699	5.19564	-26.8242	-34.8249	-19.6421	10.2657	-37.5081	-41.6437	-38.7319	-76.1914	-39.3261	-41.4008	-96.6333	5.5786	-46.2308	-48.0935	41.9052	25.6062	-53.4381	-51.7071	-90.7405	-72.9593	-32.2621	-42.6859	32.9106	-95.1477	-37.0142	-45.6756	-69.0609	57.4506	-35.8232	-40.7694	-20.524	-19.6693	8.51596	5.99805
-38.1177	-34.9252	-39.6063	-72.105	-25.7693	-38.5737	-9.63085	-87.3314	-28.4903	-33.3605	-19.9997	90.133	-29.7783	-36.702	78.6332	-21.0871	-26.7457	-35.4048	-42.9014	-2.3623	-37.892	-41.4839	-53.5349	-65.7354	-39.7982	-41.5475	-88.8537	9.1891	-46.3345	-48.6653	31.2566	6.61812	-52.3007	-51.5811	-81.8338	-56.571	-32.921	-43.0658	-19.1202	-75.9931	-37.5981	-45.082	-80.7481	41.8392	-35.9769	-40.9447	-29.6672	-21.2187	8.32135	5.8573
-40.6204	-35.6913	-28.802	-65.9222	-25.1477	-39.1126	-38.0685	-70.8268	-29.1418	-33.6538	-13.0841	86.9101	-30.0568	-36.4699	78.1239	-43.6806	-26.7503	-35.9651	-60.0775	-11.7015	-38.1017	-41.3143	-61.5271	-45.1158	-40.2887	-41.7136	-75.0741	12.7932	-46.476	-49.2125	18.3904	-12.8308	-51.3026	-51.3468	-65.0198	-38.6827	-33.6429	-43.4972	-74.8415	-53.8025	-38.1464	-44.2278	-85.161	21.9009	-36.3341	-41.1095	-36.831	-20.0872	8.26256	5.68519
-35.8465	-36.6773	-20.1418	-55.1277	-24.4985	-39.518	-60.4046	-51.9277	-29.8574	-34.0022	-6.86403	83.5939	-30.3834	-36.2969	76.2828	-58.7637	-26.9044	-36.5656	-70.3472	-22.6083	-38.1876	-41.214	-63.7805	-27.8549	-40.7808	-41.9485	-58.4795	17.0803	-46.6737	-49.7969	3.86391	-29.2191	-50.4931	-50.9216	-46.1861	-24.7925	-34.5092	-44.014	-102.113	-37.9149	-38.6311	-43.154	-83.9601	-0.45722	-36.0696	-41.2826	-39.2846	-18.9084	8.03135	5.48862
-34.9304	-37.8078	-13.535	-41.4747	-23.9422	-39.706	-73.1025	-35.2804	-30.6693	-34.4829	-0.805006	78.3307	-30.7908	-36.2293	71.252	-66.1084	-27.2304	-37.2698	-75.0403	-31.5803	-38.2352	-41.2369	-61.6399	-18.6291	-41.2925	-42.3204	-43.4107	22.5466	-47.0364	-50.4564	-10.9074	-40.1999	-49.837	-50.2977	-31.3671	-15.2802	-35.5635	-44.6374	-109.011	-28.1162	-39.0242	-42.0093	-77.8518	-21.5713	-36.232	-41.4958	-38.6744	-17.9421	7.96247	5.29365
-38.5503	-38.9411	-8.48952	-27.6767	-23.6672	-39.724	-77.7813	-22.5957	-31.6359	-35.2088	5.34083	68.7085	-31.3591	-36.3181	60.2931	-66.8441	-27.7598	-38.1389	-75.3434	-35.0622	-38.3435	-41.375	-56.5045	-14.7015	-41.8786	-42.9145	-32.0524	29.6705	-47.6615	-51.1502	-24.137	-45.2734	-49.2348	-49.5494	-21.2882	-8.60984	-36.7787	-45.337	-99.5222	-21.3415	-39.3358	-40.9556	-67.562	-38.3257	-36.9278	-41.783	-36.0952	-16.5502	7.87753	5.11375
-39.2637	-39.9311	-4.23416	-15.7621	-23.8459	-39.6673	-76.2137	-13.0789	-32.8299	-36.2677	12.6784	51.4498	-32.1275	-36.6149	40.2283	-62.1934	-28.5608	-39.2184	-72.0311	-31.295	-38.5881	-41.5583	-49.7133	-13.4995	-42.5484	-43.798	-24.2275	38.7906	-48.5691	-51.7782	-34.3253	-44.9583	-48.5524	-48.7891	-14.3423	-3.45952	-38.073	-46.0555	-72.2958	-15.6068	-39.6189	-40.0538	-54.6539	-49.7505	-37.5071	-42.1575	-31.7391	-14.4876	7.72202	4.94382
-37.476	-40.7797	0.343488	-6.19998	-24.5707	-39.604	-69.5834	-5.42935	-34.3013	-37.6651	22.9732	24.2025	-33.082	-37.1592	10.1835	-53.3888	-29.713	-40.5522	-65.8174	-31.4611	-38.9875	-41.7205	-42.3147	-13.315	-43.2383	-45.0104	-19.0142	49.6903	-49.7459	-52.2492	-40.6124	-40.2526	-47.7686	-48.156	-9.12321	1.00331	-39.3565	-46.7631	-40.7081	-10.0869	-39.9403	-39.3158	-41.4787	-56.3132	-38.0164	-42.6341	-26.832	-12.8683	7.44695	4.78646
-40.6399	-41.6804	6.4338	1.45325	-25.8289	-39.572	-59.1539	1.47456	-36.0694	-39.3548	36.7707	-9.05732	-34.2216	-37.9642	-23.5216	-41.9382	-31.2715	-42.1903	-57.6602	-32.5973	-39.5541	-41.858	-34.9676	-13.1035	-43.888	-46.5786	-15.3541	61.2977	-51.3118	-52.5362	-42.7438	-32.5033	-47.0616	-47.8047	-4.77217	5.28502	-40.5757	-47.4908	-22.5075	-4.41636	-40.3511	-38.7658	-29.9548	-58.8479	-39.1612	-43.2542	-22.4938	-11.1776	7.15618	4.67243
-44.3148	-42.8905	14.6321	7.81887	-27.5484	-39.5699	-46.7791	8.48092	-38.175	-41.3343	51.6878	-37.3081	-35.5669	-39.0058	-50.4123	-29.6729	-33.2573	-44.2043	-48.6974	-32.4088	-40.3941	-42.0683	-27.9752	-11.9485	-44.4781	-48.5083	-12.0854	72.2292	-53.5097	-52.676	-40.8989	-23.2793	-46.6823	-47.8523	-0.810735	9.79735	-41.7612	-48.3112	-12.8784	1.97453	-40.8507	-38.4294	-20.7193	-58.1988	-40.5944	-44.0773	-17.7215	-8.41049	6.99585	4.65477
-43.778	-44.6248	24.5055	13.4206	-29.6357	-39.5678	-34.3534	16.1909	-40.6995	-43.6491	64.2764	-53.4902	-37.0956	-40.2079	-66.2442	-18.1788	-35.6895	-46.672	-39.9317	-31.8685	-41.7073	-42.5845	-21.3524	-8.38524	-45.0242	-50.7171	-7.8902	82.2899	-56.3722	-52.7941	-35.6219	-13.9383	-46.8582	-48.3892	3.09626	14.9865	-43.04	-49.3173	-5.61441	10.1379	-41.4277	-38.3441	-13.4536	-55.2062	-41.9389	-45.1698	-12.0531	-4.00377	6.79975	4.8022
-45.7094	-47.0501	34.7212	18.6709	-31.9842	-39.5951	-22.9607	24.9361	-43.7751	-46.3282	74.1343	-57.9742	-38.7732	-41.4569	-72.3342	-8.22825	-38.6168	-49.6296	-31.9716	-27.5249	-43.7138	-43.7763	-14.9639	-0.576968	-45.6275	-53.0782	-1.41692	92.507	-59.5979	-53.1458	-27.8314	-5.2248	-47.8139	-49.5322	7.31088	21.3365	-44.6048	-50.6025	2.97892	21.5064	-42.1353	-38.5904	-7.33329	-50.6781	-43.8502	-46.6169	-5.42426	2.6136	6.83972	5.16268
-48.816	-50.2667	43.7199	23.9125	-34.5012	-39.8	-12.8789	34.644	-47.5727	-49.3953	84.1301	-53.5561	-40.6107	-42.6722	-70.8462	0.134244	-42.1193	-53.0656	-25.0205	-22.5281	-46.6433	-46.0778	-8.70094	13.6672	-46.495	-55.6594	8.36616	102.52	-62.8707	-54.0173	-18.6882	2.67205	-49.8301	-51.4321	12.2796	29.2037	-46.672	-52.2606	14.9689	37.1476	-43.0692	-39.3032	-1.23873	-45.3227	-46.2909	-48.5409	2.37193	11.1358	7.03412	5.73837
-53.2009	-54.2803	50.6994	29.4257	-37.1512	-40.4103	-3.96429	44.6992	-52.2664	-52.9132	95.9736	-44.3017	-42.6899	-43.9017	-63.6757	7.15521	-46.2772	-56.9302	-19.0428	-17.2237	-50.7704	-49.8553	-2.57545	38.1603	-47.8649	-58.7838	21.9236	109.68	-66.0059	-55.5735	-9.30426	9.83482	-53.2725	-54.2333	18.5137	38.4217	-49.4715	-54.4127	31.1252	56.246	-44.355	-40.6743	5.88336	-39.7083	-49.3932	-51.0881	11.4142	21.1263	7.40214	6.50818
-57.7324	-58.978	56.1666	35.3854	-40.001	-41.6611	4.09848	54.0352	-57.949	-56.9629	106.768	-34.7625	-45.1812	-45.3479	-52.9235	13.1082	-51.1353	-61.1409	-13.8713	-11.238	-56.3286	-55.2492	3.30597	72.3257	-49.9688	-62.8391	38.889	111.389	-68.7549	-57.8475	-0.478993	16.4358	-58.4268	-58.0131	26.4749	47.8981	-53.2163	-57.2299	49.8847	75.3693	-46.2291	-42.9466	14.5783	-34.2211	-53.1749	-54.3833	21.172	31.4296	7.89913	7.43809
-63.7719	-64.1638	61.7194	41.7868	-43.2274	-43.737	11.6695	61.5826	-64.5483	-61.6096	112.003	-27.4556	-48.3571	-47.3446	-41.0312	18.286	-56.7068	-65.6071	-9.11633	-1.43297	-63.2391	-62.0662	8.91694	101.109	-53.0547	-68.0576	57.6868	106.808	-70.7735	-60.7559	7.45619	22.6919	-65.2444	-62.7062	36.3511	55.9127	-58.0509	-60.9146	66.6937	91.299	-49.0458	-46.354	24.7451	-29.018	-57.82	-58.4833	30.6449	40.1426	8.5817	8.45487
-67.6188	-69.6402	69.0591	48.3936	-47.049	-46.7965	19.1507	66.858	-71.7693	-66.8974	108.84	-22.4531	-52.5483	-50.296	-29.956	23.0236	-62.9085	-70.2612	-3.85142	7.44066	-70.8863	-69.7731	14.5915	117.107	-57.3279	-74.3224	75.9289	97.5467	-71.8162	-64.1587	14.5833	28.8143	-73.1959	-68.0376	47.8006	61.3114	-63.9725	-65.5922	77.9899	102.99	-53.1487	-51.0265	35.8013	-24.0866	-62.931	-63.3456	39.0853	46.086	9.14279	9.41018
-71.9119	-75.1984	78.4824	54.8331	-51.6304	-51.0014	27.1018	70.3211	-79.1152	-72.757	96.3963	-18.9265	-58.0166	-54.5605	-20.552	27.6329	-69.4431	-75.1096	3.53337	17.3533	-78.3102	-77.6169	21.1408	122.45	-62.8403	-81.1257	91.7339	87.1943	-71.9131	-67.9809	21.1878	34.9182	-81.246	-73.5678	60.0062	64.567	-70.7208	-71.1665	83.5094	109.959	-58.7001	-56.8947	46.9314	-19.3792	-68.5316	-68.8163	46.3156	50.084	9.60749	10.0815
-81.1738	-80.5705	88.2247	60.9098	-57.0591	-56.4374	36.2843	73.4616	-86.0136	-78.9393	79.4579	-16.2852	-64.7465	-60.2912	-12.8807	32.3353	-75.8333	-80.1826	14.7134	125.889	-84.7571	-84.8556	29.3993	119.309	-69.3749	-87.7594	104.146	78.3519	-71.4106	-72.1961	27.5806	41.0645	-88.1914	-78.8545	72.2986	68.0439	-77.7315	-77.2616	84.8003	111.394	-65.4816	-63.6218	57.3633	-14.9376	-74.7067	-74.6336	52.8535	61.776	9.98984	10.2473
-88.9975	-85.4641	95.6495	66.907	-63.4167	-63.0246	47.3438	78.3858	-91.9718	-85.0619	67.2611	-14.344	-72.2758	-67.2784	-6.63256	37.2401	-81.6545	-85.361	30.4139	177.109	-89.9481	-90.9639	39.7208	110.518	-76.3833	-93.5766	112.481	71.5784	-70.8651	-76.6629	33.9829	47.375	-93.3176	-83.6003	84.6014	75.0476	-84.254	-83.3253	84.6963	107.01	-72.7897	-70.6142	66.7684	-10.8885	-80.534	-80.4485	59.6624	67.8125	10.0074	9.79688
-91.919	-89.6461	98.8321	73.5221	-70.7649	-70.466	60.1026	86.5267	-96.7279	-90.7227	62.4234	-12.9351	-79.8457	-74.9583	-1.29947	42.3649	-86.6897	-90.3108	49.7514	188.642	-93.9381	-95.708	51.9493	102.163	-83.1803	-98.2141	115.87	66.8835	-70.8176	-81.0661	40.481	54.0559	-96.6236	-87.6895	96.8131	86.958	-89.6421	-88.8108	87.4483	98.8301	-79.6577	-77.245	75.5463	-7.25823	-85.437	-85.8943	67.0835	70.8867	9.407	8.78896
-91.8623	-92.9733	97.1354	81.3597	-78.7783	-78.2035	73.1011	97.215	-100.247	-95.5739	61.118	-11.4769	-86.7716	-82.5987	3.70045	47.6446	-90.8837	-94.6733	70.0752	194.602	-96.9324	-99.1131	65.5711	99.5364	-89.2284	-101.632	113.428	64.3927	-71.759	-85.0648	47.1014	61.2985	-98.5144	-91.1077	107.91	101.15	-93.5938	-93.3428	95.7547	91.4268	-85.369	-83.1665	84.5045	-3.75631	-89.4491	-90.6773	74.4909	74.8538	8.54697	7.43273
-94.5277	-95.3992	91.3423	90.3404	-86.4129	-85.4764	84.3779	107.951	-102.609	-99.3669	59.411	-8.79261	-92.641	-89.5298	8.89563	52.9313	-94.2458	-98.2588	88.3367	198.92	-99.1681	-101.359	79.9618	102.384	-94.2372	-104.002	105.137	63.8077	-74.1837	-88.424	53.8988	69.1188	-99.4042	-93.8522	116.24	113.466	-96.1733	-96.7794	106.304	88.2204	-89.771	-88.322	94.0416	0.238064	-93.034	-94.6154	80.7225	79.8715	7.71277	6.0219
-97.2281	-96.9657	83.8069	99.5079	-92.5527	-91.5949	92.8075	116.36	-103.967	-102.025	56.3025	-3.1908	-97.2997	-95.319	14.7127	58.1216	-96.7915	-101.038	102.985	203.298	-100.844	-102.691	94.4622	106.865	-98.1454	-105.566	93.6706	64.2144	-77.9171	-91.0808	60.9572	77.283	-99.5583	-95.9343	120.356	121.42	-97.6584	-99.1767	112.962	89.1919	-93.1423	-92.7344	103.587	5.40878	-95.9186	-97.6479	85.1464	85.3163	6.7657	4.83591
-95.4708	-97.7626	77.376	107.407	-96.8774	-96.2213	98.4779	121.446	-104.545	-103.659	52.6803	7.12702	-100.755	-99.827	21.4674	63.3741	-98.5287	-103.046	113.95	201.778	-102.138	-103.394	108.106	109.983	-101.053	-106.535	83.4783	64.6373	-81.7777	-93.1326	68.3437	85.4149	-99.1503	-97.3885	118.869	124.195	-98.3419	-100.698	112.358	92.2842	-95.861	-96.4156	111.805	12.1118	-97.6817	-99.8254	87.9011	89.9781	5.94032	4.03961
-94.4595	-97.8532	73.4855	112.726	-99.7468	-99.4022	102.329	123.386	-104.59	-104.53	49.3836	23.0184	-103.083	-103.151	29.2695	69.248	-99.4723	-104.313	121.636	192.846	-103.228	-103.774	119.628	111.084	-103.119	-107.023	76.7206	64.5623	-84.6012	-94.746	76.0674	93.2615	-98.3602	-98.2686	109.576	121.262	-98.4061	-101.545	104.272	95.5687	-98.15	-99.3858	117.415	20.1691	-98.8378	-101.272	89.0711	93.3757	5.59175	3.64893
-95.2708	-97.2521	71.8258	114.678	-101.639	-101.409	105.869	122.97	-104.282	-104.972	46.5528	42.8312	-104.423	-105.527	37.7391	76.7008	-99.6036	-104.863	126.336	144.469	-104.226	-104.093	127.904	110.582	-104.468	-107.089	72.888	63.9915	-85.9339	-96.0272	84.0903	100.978	-97.3547	-98.6513	90.4378	111.797	-97.9529	-101.889	91.6577	98.3417	-100.06	-101.673	119.813	29.1661	-99.5648	-102.132	88.6467	92.4096	5.54872	3.59808
-96.9399	-95.9933	71.3991	113.019	-102.914	-102.579	110.85	121.365	-103.681	-105.26	43.7491	63.8877	-105.024	-107.248	45.9137	86.6359	-98.857	-104.763	128.027	148.952	-105.129	-104.51	132.281	109.163	-105.161	-106.819	70.9411	63.1713	-85.8251	-96.9393	92.3883	109.182	-96.2042	-98.5848	67.9005	96.7607	-97.0659	-101.811	80.1506	100.826	-101.601	-103.283	119.388	39.0261	-99.8548	-102.526	87.5444	95.6353	5.80671	3.84255
-97.718	-94.1966	71.3872	108.172	-103.838	-103.23	118.21	119.886	-102.793	-105.5	40.2146	85.4672	-105.203	-108.604	52.8535	98.8557	-97.247	-104.142	126.349	223.143	-105.848	-105.048	132.428	107.7	-105.253	-106.371	70.1952	62.1317	-84.615	-97.3593	100.921	118.474	-94.9145	-98.0359	52.1521	81.9064	-95.8404	-101.324	73.3012	103.253	-102.816	-104.202	117.884	50.2329	-99.6441	-102.547	86.8996	105.384	6.40761	4.36478
-96.2718	-92.0657	71.3342	101.703	-104.601	-103.602	127.082	119.416	-101.714	-105.653	35.2603	105.895	-105.217	-109.841	58.6328	111.659	-94.9993	-103.164	120.794	249.742	-106.275	-105.584	128.34	106.641	-104.863	-105.944	70.2092	60.0773	-82.8566	-97.204	109.415	128.535	-93.5359	-96.9393	44.9569	72.7168	-94.3816	-100.457	71.0072	105.284	-103.76	-104.475	117.577	63.4112	-98.9523	-102.266	86.7827	111.371	7.22887	5.12039
-91.8749	-89.8421	70.9431	96.0053	-105.296	-103.83	135.555	119.944	-100.664	-105.641	28.7593	121.197	-105.198	-111.131	67.0329	123.083	-92.4823	-102.005	111.517	260.843	-106.355	-105.931	121.745	105.896	-104.196	-105.719	70.4994	55.1915	-81.1228	-96.5193	117.264	138.061	-92.166	-95.3144	43.2757	69.5133	-92.7905	-99.3005	72.0878	106.154	-104.489	-104.234	119.462	78.3865	-97.8759	-101.77	87.1037	115.843	8.22347	6.02924
-89.5585	-87.7319	69.8986	92.7686	-105.915	-103.966	142.204	120.812	-99.8499	-105.439	21.1072	129.452	-105.194	-112.551	85.9477	132.199	-90.0191	-100.841	100.574	160.868	-106.127	-105.946	116.945	105.375	-103.483	-105.769	70.5135	46.0865	-79.8365	-95.4943	123.83	145.958	-90.8596	-93.3022	44.6891	69.9804	-91.137	-98.0021	74.8943	105.272	-105.074	-103.677	123.136	93.51	-97.0049	-101.156	88.5217	109.298	9.03347	7.00467
-90.0724	-85.8514	67.8752	92.1632	-106.401	-104.023	146.435	121.386	-99.348	-105.106	12.7425	131.799	-105.268	-114.097	111.934	139.076	-87.8012	-99.8184	91.0584	105.982	-105.688	-105.595	117.219	105.072	-102.906	-106.037	69.7785	33.8689	-79.1839	-94.3833	128.799	151.993	-89.5997	-91.1289	47.12	72.0124	-89.4553	-96.7462	76.3405	102.409	-105.59	-103.033	127.849	106.544	-96.483	-100.529	90.6501	105.664	9.51403	7.97427
-88.3988	-84.2202	64.6668	93.4093	-106.736	-104.017	147.871	121.406	-99.1114	-104.756	4.08656	130.548	-105.496	-115.709	132.979	143.355	-85.9196	-99.0352	84.4971	133.688	-105.137	-104.919	122.107	104.868	-102.546	-106.385	67.86	20.8879	-79.0825	-93.4105	132.152	156.46	-88.3272	-89.0737	48.7161	74.2238	-87.7714	-95.7126	72.8446	97.3526	-106.095	-102.511	132.799	116.24	-95.8747	-99.9772	91.8708	108.403	10.0766	8.87639
-87.3165	-82.7958	60.2915	95.4877	-106.959	-103.98	145.909	120.804	-99.0421	-104.462	-4.30062	128.987	-105.882	-117.268	145.843	144.332	-84.4322	-98.5161	80.3642	137.809	-104.568	-104.015	129.115	104.584	-102.392	-106.676	64.3895	8.40151	-79.2521	-92.7286	133.889	159.188	-86.9761	-87.419	48.3821	75.8544	-86.1643	-94.9918	63.6766	89.5515	-106.602	-102.244	137.025	122.626	-95.4169	-99.5543	91.3258	107.966	10.5727	9.65354
-88.7019	-81.5101	54.8786	97.4897	-107.13	-103.944	140.191	119.388	-99.0117	-104.218	-12.0361	130.182	-106.288	-118.614	153.267	141.899	-83.4232	-98.1947	77.5211	133.604	-104.063	-103.031	135.809	104.144	-102.361	-106.817	59.2831	-3.13809	-79.3581	-92.402	133.795	158.543	-85.5065	-86.3677	45.9719	76.4917	-84.7932	-94.5392	51.8854	78.1815	-107.082	-102.263	139.714	126.316	-95.2472	-99.2637	89.1164	105.736	10.8855	10.2625
-88.8377	-80.2937	48.433	98.7673	-107.304	-103.903	132.184	116.774	-98.8753	-103.967	-18.9958	134.294	-106.512	-119.618	156.18	135.822	-82.9775	-97.9477	75.1182	108.311	-103.654	-102.115	140.689	103.571	-102.323	-106.743	52.7853	-13.3161	-79.1215	-92.3763	131.432	143.456	-83.9188	-85.9345	41.8496	75.8852	-83.7951	-94.2218	40.0713	62.9787	-107.499	-102.492	140.652	128.167	-94.9835	-99.0556	85.4908	99.5191	11.2546	10.6962
-88.3799	-79.0779	40.8005	98.9526	-107.469	-103.808	124.832	112.649	-98.5115	-103.627	-25.0543	138.942	-106.413	-120.225	153.192	126.353	-83.0955	-97.6498	72.6582	89.1973	-103.292	-101.338	143.24	102.806	-102.131	-106.396	45.3164	-21.8566	-78.4058	-92.4943	126.717	120.727	-82.2521	-85.9007	36.4571	73.8544	-83.1482	-93.9089	27.6115	45.5983	-107.839	-102.781	140.22	129.311	-94.6306	-98.837	80.5445	92.4121	11.5969	10.9897
-88.5833	-77.8088	31.9035	97.885	-107.511	-103.586	119.461	107.152	-97.8583	-103.095	-30.1021	142.078	-105.957	-120.427	136.417	115.686	-83.6558	-97.2241	69.853	86.53	-102.866	-100.665	143.43	101.592	-101.673	-105.733	37.353	-28.598	-77.2685	-92.5688	121.01	122.752	-80.5796	-85.9276	30.1332	70.2097	-82.6881	-93.5165	12.6208	29.0663	-108.09	-102.955	138.931	130.688	-94.2482	-98.5006	73.7283	88.6401	11.8324	11.1913
-86.5779	-76.4813	22.1054	95.5228	-107.33	-103.165	114.892	100.949	-96.9089	-102.235	-34.0222	143.42	-105.17	-120.217	106.731	106.438	-84.4723	-96.6276	66.5814	91.0574	-102.26	-99.9914	141.474	99.5184	-100.897	-104.726	29.3479	-33.3662	-75.9095	-92.4427	116.827	141.235	-78.9943	-85.7638	23.2601	64.7992	-82.2487	-93.0054	-4.4261	15.1909	-108.196	-102.883	136.784	132.293	-93.5422	-97.958	65.4141	87.0051	12.0927	11.3213
-85.1805	-75.1451	12.4169	91.9189	-106.963	-102.487	109.461	94.827	-95.704	-100.949	-36.5834	143.91	-104.086	-119.581	84.9088	99.4344	-85.3432	-95.8152	62.8518	102.754	-101.4	-99.2071	137.899	96.1118	-99.8241	-103.352	21.742	-36.1416	-74.5773	-91.9786	115.619	144.308	-77.5693	-85.3203	16.693	57.697	-81.7685	-92.3585	-19.5619	3.88551	-108.023	-102.553	133.293	133.2	-92.7671	-97.1589	58.0672	84.7186	12.2098	11.3737
-85.2865	-73.8692	4.16747	87.2077	-106.484	-101.516	102.523	89.2474	-94.3278	-99.2758	-37.4302	144.562	-102.755	-118.517	78.4661	94.0043	-86.0703	-94.7649	58.7456	112.627	-100.274	-98.2571	133.332	91.0049	-98.535	-101.612	14.9851	-37.2285	-73.4916	-91.0315	116.678	136.424	-76.2899	-84.6075	11.4013	49.4082	-81.2838	-91.5581	-29.6076	-5.46029	-107.411	-102.055	128.322	132.414	-92.019	-96.0968	52.8711	81.2919	12.0995	11.3439
-84.5474	-72.7209	-1.75726	81.5495	-105.79	-100.249	94.6985	84.203	-92.9217	-97.3954	-36.5713	145.678	-101.295	-117.05	76.9191	89.3245	-86.4759	-93.5239	54.4071	117.977	-98.9384	-97.1616	128.022	84.0118	-97.1742	-99.5692	9.34334	-37.103	-72.7782	-89.5006	118.121	126.678	-75.0609	-83.6581	7.53663	41.0711	-80.8678	-90.5909	-34.6376	-13.0709	-106.253	-101.439	122.325	129.621	-91.1003	-94.8053	48.946	77.2672	11.8869	11.2381
-82.3191	-71.7555	-5.39096	75.124	-104.691	-98.7318	87.1382	79.3279	-91.7042	-95.4811	-34.8232	146.639	-99.8837	-115.254	76.0679	84.8993	-86.4095	-92.1958	49.9768	120.553	-97.5277	-95.9888	121.754	74.9605	-95.9154	-97.3914	4.85565	-36.2195	-72.4047	-87.419	118.207	115.092	-73.8325	-82.4933	4.65305	34.2471	-80.5957	-89.4708	-35.8414	-18.879	-104.548	-100.643	115.863	125.352	-89.9846	-93.3477	45.6782	72.8268	11.6233	11.0703
-77.2313	-71.0004	-7.47538	68.1506	-103.223	-97.0481	80.6329	74.1363	-90.9055	-93.6202	-33.1141	146.356	-98.7097	-113.255	74.5737	80.531	-85.7655	-90.9147	45.4625	118.935	-96.2386	-94.8068	114.431	63.7497	-94.9013	-95.3058	1.57363	-35.116	-72.1428	-85.0097	115.913	105.363	-72.6808	-81.136	2.43799	29.9007	-80.5779	-88.251	-35.2266	-23.2804	-102.44	-99.6036	109.392	120.511	-88.6197	-91.8138	42.6001	68.1125	11.5622	10.8593
-78.7479	-70.4343	-8.95533	60.8497	-101.699	-95.3016	75.3697	68.242	-90.635	-91.8738	-31.9103	144.073	-97.9065	-111.197	72.5309	76.1585	-84.5485	-89.8232	40.7233	114.031	-95.2136	-93.662	106.696	50.748	-94.2263	-93.5187	-0.543737	-34.4061	-71.6707	-82.6033	107.381	97.9171	-71.7733	-79.6234	0.7225	27.6632	-80.9675	-87.0008	-34.9865	-26.9789	-100.193	-98.3717	103.237	115.81	-87.9619	-90.31	39.1149	63.1007	10.9959	10.63
-82.0304	-69.9713	-10.5808	53.4323	-100.425	-93.6018	71.036	61.447	-90.8442	-90.3566	-31.3906	139.876	-97.5048	-109.202	70.0394	71.8361	-82.9362	-89.0474	35.5734	108.42	-94.4166	-92.5797	99.5962	36.9974	-93.9519	-92.1603	-1.94462	-34.2846	-70.8021	-80.4267	93.2654	92.3224	-71.2777	-77.9818	-0.641713	26.4306	-81.8751	-85.7821	-35.8603	-30.141	-98.0766	-97.0516	97.551	111.6	-87.6491	-88.9237	35.1494	57.9942	10.5061	10.4213
-82.1599	-69.4757	-12.632	46.1191	-99.5228	-92.0135	66.9896	53.7327	-91.3478	-89.1832	-31.6026	134.297	-97.4383	-107.373	67.0196	67.5005	-81.2454	-88.6589	29.8959	103.384	-93.6167	-91.5724	93.6787	24.1342	-94.0413	-91.2223	-3.33404	-34.3746	-69.5513	-78.4746	83.3031	87.8809	-71.2845	-76.1959	-1.70741	25.2932	-83.2846	-84.6574	-37.4061	-32.4523	-96.3411	-95.6255	92.3914	107.75	-87.2576	-87.6775	31.5087	53.0241	10.4228	10.2849
-84.9181	-68.7842	-14.9233	39.0562	-98.979	-90.4897	62.4961	45.2259	-91.8652	-88.3358	-32.3738	127.417	-97.5696	-105.762	63.4516	62.6089	-79.8136	-88.632	23.7607	98.0787	-92.4811	-90.6511	88.794	13.7916	-94.302	-90.5073	-5.28152	-34.2944	-68.0422	-76.5775	76.8246	84.0622	-71.7406	-74.2112	-2.4769	23.7532	-85.0258	-83.6667	-39.0327	-33.722	-95.2267	-93.9439	87.7901	103.821	-87.2694	-86.5056	28.0935	48.1634	10.3983	10.2708
-81.0506	-67.7024	-17.2071	32.2005	-98.7487	-88.7778	56.9431	36.1765	-92.1035	-87.615	-33.3341	118.933	-97.7111	-104.29	59.3632	56.9759	-78.8785	-88.8302	17.4772	93.2042	-90.7055	-89.8507	84.5139	6.64625	-94.5312	-89.6587	-7.94521	-33.989	-66.372	-74.5292	70.6227	80.8002	-72.4213	-71.9881	-3.10257	21.6076	-86.7298	-82.7506	-40.4565	-34.1231	-94.8623	-91.856	83.7448	99.6428	-86.7377	-85.259	24.6018	43.4613	10.7228	10.4049
-78.5857	-65.9973	-19.476	25.341	-98.7149	-86.4304	49.9915	26.9429	-91.7993	-86.6559	-34.2371	109.212	-97.6503	-102.711	54.6367	50.8613	-78.4803	-89.0365	11.4983	87.5281	-88.0791	-89.1368	80.4692	2.43095	-94.616	-88.2556	-11.026	-33.6326	-64.4406	-72.1749	64.8288	78.2456	-72.969	-69.5387	-3.95455	18.9164	-87.878	-81.6992	-41.5446	-33.9959	-95.1098	-89.2737	80.1066	95.388	-86.2112	-83.7191	21.0266	38.8398	11.1434	10.6688
-80.9538	-63.435	-21.9088	18.1929	-98.5665	-82.9894	41.6269	17.8931	-90.6614	-84.9588	-34.9911	99.4605	-97.1696	-100.641	49.0437	43.9817	-78.4534	-88.9557	6.29956	82.4352	-84.4162	-88.2584	76.4407	0.439974	-94.4315	-85.8594	-14.1297	-33.5358	-61.9407	-69.3915	59.4172	76.2138	-73.0275	-66.8785	-5.48034	15.8134	-88.0029	-80.2107	-42.176	-33.5994	-95.5568	-86.1333	76.4701	91.2054	-85.7437	-81.6101	17.3284	34.4092	11.4113	11.0025
-81.8556	-59.8351	-24.742	10.4934	-97.8119	-78.0865	32.1227	9.25453	-88.2813	-81.9587	-35.5555	90.6137	-96.0237	-97.636	42.4464	36.0438	-78.5032	-88.1639	2.24783	78.6389	-79.4435	-86.7745	72.2668	-0.151834	-93.7577	-82.0264	-17.1589	-34.1093	-58.5024	-66.0185	54.2404	74.2986	-72.3623	-63.9037	-8.02828	12.1674	-86.8318	-77.9761	-42.5112	-33.0751	-95.6416	-82.334	72.255	86.8832	-84.4559	-78.6103	13.4167	30.0961	11.9636	11.3343
-78.5577	-55.0962	-28.1609	2.11639	-95.9103	-71.4169	21.9876	1.12729	-84.1136	-77.1092	-36.1026	82.6625	-93.9473	-93.2271	34.8215	27.2947	-78.2511	-86.1425	-0.578114	71.7932	-72.7336	-84.1641	67.6994	0.0679528	-92.2978	-76.2842	-20.3096	-35.8752	-53.7417	-61.7969	49.0209	72.1534	-70.8628	-60.3594	-11.776	7.48409	-84.2632	-74.736	-42.9289	-32.7377	-94.7741	-77.7234	66.8772	81.854	-81.7685	-74.3687	9.14095	25.2673	12.8405	11.607
-73.165	-49.2205	-32.2197	-6.84742	-92.2915	-62.7735	11.9074	-6.38561	-77.5665	-69.9536	-36.9466	75.187	-90.7038	-86.928	26.2516	18.2974	-77.2611	-82.3799	-2.43221	66.2162	-63.7324	-79.8789	62.3619	0.493603	-89.6633	-68.1212	-23.8969	-39.0293	-47.2369	-56.324	43.4484	69.4551	-68.4301	-55.939	-16.8026	1.23747	-80.2702	-70.267	-43.7705	-33.196	-92.398	-72.1377	59.7947	75.5156	-77.5199	-68.5385	4.33595	20.0858	14.0613	11.7934
-68.9234	-42.3507	-36.8114	-16.0972	-86.3212	-52.0808	2.58175	-13.1368	-68.174	-60.2121	-38.4042	67.9466	-86.0508	-78.3394	17.0512	9.58369	-75.0443	-76.3621	-3.78725	60.0041	-52.0504	-73.3403	55.8567	-0.080787	-85.412	-57.1543	-28.2061	-43.0056	-38.6248	-49.0813	37.3002	65.8498	-64.8731	-50.3722	-23.1647	-6.72194	-74.818	-64.3283	-45.1749	-35.0438	-87.992	-65.4129	50.5142	67.4083	-71.6622	-60.8213	-1.11313	14.246	15.6233	11.9033
-64.3827	-34.782	-41.6598	-25.2015	-77.2909	-39.4563	-5.54451	-18.9494	-55.829	-47.9749	-41.0541	60.7788	-79.5896	-67.2326	7.69144	1.47709	-70.9883	-67.5363	-5.18011	51.7179	-38.0003	-64.0573	47.9188	-3.37472	-79.1444	-43.5809	-33.4579	-46.9069	-27.9168	-39.62	30.5015	60.9878	-59.8775	-43.4371	-30.8733	-16.1672	-67.7975	-56.7005	-46.7757	-38.4231	-81.0088	-57.3582	38.7894	57.3419	-63.8023	-51.0669	-7.24038	7.57096	17.5016	11.9478
-58.3729	-26.9926	-46.3855	-33.6997	-64.5259	-25.4435	-12.3885	-23.6357	-41.1206	-33.9632	-45.592	53.4244	-70.7952	-53.6122	-1.4387	-5.8923	-64.3317	-55.4692	-7.04738	46.5009	-22.9831	-51.9678	38.5355	-10.7114	-70.4652	-28.688	-39.7129	-50.0479	-15.9208	-27.9002	23.1686	54.6693	-53.0777	-35.0203	-39.7335	-26.6861	-59.0897	-47.3389	-47.7726	-42.8515	-70.8783	-47.8506	24.9854	45.5596	-53.7783	-39.477	-13.9438	0.6027	19.1804	11.8194
-45.0454	-19.6588	-50.6323	-41.1894	-47.8391	-11.2124	-18.0533	-27.0883	-25.5287	-19.5625	-52.0864	45.5346	-59.587	-37.9126	-9.96889	-12.4716	-54.3903	-40.366	-9.60048	48.2593	-9.09055	-37.8926	28.0951	-21.7592	-58.982	-14.6946	-46.5528	-52.1982	-4.2502	-14.6792	15.6582	47.0341	-44.2908	-25.3213	-49.0481	-37.5832	-48.9403	-36.6063	-47.6357	-47.6071	-57.258	-37.0864	10.328	32.8457	-41.382	-26.8175	-20.8633	-6.02029	19.6367	11.2895
-30.5392	-13.4817	-54.1915	-47.3573	-28.3608	1.64655	-22.582	-29.3715	-11.0289	-6.4028	-59.5171	36.9063	-47.1046	-21.3209	-17.3113	-18.1484	-41.159	-23.6792	-12.7741	46.653	1.87965	-23.6746	17.5477	-33.9351	-44.7274	-3.60219	-53.0421	-53.618	5.34461	-1.60887	8.55237	38.6508	-33.8824	-15.0613	-57.5737	-47.7073	-38.3893	-25.4141	-46.7293	-52.1833	-40.5946	-25.7539	-3.26586	20.4745	-28.0511	-14.3957	-27.3534	-12.6942	18.4888	10.3594
-14.4059	-8.91923	-56.9921	-51.9615	-8.91694	11.7043	-25.8857	-30.6567	0.6903	4.2341	-66.3147	28.1592	-35.6231	-5.74562	-22.7762	-22.684	-25.9475	-7.79165	-16.3184	41.9507	8.99366	-11.4133	8.34748	-43.9178	-28.8284	3.83635	-58.291	-54.7696	11.7193	9.41375	2.55442	30.5662	-22.9412	-5.38867	-64.0504	-55.7213	-29.1664	-15.0424	-46.0217	-56.2656	-22.5826	-14.9049	-13.8644	9.98064	-15.1826	-3.63794	-32.6921	-18.6654	16.2186	9.45347
-1.70627	-6.08882	-58.9413	-54.7748	7.15911	18.1765	-27.8114	-31.0921	8.6492	11.6745	-71.237	20.913	-27.5346	6.8457	-25.9275	-25.6754	-11.1503	5.25122	-19.9808	42.3606	12.2148	-2.44023	2.02277	-49.7872	-13.5098	8.04358	-61.8113	-55.9934	14.5509	17.1559	-1.63751	24.2295	-13.0216	2.55671	-67.7523	-60.5977	-23.0931	-6.63657	-45.9673	-59.3533	-5.72213	-5.54566	-20.1882	2.83184	-4.83308	4.4539	-36.2938	-22.449	14.2603	8.97941
[truncated: 2 more columns]

## Sheet: crpsf
SUB1				SUB2				SUB3				SUB4				SUB5				SUB6				SUB7				SUB8				SUB9				SUB10				SUB11				MEAN				SD
gait	gait_sleeve	onehop	onehop_sleeve	gait	gait_sleeve	onehop	onehop_sleeve	gait	gait_sleeve	onehop	onehop_sleeve	gait	gait_sleeve	onehop	onehop_sleeve	gait	gait_sleeve	onehop	onehop_sleeve	gait	gait_sleeve	onehop	onehop_sleeve	gait	gait_sleeve	onehop	onehop_sleeve	gait	gait_sleeve	onehop	onehop_sleeve	gait	gait_sleeve	onehop	onehop_sleeve	gait	gait_sleeve	onehop	onehop_sleeve	gait	gait_sleeve	onehop	onehop_sleeve	gait	gait_sleeve	onehop	onehop_sleeve	gait	gait_sleeve
-72.0036	-69.5271	-48.9777	-34.0023	-77.4168	-74.2792	-18.8791	-9.42768	-59.8729	-59.2154	-16.9248	-32.4203	-69.9997	-69.138	-19.8338	-22.5001	-66.3986	-73.1722	-47.3907	-36.3531	-73.8444	-77.5462	-51.2851	-22.8474	-63.8194	-62.4626	-42.5339	-45.1715	-66.179	-71.9735	-15.26	-13.1368	-61.5032	-61.5701	-44.686	-56.2623	-28.0027	-59.1111	-36.6509	-30.0019	-35.3607	-37.6311	-27.844	1.20562	-61.3092	-65.0569	-33.6605	-27.3562	15.6434	11.0991
-68.2539	-70.3649	-48.7599	-37.9878	-80.7783	-77.211	-21.9584	-12.1328	-62.6654	-59.8112	-14.6242	-23.1485	-66.5758	-66.7525	-20.4391	-22.2762	-76.3096	-79.373	-54.8857	-44.627	-78.4855	-80.7178	-52.1154	-33.1335	-69.1981	-68.5162	-41.1411	-33.6507	-71.8103	-73.4054	-15.7944	-13.6382	-67.4008	-65.4339	-48.3605	-57.8293	-35.2744	-66.7177	-37.2402	-32.439	-42.6382	-35.1573	-27.0734	-2.35238	-65.3991	-67.5874	-34.7629	-28.4741	14.244	12.5085
-54.177	-56.4679	-44.9088	-43.2146	-81.5394	-77.1656	-25.6042	-14.9561	-59.3379	-56.4981	-14.0291	-4.76347	-61.3797	-61.5417	-21.8475	-22.4727	-81.8755	-82.0444	-59.1303	-46.4043	-79.5806	-80.9737	-52.3221	-42.9228	-69.4159	-70.142	-32.66	-19.8685	-73.1354	-71.4192	-16.9269	-15.2025	-68.9907	-65.3959	-52.7473	-59.7711	-44.4205	-70.4624	-38.4907	-35.2351	-43.2468	-30.668	-25.9418	-7.45036	-65.1909	-65.7072	-34.9644	-28.3874	13.8966	14.5655
-32.6223	-32.0286	-37.3592	-42.8716	-81.5928	-74.1191	-28.3206	-16.511	-50.9009	-50.1233	-15.1424	5.59663	-54.9804	-54.8171	-23.8083	-23.3092	-84.1546	-81.7014	-60.8417	-49.143	-77.8318	-77.9414	-49.9634	-48.4883	-64.4085	-67.9395	-19.1092	-16.213	-70.6244	-66.1963	-18.4881	-17.6263	-66.8455	-62.3195	-56.7208	-61.7262	-52.1178	-71.0605	-39.9145	-37.637	-38.3169	-27.1554	-24.919	-13.543	-61.3087	-60.4911	-34.0534	-29.2247	17.0816	17.9005
-13.1013	-20.7833	-31.5687	-29.995	-59.3877	-65.7511	-29.0565	-16.7984	-41.7526	-43.1527	-16.8107	3.52877	-48.6438	-48.3214	-25.6667	-25.0377	-83.8487	-78.2534	-60.5	-49.0726	-72.4554	-69.144	-44.0556	-48.6219	-54.4917	-62.0054	-12.7644	-19.0831	-64.5705	-58.2045	-20.1965	-20.5791	-61.2125	-57.2415	-59.8297	-63.5544	-56.1586	-68.9772	-41.0787	-38.9971	-31.0536	-26.3259	-24.6714	-20.0203	-53.3342	-54.3782	-33.2908	-29.8392	19.4994	18.1378
-5.6129	-21.5656	-30.7824	-21.0081	-27.4842	-50.5665	-28.0285	-17.2232	-36.5976	-38.5083	-18.8421	-2.42854	-44.0876	-43.8343	-26.7086	-27.9734	-81.031	-71.3838	-58.1857	-41.8711	-61.3714	-55.2029	-39.5163	-43.8004	-44.0087	-53.1332	-14.3803	-23.8986	-56.5184	-49.4836	-21.906	-23.7237	-52.8379	-51.6643	-62.0914	-65.278	-56.2092	-64.4936	-41.8279	-38.538	-25.2974	-28.356	-25.6696	-26.3094	-44.6415	-48.0175	-33.449	-30.1866	20.5021	14.5306
-10.4459	-26.1147	-33.6031	-23.5656	-24.1138	-37.3994	-26.5973	-19.065	-36.5273	-37.5897	-22.0595	-9.63754	-42.4974	-42.3527	-26.6172	-32.3359	-75.1662	-62.3269	-54.0803	-31.193	-48.6615	-45.3127	-40.5353	-38.2022	-38.8392	-44.626	-18.3532	-30.0687	-49.8799	-43.3236	-23.687	-26.8492	-44.5401	-47.3083	-63.5217	-66.8029	-53.7096	-58.3751	-41.9583	-35.1826	-23.2831	-32.45	-28.03	-32.0538	-40.6968	-43.3799	-34.4585	-31.3597	17.4282	10.4521
-27.1652	-32.377	-38.5212	-27.3321	-29.1277	-33.6	-26.1377	-22.5915	-40.2541	-40.1009	-26.9034	-17.2414	-43.887	-43.7114	-25.6559	-37.9944	-66.4959	-54.7032	-49.4601	-21.6111	-42.7504	-43.8723	-45.1134	-36.3516	-39.4702	-40.1459	-23.4406	-37.685	-47.0027	-41.3805	-25.773	-29.9429	-39.7271	-45.1883	-63.8455	-68.331	-50.8313	-52.3701	-40.3466	-30.5731	-25.2848	-37.466	-31.6393	-37.2578	-41.0906	-42.2651	-36.0761	-33.3556	11.7383	6.89845
-47.5448	-39.5651	-44.8051	-31.9118	-35.296	-35.8573	-27.3618	-27.4768	-46.0741	-44.9576	-32.4244	-24.281	-47.4018	-46.9331	-24.5761	-44.4629	-58.2269	-51.1309	-46.4589	-19.7817	-43.9205	-47.4309	-51.0828	-38.6005	-43.0559	-40.1978	-29.7209	-46.3026	-47.4923	-42.9569	-28.4864	-33.2214	-39.1174	-45.2296	-56.1273	-62.7838	-49.0946	-48.2951	-36.5499	-28.2448	-30.4327	-42.4101	-36.3922	-42.3008	-44.3325	-44.0877	-37.6351	-36.3062	7.43201	4.42788
-56.8477	-46.8491	-51.9933	-37.7581	-42.2617	-40.3881	-30.4531	-33.3208	-52.4773	-50.8925	-37.2215	-29.7924	-51.9061	-50.8759	-24.4346	-51.2457	-53.9223	-51.2312	-46.3408	-25.8466	-48.4284	-53.0122	-58.0855	-43.5178	-47.29	-43.0862	-36.9052	-54.7891	-49.8329	-46.5804	-32.1418	-37.104	-41.2792	-46.7496	-44.4738	-49.3052	-48.997	-46.7822	-33.3944	-28.6368	-37.3642	-46.6526	-42.3553	-47.8561	-48.237	-47.5545	-39.7999	-39.9248	5.86771	3.74576
-57.3385	-53.4384	-59.6825	-44.5395	-49.3531	-45.67	-35.2786	-39.8312	-58.399	-56.7881	-41.2347	-33.3394	-56.3904	-54.6891	-26.2973	-58.1545	-53.5868	-53.4662	-48.9246	-38.6923	-54.0785	-59.1052	-66.2851	-50.143	-51.0247	-47.0404	-44.1997	-62.0437	-52.7869	-50.989	-36.9276	-42.0573	-44.6161	-49.0034	-40.096	-42.3969	-50.4635	-47.3949	-33.1508	-30.2997	-44.6705	-49.8963	-49.6478	-54.6774	-52.0644	-51.5892	-43.7932	-45.1068	4.63353	4.2814
-58.0263	-58.7634	-67.4219	-52.0511	-56.017	-50.9652	-41.5051	-46.8218	-63.3381	-61.8997	-45.6489	-35.3827	-60.2241	-57.9364	-30.8045	-65.2651	-55.2716	-56.6385	-53.4344	-53.0478	-59.6824	-64.6961	-75.5837	-57.3684	-53.8354	-50.8956	-50.761	-67.8526	-55.6456	-55.3155	-42.8083	-48.3224	-48.06	-51.425	-40.9598	-44.9206	-53.1788	-49.3703	-34.9994	-32.9304	-51.2737	-52.0679	-58.1079	-63.232	-55.8685	-55.4521	-49.2759	-51.5632	4.33414	5.01137
-59.3366	-62.6305	-74.7961	-59.9597	-61.6775	-55.8289	-48.7032	-54.092	-67.2184	-65.9013	-51.0935	-36.9096	-63.236	-60.5098	-37.7749	-72.6809	-57.5465	-60.0324	-59.1313	-67.2218	-64.4884	-69.2059	-85.4199	-63.8518	-55.6798	-54.0415	-56.2134	-72.7406	-58.0705	-59.0331	-49.5314	-55.7674	-51.0216	-53.6824	-43.7176	-49.9717	-56.64	-52.0106	-37.9579	-36.9764	-56.5781	-53.2558	-67.2306	-73.3942	-59.2267	-58.7393	-55.5973	-58.506	4.59801	5.5887
-60.9638	-65.1537	-81.5916	-67.9197	-66.0996	-59.9807	-56.4326	-61.4138	-70.1627	-68.7799	-57.0755	-38.8874	-65.5574	-62.4718	-46.2516	-80.3815	-59.7981	-63.2133	-65.4092	-83.7238	-68.1908	-72.4609	-95.098	-69.0807	-56.7061	-56.281	-60.7114	-77.3406	-59.9038	-61.8822	-56.7665	-63.9972	-53.2649	-55.6362	-48.1682	-55.7811	-60.2365	-54.7718	-41.6919	-42.7178	-60.4049	-53.6721	-76.4881	-84.4979	-61.9353	-61.3003	-62.335	-65.9765	5.04647	6.00459
-61.2881	-66.6132	-87.807	-75.6374	-69.2824	-63.2752	-64.3049	-68.6517	-72.3487	-70.6942	-63.0466	-41.8346	-67.3531	-63.9351	-55.1792	-88.214	-61.8014	-65.9416	-71.7939	-99.5019	-70.7974	-74.5704	-104.215	-73.7146	-57.1422	-57.6806	-64.7357	-82.1488	-61.0929	-63.8207	-64.2384	-72.5623	-54.8233	-57.2448	-53.9303	-62.49	-63.4487	-57.2853	-46.1353	-49.8933	-62.875	-53.58	-85.5604	-95.7234	-63.8412	-63.1492	-69.177	-73.6702	5.55182	6.31645
-60.6246	-67.3537	-93.5094	-82.9349	-71.3814	-65.6831	-71.993	-75.759	-73.9393	-71.8772	-68.9549	-45.7914	-68.6826	-65.0151	-63.9862	-95.936	-63.4837	-68.1482	-77.9865	-114.867	-72.467	-75.7848	-112.711	-78.6429	-57.2468	-58.4208	-68.8023	-87.5098	-61.6965	-64.9626	-71.7516	-81.1035	-55.8841	-58.502	-60.4083	-69.9243	-65.9713	-59.3773	-51.2267	-57.6854	-64.2758	-53.2321	-94.3285	-106.394	-65.0594	-64.3961	-75.9689	-81.5044	6.05763	6.56601
-62.0932	-67.6976	-98.774	-89.733	-72.6413	-67.2724	-79.2513	-82.6737	-75.0506	-72.5854	-74.8667	-50.6416	-69.5533	-65.8084	-72.524	-103.279	-64.8671	-69.8822	-83.8821	-128.164	-73.428	-76.3914	-120.617	-84.083	-57.2998	-58.7274	-73.1785	-93.6361	-61.8455	-65.5128	-79.1631	-89.4011	-56.6491	-59.444	-67.1973	-77.9142	-67.723	-61.0537	-56.592	-65.1392	-64.9068	-52.8276	-102.765	-116.049	-66.0053	-65.2003	-82.6191	-89.1559	6.28431	6.76763
-62.8579	-67.8836	-103.713	-96.0119	-73.3372	-68.1939	-85.9974	-89.3073	-75.7746	-73.0603	-80.6493	-56.4756	-70.0216	-66.3795	-80.7493	-110.04	-66.0279	-71.271	-89.504	-136.32	-73.9358	-76.6437	-127.874	-89.8521	-57.5409	-58.879	-77.8491	-100.645	-61.6969	-65.6954	-86.3561	-97.3502	-57.2407	-60.1582	-74.1159	-86.1631	-68.8106	-62.4242	-61.7155	-71.7135	-64.9829	-52.493	-110.842	-124.475	-66.5661	-65.7347	-89.0333	-96.214	6.40786	6.91956
-61.5942	-68.0653	-108.431	-101.81	-73.716	-68.6485	-92.3066	-95.6183	-76.2234	-73.4717	-86.1094	-63.5633	-70.2107	-66.7716	-88.5746	-116.126	-67.0425	-72.4707	-94.865	-143.252	-74.2216	-76.7135	-134.381	-95.8281	-58.0422	-59.1703	-82.7327	-108.367	-61.4558	-65.6868	-93.2182	-104.893	-57.6985	-60.7422	-81.1042	-94.3991	-69.4643	-63.6097	-66.418	-77.4378	-64.6511	-52.2722	-118.512	-131.704	-66.7564	-66.1475	-95.1502	-103	6.5597	7.01901
-60.7089	-68.3327	-112.957	-107.24	-73.9688	-68.8323	-98.2687	-101.645	-76.5593	-73.8855	-91.1161	-71.7803	-70.2771	-67.0304	-95.853	-121.537	-67.9871	-73.5834	-99.9049	-149.274	-74.4562	-76.6808	-140.106	-101.827	-58.7103	-59.7819	-87.8131	-116.353	-61.3432	-65.5986	-99.6415	-111.994	-58.0279	-61.2557	-88.1015	-102.45	-69.9479	-64.674	-70.9098	-82.6703	-64.0569	-52.1314	-125.724	-137.92	-66.9131	-66.5261	-100.945	-109.517	6.6732	7.07587
-62.4014	-68.7399	-117.231	-112.475	-74.2276	-68.9109	-103.899	-107.46	-76.9788	-74.3069	-95.5141	-80.3158	-70.3832	-67.2127	-102.385	-126.355	-68.9626	-74.6575	-104.549	-151.9	-74.7397	-76.5639	-145.095	-107.686	-59.4701	-60.6629	-93.0817	-124.194	-61.4866	-65.5021	-105.543	-118.678	-58.2326	-61.7203	-95.011	-110.251	-70.4614	-65.5986	-75.431	-87.8264	-63.3986	-52.0343	-132.451	-143.334	-67.3402	-66.9009	-106.381	-115.498	6.60154	7.11566
-63.1925	-69.3233	-121.036	-117.689	-74.5786	-69.0198	-109.184	-113.132	-77.6462	-74.7522	-99.1268	-88.2379	-70.6749	-67.3855	-108.005	-130.764	-70.0582	-75.7654	-108.759	-154.654	-75.1055	-76.3638	-149.378	-113.527	-60.3811	-61.6023	-98.4348	-131.495	-61.9028	-65.452	-110.88	-125.042	-58.3308	-62.1466	-101.736	-117.784	-71.1007	-66.3372	-79.9589	-93.2964	-62.9484	-52.0023	-138.711	-148.096	-67.8109	-67.2864	-111.383	-121.247	6.66917	7.16793
-64.4361	-70.0892	-123.927	-122.932	-75.0801	-69.2389	-114.15	-118.717	-78.6303	-75.2667	-101.916	-95.117	-71.2257	-67.6264	-112.65	-135.044	-71.2749	-76.9733	-112.527	-158.167	-75.5378	-76.1182	-152.942	-119.569	-61.5615	-62.4528	-103.64	-137.484	-62.5796	-65.4739	-115.632	-131.203	-58.3467	-62.5352	-108.193	-124.963	-71.8847	-66.8742	-84.2652	-99.487	-62.978	-52.0823	-144.519	-152.287	-68.5032	-67.7028	-115.851	-126.815	6.7478	7.25227
-67.9182	-71.0029	-125.19	-128	-75.7626	-69.5844	-118.855	-124.256	-79.8817	-75.8935	-104.041	-100.954	-71.9906	-68.0206	-116.345	-139.452	-72.5067	-78.2145	-115.815	-160.213	-76.0341	-75.9355	-155.825	-125.854	-63.0416	-63.2585	-108.386	-140.548	-63.5038	-65.5317	-119.801	-137.229	-58.2896	-62.886	-114.276	-131.573	-72.7854	-67.2064	-88.2023	-106.849	-63.6106	-52.299	-149.879	-155.963	-69.575	-68.1666	-119.692	-131.899	6.75423	7.36693
-67.5851	-72.0236	-123.874	-132.395	-76.6143	-70.0534	-123.354	-129.745	-81.2652	-76.6488	-105.682	-105.901	-72.8896	-68.6412	-119.193	-144.093	-73.6139	-79.3181	-118.494	-161.538	-76.6573	-75.9565	-158.178	-132.304	-64.7175	-64.1752	-112.39	-138.5	-64.6456	-65.5754	-123.437	-143.115	-58.1863	-63.2276	-119.836	-137.3	-73.7407	-67.3479	-91.9256	-115.71	-64.7548	-52.6339	-154.837	-159.214	-70.4246	-68.691	-122.836	-136.347	6.91286	7.49397
-65.3844	-73.1458	-119.061	-135.403	-77.5876	-70.6578	-127.681	-135.048	-82.6359	-77.5307	-106.753	-110.209	-73.9297	-69.5176	-121.336	-148.954	-74.5485	-80.2294	-120.348	-158.677	-77.4861	-76.3134	-160.156	-138.918	-66.4416	-65.3195	-115.528	-131.05	-65.9713	-65.6552	-126.638	-148.784	-58.1632	-63.6157	-124.613	-141.722	-74.6711	-67.3964	-95.844	-125.807	-66.191	-53.0296	-159.482	-162.171	-71.1828	-69.3101	-125.222	-139.704	7.21565	7.63448
-67.3895	-74.3937	-110.449	-136.184	-78.6504	-71.4189	-131.861	-139.779	-83.9206	-78.548	-106.514	-114.179	-75.1768	-70.6235	-122.885	-153.964	-75.4261	-81.0832	-121.16	-150.613	-78.5289	-77.1231	-161.761	-145.861	-68.1126	-66.7182	-117.8	-120.113	-67.4899	-65.9192	-129.517	-154.053	-58.4544	-64.1151	-128.147	-144.23	-75.5142	-67.543	-100.345	-135.972	-67.6862	-53.4374	-163.874	-164.963	-72.3954	-70.0839	-126.756	-141.81	7.2126	7.81464
-69.0093	-75.7899	-98.7706	-133.9	-79.8207	-72.358	-135.879	-143.176	-85.1634	-79.7334	-103.396	-118.021	-76.6591	-71.906	-123.907	-158.923	-76.478	-82.0479	-120.771	-134.267	-79.7299	-78.4279	-162.73	-153.364	-69.6727	-68.3356	-118.875	-105.587	-69.2541	-66.4835	-132.176	-158.634	-59.2605	-64.7933	-129.798	-144.038	-76.2648	-67.9913	-105.526	-144.506	-69.0412	-53.8755	-167.965	-167.683	-73.6685	-71.0675	-127.254	-142.009	7.18654	8.04601
-67.0826	-77.3375	-85.4435	-127.982	-81.1445	-73.4895	-139.642	-144.036	-86.4712	-81.1135	-96.1907	-121.763	-78.3491	-73.3216	-124.51	-163.453	-77.9497	-83.2266	-119.003	-111.692	-81.0531	-80.1363	-162.483	-161.405	-71.0813	-70.0702	-117.784	-83.2868	-71.2302	-67.3594	-134.661	-162.142	-60.5935	-65.6887	-128.895	-140.405	-76.987	-68.8483	-111.153	-149.961	-70.1153	-54.4517	-171.389	-170.406	-74.7325	-72.2767	-126.468	-139.685	7.43453	8.30585
-68.623	-79.0057	-71.7723	-118.572	-82.6565	-74.8084	-142.985	-140.835	-87.8953	-82.6613	-86.2386	-125.342	-80.1954	-74.8413	-124.887	-166.954	-79.9834	-84.6543	-115.497	-94.1848	-82.5139	-82.0608	-160.171	-168.993	-72.3495	-71.7727	-113.572	-53.0459	-73.2168	-68.4879	-136.909	-164.061	-62.3169	-66.784	-125.003	-133.086	-77.7801	-70.0795	-116.957	-151.305	-70.8952	-55.3069	-173.211	-173.182	-76.2205	-73.6784	-124.291	-135.414	7.4372	8.54989
-72.8961	-80.7174	-58.5351	-106.623	-84.3408	-76.2873	-145.689	-132.146	-89.3873	-84.2935	-76.1932	-128.746	-82.149	-76.4385	-125.222	-168.502	-82.5126	-86.2812	-109.753	-84.8719	-84.1246	-84.009	-154.917	-173.778	-73.5615	-73.3396	-106.287	-23.9049	-75.0044	-69.792	-138.734	-163.74	-64.313	-68.0226	-118.14	-122.718	-78.7462	-71.5819	-122.913	-147.428	-71.5219	-56.4994	-171.94	-175.975	-78.0507	-75.2057	-120.757	-129.857	7.27678	8.73651
-75.1762	-82.3802	-46.0376	-93.2834	-86.1207	-77.8833	-147.394	-117.458	-90.8637	-85.9159	-65.8286	-131.936	-84.17	-78.0901	-125.563	-166.926	-85.3079	-87.9655	-101.617	-78.8226	-85.8533	-85.8708	-146.273	-173.386	-74.7907	-74.7918	-96.7371	-0.427881	-76.5563	-71.2165	-139.819	-160.45	-66.5266	-69.3496	-108.849	-110.6	-79.9647	-73.2696	-129.108	-137.753	-72.201	-57.9811	-165.787	-178.614	-79.7755	-76.7922	-115.728	-122.696	7.34422	8.83941
-76.9134	-83.9436	-34.2281	-79.1903	-87.9042	-79.5461	-147.555	-98.1793	-92.2862	-87.4529	-52.1668	-134.782	-86.2164	-79.7791	-125.851	-161.229	-88.138	-89.5143	-91.9115	-69.4154	-87.637	-87.6497	-134.823	-167.772	-76.047	-76.2735	-85.1426	21.7334	-77.9997	-72.7441	-139.745	-153.574	-68.9016	-70.7477	-98.0673	-97.8167	-81.4394	-75.0794	-135.409	-123.814	-73.0979	-59.6822	-153.342	-180.71	-81.5074	-78.4011	-108.931	-113.159	7.4409	8.8399
-78.787	-85.4029	-22.7436	-64.481	-89.6382	-81.2301	-145.503	-77.8587	-93.6648	-88.85	-34.5273	-137.2	-88.244	-81.4831	-125.982	-151.535	-90.8506	-90.7727	-82.1307	-59.8909	-89.4165	-89.4015	-122.134	-159.17	-77.2958	-77.958	-70.7829	40.0899	-79.5153	-74.3738	-138.046	-143.115	-71.3744	-72.237	-86.6249	-84.6418	-83.0873	-76.9385	-141.337	-107.66	-74.2732	-61.5416	-134.941	-181.51	-83.2861	-80.0172	-100.432	-102.452	7.48971	8.72832
-81.9255	-86.7548	-10.9553	-49.3219	-91.3112	-82.9122	-140.548	-60.3143	-95.0077	-90.0833	-16.5851	-139.288	-90.2201	-83.1669	-125.732	-139.757	-93.3569	-91.6947	-73.1975	-46.5639	-91.1589	-91.1539	-109.482	-148.707	-78.4399	-79.9044	-53.6361	40.9901	-81.224	-76.095	-134.273	-130.229	-73.8845	-73.8506	-74.7662	-70.9492	-84.7887	-78.7603	-145.879	-88.0319	-75.6639	-63.4636	-113.418	-179.769	-85.1801	-81.6218	-90.7702	-91.9946	7.43072	8.52124
-82.4332	-87.9636	1.7957	-34.2675	-92.9343	-84.5952	-132.136	-47.1476	-96.2996	-91.1661	-2.97029	-141.371	-92.113	-84.7937	-124.683	-128.291	-95.6177	-92.3275	-64.8358	-20.9146	-92.8562	-92.8983	-96.7809	-133.743	-79.356	-82.0202	-35.5682	22.3816	-83.1341	-77.8701	-128.068	-116.88	-76.3671	-75.6189	-62.4212	-57.0245	-86.4369	-80.4901	-146.899	-62.6333	-77.1538	-65.3128	-92.3959	-173.79	-86.7911	-83.187	-80.4511	-81.2436	7.48648	8.26178
-83.7801	-88.973	15.4464	-20.0985	-94.5395	-86.2995	-120.23	-37.7532	-97.5152	-92.135	2.42118	-143.926	-93.877	-86.3591	-122.324	-117.818	-97.6413	-92.7624	-55.9761	3.70899	-94.5123	-94.6266	-82.927	-107.726	-80.0608	-84.118	-18.5353	5.22725	-85.1731	-79.6428	-119.412	-104.501	-78.7668	-77.5689	-49.8331	-43.4179	-87.9688	-82.1376	-141.149	-34.6653	-78.6579	-66.9859	-73.927	-162.04	-88.4084	-84.6917	-69.677	-69.3645	7.50154	7.99693
-86.1539	-89.7317	28.0785	-7.46413	-96.1637	-88.0508	-105.696	-30.6572	-98.6326	-93.0361	-1.12228	-147.284	-95.4789	-87.9021	-118.333	-107.017	-99.4432	-93.1364	-45.3058	9.30481	-96.127	-96.3304	-66.9578	-71.2175	-80.74	-85.9713	-2.67863	-1.2274	-87.241	-81.373	-108.932	-93.2516	-81.0416	-79.7123	-37.3143	-29.8322	-89.3691	-83.7484	-126.65	-10.3007	-80.1264	-68.4706	-58.2136	-145.063	-90.0471	-86.133	-58.466	-57.6372	7.45326	7.75888
-86.3571	-90.1996	36.3763	3.20379	-97.8208	-89.8444	-90.0725	-23.9646	-99.6307	-93.916	-6.47809	-151.09	-96.9207	-89.4515	-112.93	-93.585	-100.997	-93.6478	-31.618	11.4269	-97.6828	-97.9632	-49.2391	-39.2721	-81.5052	-87.4165	12.2658	-3.12909	-89.2413	-83.0303	-97.8112	-82.483	-83.1558	-82.0264	-24.1514	-15.0679	-90.6504	-85.3535	-105.052	7.87459	-81.5052	-69.8046	-44.3909	-126.354	-91.4061	-87.514	-46.6455	-46.5855	7.51975	7.56775
-88.3446	-90.3501	38.7795	11.4934	-99.4999	-91.6141	-74.9041	-13.3826	-100.479	-94.7929	-6.84545	-153.738	-98.2062	-90.9841	-107.07	-75.604	-102.26	-94.4747	-14.075	25.6807	-99.137	-99.4309	-31.5653	-18.4682	-82.2867	-88.41	24.6547	-2.92622	-91.0655	-84.5639	-87.1393	-71.3392	-85.0945	-84.4453	-8.1982	-0.688391	-91.8381	-86.9312	-78.701	16.9766	-82.7438	-70.9942	-31.1037	-108.898	-92.8141	-88.8174	-34.197	-35.5358	7.46694	7.44192
-89.2703	-90.1558	37.0838	16.7984	-101.167	-93.257	-61.2696	8.15303	-101.139	-95.6246	-4.17909	-152.361	-99.3079	-92.4577	-102.009	-53.7066	-103.216	-95.6037	7.16321	41.3029	-100.417	-100.618	-15.9024	-6.77464	-82.9944	-88.9803	31.2491	-1.66019	-92.5849	-85.92	-77.3282	-59.1789	-86.8606	-86.859	9.35152	7.48373	-92.9466	-88.3998	-50.0824	15.408	-83.813	-71.9977	-17.072	-92.5527	-93.9743	-89.9885	-22.0904	-25.1898	7.46972	7.39352
-88.9454	-89.5615	34.1282	18.5524	-102.752	-94.6923	-49.5841	32.4756	-101.571	-96.322	-0.863306	-144.661	-100.182	-93.8519	-98.3136	-31.5238	-103.873	-96.7822	29.8668	53.9835	-101.415	-101.406	-3.42629	-3.19802	-83.6063	-89.1905	30.4901	0.105128	-93.6845	-87.0636	-68.1451	-45.9957	-88.4503	-89.1265	19.8303	8.73637	-93.9457	-89.6709	-24.4318	9.61465	-84.6901	-72.7884	-2.44087	-76.0918	-94.8286	-90.9505	-12.0809	-16.1821	7.53783	7.41323
-89.641	-88.4838	31.6687	16.9135	-104.168	-95.8947	-39.6136	38.2378	-101.713	-96.7847	2.831	-132.582	-100.798	-95.1478	-95.3747	-12.2274	-104.235	-97.6952	50.3056	67.3756	-102.002	-101.704	5.52313	-1.01854	-84.1417	-89.1116	24.7832	1.69318	-94.2761	-87.9563	-59.0987	-32.5054	-89.8555	-91.1136	20.5566	8.38439	-94.751	-90.6721	-3.16057	7.62457	-85.3668	-73.3968	10.0422	-59.0406	-95.5407	-91.6327	-4.68519	-8.83136	7.48533	7.47508
-89.4134	-86.8271	30.3741	13.2592	-105.32	-96.882	-30.6326	34.4722	-101.451	-96.9225	7.81467	-121.1	-101.158	-96.2956	-91.5663	2.90088	-104.284	-98.1289	65.8988	79.0179	-102.117	-101.507	11.3138	2.822	-84.5658	-88.7787	18.6791	2.95343	-94.2535	-88.5292	-49.7611	-19.7884	-91.0445	-92.7035	18.7163	8.54488	-95.2605	-91.3049	15.0892	9.33266	-85.8723	-73.8575	17.1252	-41.8636	-95.8855	-91.9761	1.18647	-2.67719	7.44265	7.57481
-89.2689	-84.4729	30.5382	9.735	-106.104	-97.683	-21.5577	29.8439	-100.616	-96.6559	15.756	-111.244	-101.282	-97.2383	-84.5501	12.9374	-103.969	-97.9606	75.9344	84.9712	-101.781	-100.938	14.8303	7.08924	-84.6749	-88.1363	14.7844	5.18719	-93.4457	-88.694	-39.9536	-9.03607	-91.9122	-93.7637	17.626	9.21036	-95.4054	-91.4392	26.4785	12.8997	-86.2514	-74.1431	18.2205	-25.462	-95.8828	-91.9205	6.19153	2.37562	7.35025	7.75612
-86.697	-81.2667	34.9552	7.81545	-106.412	-98.2933	-11.2119	26.5303	-98.9989	-95.8855	27.203	-99.6077	-101.198	-97.9537	-71.7817	17.4995	-103.206	-97.0544	80.7926	87.8522	-100.999	-100.112	17.0161	11.1816	-84.2027	-86.9857	13.2292	9.42429	-91.6207	-88.3523	-29.8539	-1.42641	-92.2982	-94.1424	17.4699	10.2317	-95.1589	-90.9527	23.0338	17.4457	-86.5069	-74.156	15.0857	-10.9453	-95.209	-91.3777	10.5398	6.9092	7.50931	8.09309
-84.6968	-77.0405	53.0324	7.68263	-106.194	-98.6385	0.593881	24.7203	-96.3654	-94.4404	34.236	-81.7071	-100.907	-98.4461	-52.1039	17.4467	-101.894	-95.1838	81.6531	93.5748	-99.6767	-98.9904	18.4583	15.1793	-83.0379	-85.0098	13.4279	11.8015	-88.5623	-87.3542	-20.0547	2.52668	-92.0594	-93.706	18.0034	11.7937	-94.4954	-89.7277	11.4518	22.1373	-86.5929	-73.7578	10.2963	0.451287	-94.0438	-90.2086	15.3631	11.4188	7.692	8.66238
-82.1754	-71.6557	79.2244	8.95267	-105.479	-98.6041	11.7206	24.048	-92.4688	-92.0543	25.9211	-56.3675	-100.334	-98.7033	-28.5623	14.5712	-99.9159	-92.0092	80.3521	99.4333	-97.6731	-97.4043	19.4789	19.8128	-81.1691	-81.9022	15.0471	6.58111	-84.1758	-85.4802	-11.5072	3.61382	-91.0727	-92.3552	19.2395	14.6383	-93.3356	-87.6081	7.31291	26.7419	-86.4429	-72.7633	5.79496	7.96703	-92.2039	-88.2309	20.3656	15.4539	8.08911	9.53583
-80.2578	-65.0686	84.4203	11.3224	-104.314	-98.1	19.3096	24.2262	-87.137	-88.4005	3.88476	-29.4685	-99.3104	-98.6593	-7.31249	10.8115	-97.1103	-87.0885	79.2519	103.503	-94.7957	-95.0299	20.3746	27.6866	-78.5201	-77.44	18.5679	-4.544	-78.4773	-82.4928	-5.16319	3.45441	-89.1781	-89.9805	21.6365	20.6634	-91.5001	-84.4315	8.23413	38.401	-85.9757	-70.928	2.24588	11.9083	-89.6888	-85.2381	22.3136	19.8149	8.66523	10.7607
-77.6379	-57.4534	74.042	14.7819	-102.661	-97.0649	22.9033	30.5768	-80.3573	-83.1996	-22.3889	-8.20491	-97.5834	-98.156	7.97874	7.50267	-93.1571	-80.0033	81.157	109.179	-90.6594	-91.3119	21.4193	44.6772	-74.9569	-71.4415	26.5456	-15.6093	-71.4565	-78.1989	-1.33965	3.37029	-86.1687	-86.4069	26.6299	33.2368	-88.6712	-80.1301	11.9313	61.8298	-85.0325	-67.981	-0.40816	13.4002	-86.2129	-81.0316	22.5882	26.7946	9.63087	12.3195
-73.8205	-49.3165	56.7422	20.169	-100.354	-95.3813	23.9219	54.4075	-72.24	-76.3915	-40.4212	4.58405	-94.7931	-96.9323	16.7938	5.06415	-87.5015	-70.6957	88.557	116.411	-84.6926	-85.6226	22.7643	65.028	-70.3384	-63.8685	42.5013	-23.2898	-63.1654	-72.5232	0.585848	3.83478	-81.7705	-81.4016	37.8885	51.158	-84.3863	-74.6536	18.91	68.2888	-83.2961	-63.6802	-2.27002	13.6241	-81.4872	-75.497	24.1794	34.4799	10.9339	14.0923
-63.0793	-41.394	33.0298	31.001	-97.0962	-92.815	23.8899	67.2133	-63.0762	-68.2557	-31.8414	9.79314	-90.451	-94.6603	20.0279	3.33498	-79.5553	-59.8849	99.5455	125.596	-76.5084	-77.67	24.3638	63.6974	-64.5502	-55.1472	57.4269	-28.8472	-54.1197	-65.5644	1.71407	4.75573	-75.6014	-74.7338	57.7631	61.5489	-78.1488	-67.825	29.1451	47.9184	-80.2818	-57.9231	-3.18257	13.3326	-74.7698	-68.7158	28.3529	36.304	12.7164	15.8312
-54.7231	-34.3337	1.31556	50.8559	-92.5019	-89.0584	23.7987	56.8249	-53.5267	-59.3919	-13.7592	11.0566	-84.0706	-90.9762	19.2848	2.09146	-69.2597	-49.0435	105.364	136.491	-66.4495	-67.9025	26.0169	33.8024	-57.6279	-46.2365	55.7906	-35.1332	-45.3369	-57.6311	2.91763	5.96844	-67.4342	-66.3462	73.3768	59.0718	-69.7561	-59.6437	34.7743	11.3587	-75.4228	-50.9105	-2.72602	12.8475	-66.919	-61.0431	29.6504	31.3851	13.8391	17.1803
-48.5317	-28.4462	-31.6424	66.7812	-86.1996	-83.7729	24.1396	39.3674	-44.5112	-50.6119	-13.5555	12.0493	-75.5363	-85.54	16.5142	1.32879	-57.6408	-39.5495	100.597	138.029	-55.7377	-57.454	27.5434	-13.1655	-49.9119	-38.1076	36.9574	-43.6602	-37.7714	-49.3245	4.53181	7.47989	-57.7526	-56.7337	73.8157	47.9713	-59.7378	-50.7311	27.0236	-31.1973	-68.3433	-43.2591	-0.607246	12.2358	-58.334	-53.0482	24.1197	21.5654	14.0108	17.7888
-40.7732	-23.6874	-54.775	67.8034	-78.0177	-76.6754	25.0158	19.7387	-36.7546	-42.6692	-24.4386	14.028	-65.461	-78.2066	13.5904	1.27774	-46.4936	-31.9239	86.2295	117.503	-45.8016	-47.5682	29.0981	-46.3465	-42.0544	-31.2331	4.61162	-53.8805	-31.8563	-41.4369	6.44404	9.45765	-47.8587	-47.068	61.5949	31.8028	-49.3833	-42.1215	9.60741	-60.1451	-59.3228	-35.8513	2.41905	11.4624	-49.4343	-45.3129	14.4907	10.2456	13.3986	17.4375
-35.9111	-19.7826	-67.5723	58.0139	-68.2607	-67.85	26.2217	-1.30063	-30.4793	-35.9598	-36.6538	16.5536	-55.1144	-69.2687	11.586	2.3293	-37.1489	-25.9638	66.4281	86.4477	-37.4625	-39.0351	31.9298	-55.0419	-34.7843	-25.6119	-30.7058	-63.6421	-27.4827	-34.5887	8.39883	12.1726	-39.1084	-38.5447	39.0476	11.3516	-40.0351	-34.6196	-10.9454	-59.0174	-49.5176	-29.4173	3.93663	10.5195	-41.3914	-38.2402	3.78831	1.67147	11.8449	16.1263
-30.7458	-16.3767	-74.8937	40.903	-57.8656	-58.0435	27.6335	-22.4335	-25.472	-30.4824	-46.985	19.2214	-45.7902	-59.587	10.5724	4.83038	-29.8471	-21.1602	46.8713	63.9729	-30.7941	-32.0258	39.9631	-54.2206	-28.5957	-21.0016	-53.7445	-71.2032	-24.1848	-28.9835	10.2955	15.9883	-32.0953	-31.6675	6.87396	-13.32	-32.3632	-28.4858	-31.6214	-40.5539	-40.4257	-24.2485	1.41596	9.51138	-34.3799	-32.0057	-5.78354	-4.30035	9.95475	14.1627
-25.9167	-13.1382	-49.924	16.4867	-48.0783	-48.4308	31.924	-41.2417	-21.3078	-26.0042	-54.4111	22.1707	-38.1497	-50.3214	10.2345	8.56823	-24.149	-16.9284	31.3901	45.4973	-25.3971	-26.2746	51.4745	-56.8344	-23.6045	-17.0593	-58.9867	-76.0772	-21.3544	-24.4442	12.3212	21.2226	-26.6503	-26.2409	-28.8419	-38.2092	-26.3327	-23.5569	-50.0849	-36.7706	-33.0128	-20.2442	-5.76412	8.69009	-28.5412	-26.6039	-10.0608	-11.4998	8.16623	12.0829
-21.6267	-9.78209	-18.4064	-12.6097	-39.7906	-39.9687	42.0982	-56.4139	-17.5344	-22.2246	-59.6326	25.7101	-32.1558	-42.3369	10.3615	12.2825	-19.4531	-12.7091	22.0914	47.3172	-20.689	-21.3469	52.0279	-63.5729	-19.6057	-13.4075	-50.4546	-78.7437	-18.3913	-20.5704	15.0128	27.5147	-22.2917	-21.7583	-57.5058	-57.7882	-21.5541	-19.4729	-63.5917	-47.8196	-27.4241	-17.1034	-16.7555	8.40867	-23.6833	-21.8801	-11.3414	-17.7923	6.82073	10.3859
-19.6409	-6.06446	-19.3135	-38.0281	-33.2442	-33.0128	45.0559	-57.4644	-13.7622	-18.8507	-64.0606	29.9625	-27.3971	-35.8857	10.9139	14.1699	-15.1783	-7.99989	18.7718	70.5573	-16.1128	-16.8211	36.396	-71.3419	-16.2344	-9.64443	-41.8936	-80.3698	-14.7397	-16.8959	19.2718	32.8819	-18.5307	-17.6982	-74.4949	-69.7039	-17.5547	-15.8303	-68.2193	-60.6924	-23.2962	-14.4639	-30.3286	8.93351	-19.6083	-17.5607	-15.2637	-20.0996	6.05549	9.35986
-18.447	-1.7712	-30.4196	-54.9107	-28.2125	-27.4289	33.1132	-34.2417	-9.67613	-15.6114	-68.5155	35.0222	-23.3729	-30.7465	11.9362	13.0481	-10.7623	-2.3426	13.9803	83.5572	-11.2355	-12.356	10.3645	-78.8406	-13.0971	-5.32727	-41.1455	-82.3222	-9.82881	-13.0084	25.9711	34.3076	-14.9667	-13.651	-75.2995	-70.2943	-13.8664	-12.2452	-57.8493	-70.839	-20.0977	-11.9613	-44.5509	10.1093	-15.7785	-13.3136	-20.2195	-19.5822	6.06629	9.10984
-14.7514	3.32099	-41.7119	-62.6841	-24.2609	-22.8673	13.9466	-19.3814	-4.99765	-12.2189	-73.1466	41.3642	-19.6233	-26.5	13.5247	8.73681	-5.65866	4.64845	2.59207	75.2981	-5.73431	-7.67128	-18.4555	-86.2946	-9.79124	0.00520817	-46.2904	-85.4197	-3.02454	-8.58118	33.871	30.0306	-11.2886	-9.34191	-55.6131	-55.9431	-10.0099	-8.33546	-45.2628	-78.4686	-17.2704	-9.26361	-56.3845	11.067	-11.4919	-8.80045	-24.8119	-20.1541	6.77761	9.64482
-13.0183	9.46646	-52.3913	-51.7856	-20.9112	-18.9252	-6.09658	-25.135	0.56574	-8.29795	-77.7525	46.9938	-15.7515	-22.7066	15.85	1.61778	0.605667	13.1127	-12.4586	54.5693	0.693738	-2.4529	-42.1266	-93.9654	-5.87289	6.7044	-54.1063	-89.719	6.17897	-3.30199	38.0881	20.485	-7.20203	-4.57147	-38.7132	-41.89	-5.46219	-3.65956	-47.1763	-85.0939	-14.3005	-6.0868	-63.9051	10.5094	-6.77041	-3.70172	-30.9808	-23.0376	8.43024	10.8933
-14.613	16.7623	-61.2721	-29.5985	-17.7062	-15.1828	-25.58	-35.7031	7.26225	-3.33514	-81.7108	43.7172	-11.4039	-18.9721	18.9573	-7.86414	8.30566	22.6257	-27.2742	42.6888	8.39877	3.74168	-51.8721	-101.262	-0.897441	14.6351	-62.6799	-94.8661	17.4067	3.17915	34.6786	7.66577	-2.29728	0.900377	-38.1229	-40.3103	0.330978	2.29917	-58.2894	-91.9941	-10.7766	-2.17659	-68.4652	7.61427	-1.45364	2.22517	-38.3301	-27.2647	11.1868	12.6061
-17.5208	24.6259	-68.4204	-21.2915	-14.1955	-11.151	-41.8987	-46.4709	14.9843	3.26275	-84.2796	24.889	-6.23957	-14.9427	22.0647	-19.2836	17.2089	31.9819	-40.1164	27.6537	17.5191	11.4014	-47.0238	-107.171	5.44964	22.7778	-70.9275	-100.533	28.6395	11.0638	23.9906	-5.60353	3.97574	7.41724	-46.0438	-47.4669	7.80613	9.98203	-68.992	-99.6285	-6.40792	2.68968	-72.9038	2.49197	4.65632	9.00989	-44.9592	-35.6739	14.506	14.2398
-9.30485	31.6619	-74.2289	-26.5882	-9.85596	-6.17896	-57.4707	-57.7794	22.8804	11.8114	-85.2668	-5.5553	0.126831	-10.2436	23.2241	-31.7855	26.1591	39.6312	-50.558	6.41341	27.3337	20.5869	-42.6253	-111.525	13.133	29.6328	-78.4278	-106.493	37.3054	19.9134	9.21599	-16.3478	11.8702	15.1618	-56.2193	-58.0101	16.8637	19.2559	-76.7198	-107.888	-1.02265	8.59276	-78.7403	-4.37274	12.3172	16.3478	-51.6197	-47.2665	15.6855	15.1293
20.0457	36.5714	-79.3037	-35.7212	-4.00787	0.535602	-48.8557	-68.8076	29.56	21.6399	-85.0837	-37.3556	8.09482	-4.40631	20.6845	-43.3702	33.412	44.6034	-58.8501	-3.43342	36.2491	30.3433	-47.3567	-115.009	21.409	34.2562	-85.1294	-112.371	42.2432	28.4176	-5.22787	-22.2876	20.5818	23.5551	-66.5671	-69.3833	26.3749	28.8563	-82.3463	-116.475	5.38702	15.23	-86.1353	-12.9329	21.7591	23.6002	-56.7429	-57.9224	14.038	14.8643
41.8731	38.9927	-84.1586	-46.1138	4.05765	9.59559	-27.209	-79.0411	33.9975	30.9627	-84.1356	-40.185	17.627	3.12351	14.126	-51.3238	37.8484	46.8733	-65.5741	-1.50965	42.9138	39.0481	-57.7445	-118.237	28.8545	36.6658	-90.9304	-117.366	43.8756	35.0652	-15.2184	-23.7552	28.3829	31.1768	-76.026	-80.2288	34.5587	36.9149	-86.969	-125.057	12.4832	21.734	-94.8986	-23.7224	29.6793	30.0139	-60.7944	-64.2309	13.1695	13.3217
45.236	39.3667	-89.1518	-56.8767	14.4142	20.547	-26.2885	-88.1531	36.1195	38.0603	-82.5247	-25.5802	27.594	12.6948	4.07478	-54.5792	39.5672	47.0001	-71.4553	-3.15911	46.9797	45.5252	-70.7047	-121.573	34.2525	37.461	-95.4784	-120.235	43.2394	39.0611	-19.464	-24.7837	33.9232	36.6865	-84.414	-90.134	40.2278	42.3023	-91.4144	-133.133	19.4205	26.9747	-104.46	-37.0377	34.634	35.0618	-66.4801	-68.6586	10.4269	10.6429
38.2069	38.4145	-94.4099	-67.1862	25.6028	31.4225	-35.9898	-96.1312	36.5661	42.3164	-80.4584	-28.7399	36.1657	23.7433	-8.70167	-55.1612	39.3548	45.7008	-77.1614	-8.70871	48.8187	49.4871	-85.151	-125.324	37.316	37.3387	-98.3739	-119.639	41.4086	40.5085	-20.8927	-28.8739	36.9731	39.6285	-91.9202	-99.2122	43.319	45.0463	-96.4568	-139.997	25.1448	30.1969	-113.828	-51.5327	37.1706	38.5276	-73.0312	-74.5914	6.90764	7.57254
31.4202	36.7861	-99.7826	-76.6183	35.2078	40.0333	-45.3258	-103.055	36.1456	44.054	-78.5429	-42.5571	42.1555	34.5183	-22.2611	-56.4015	37.9879	43.6459	-83.0795	-25.2611	49.0084	51.1908	-99.8172	-129.633	38.4864	36.8233	-99.544	-115.053	39.3289	40.0399	-23.3753	-36.0587	38.0068	40.3394	-98.5404	-107.674	44.3907	45.7642	-102.493	-144.978	28.9944	31.3379	-122.274	-64.0866	38.2848	40.4121	-79.5487	-81.9433	5.62171	5.58516
30.4002	34.9141	-104.885	-85.1241	41.7099	45.5024	-55.9428	-108.997	35.4474	43.9508	-77.2953	-57.269	45.5693	43.2175	-33.7524	-60.3286	35.9796	41.3818	-89.2748	-48.6962	48.0748	51.0889	-113.165	-134.483	38.3945	36.207	-99.4103	-108.156	37.6626	38.4578	-28.2104	-45.1773	37.6386	39.4864	-103.574	-115.474	44.0858	45.1656	-108.74	-147.556	30.9239	30.8659	-129.582	-72.4336	38.717	40.9307	-85.8029	-89.4269	5.68127	5.69731
28.1483	33.0207	-109.243	-92.8603	45.0889	48.1827	-67.0156	-114.095	34.7136	42.714	-76.6808	-74.2507	47.0775	49.1605	-42.2449	-67.0979	33.6369	39.3093	-95.6123	-65.7928	46.427	49.682	-123.83	-139.905	37.5609	35.5953	-98.5413	-101.713	36.6455	36.519	-34.9634	-55.6338	36.417	37.752	-105.878	-122.227	42.9545	43.8729	-112.404	-147.272	31.2873	29.4286	-135.64	-77.4085	38.1779	40.4761	-91.0957	-96.2052	6.35887	6.79705
26.8832	31.2073	-112.384	-99.964	46.0847	48.8488	-78.4381	-118.621	33.9336	40.9645	-76.3467	-90.9247	47.3923	52.615	-49.3452	-75.9187	31.177	37.6756	-101.824	-78.6161	44.3865	47.4637	-131.36	-146.018	36.3635	34.9985	-97.1394	-96.9969	36.1525	34.8078	-43.1755	-67.0495	34.7827	35.7007	-104.861	-127.297	41.4645	42.3415	-111.145	-143.783	30.5801	27.6021	-140.273	-81.7415	37.2001	39.475	-95.1175	-102.448	6.76387	7.76794
29.0038	29.5415	-113.909	-106.456	45.583	48.2446	-89.4571	-122.838	32.9937	39.1461	-75.9571	-105.598	46.9811	54.1208	-57.0108	-85.9611	28.8349	36.5457	-107.53	-86.0689	42.2373	44.9068	-136.169	-152.704	35.084	34.4043	-95.0964	-93.836	35.8971	33.6332	-52.5159	-78.8029	33.0494	33.7438	-101.053	-130.006	40.0191	40.832	-106.172	-137.009	29.2892	25.7954	-143.458	-87.5587	36.2702	38.2649	-98.0297	-107.894	6.5619	8.32961
30.6897	28.0849	-113.594	-112.228	44.3627	46.9414	-99.2326	-126.81	31.7638	37.4411	-75.4026	-117.471	46.0714	54.2074	-66.1856	-96.6427	26.8968	35.8004	-112.339	-91.7895	40.2385	42.4151	-139	-159.401	33.9268	33.7927	-92.3785	-91.9658	35.6057	32.9803	-62.5384	-90.0603	31.4144	32.131	-95.7301	-129.99	38.8979	39.4604	-99.9932	-127.474	27.7996	24.2496	-145.46	-95.5452	35.2425	37.0458	-100.169	-112.671	6.42775	8.5095
31.5507	26.8557	-111.512	-117.074	42.9468	45.3216	-107.259	-130.43	30.184	35.7867	-74.8603	-126.547	44.7775	53.3536	-76.7658	-107.448	25.5961	35.2139	-115.985	-106.034	38.5675	40.2354	-140.45	-165.436	32.9948	33.1421	-89.1115	-91.2118	35.1291	32.6214	-72.6588	-100.112	30.0036	30.9521	-90.1498	-127.448	38.1827	38.268	-93.8647	-117.056	26.3548	23.0677	-146.782	-105.43	34.208	35.8926	-101.764	-117.657	6.34013	8.41182
30.1012	25.8023	-108.09	-120.812	41.5517	43.6022	-113.645	-133.524	28.3185	34.0163	-74.5762	-133.016	43.1794	51.9329	-88.1074	-117.755	24.9953	34.5864	-118.346	-120.935	37.2432	38.4419	-140.804	-170.398	32.2647	32.44	-85.4448	-91.5207	34.4434	32.3178	-82.2391	-108.609	28.8895	30.1769	-85.0417	-122.927	37.7899	37.2562	-88.6012	-108.285	25.0818	22.2264	-148.007	-116.44	33.078	34.8	-102.991	-122.202	6.2789	8.14328
26.9678	24.8423	-103.979	-123.377	40.1825	41.874	-118.871	-135.871	26.3056	32.0304	-74.612	-136.941	41.3518	50.1685	-99.6119	-126.923	24.9877	33.8491	-119.392	-128.224	36.1463	37.0007	-140.248	-174.015	31.6343	31.6747	-81.4631	-93.0458	33.598	31.9333	-90.7038	-115.606	28.0827	29.7183	-80.5638	-116.996	37.5836	36.4037	-84.9489	-102.315	24.0277	21.6019	-149.63	-127.595	31.8971	33.7361	-104.002	-125.537	6.25439	7.79053
25.1957	23.9104	-99.8021	-124.776	38.7698	40.1677	-123.372	-137.192	24.2919	29.875	-74.6891	-138.165	39.3874	48.1543	-110.811	-134.513	25.38	33.0409	-119.172	-135.215	35.1318	35.8234	-139.162	-175.834	31.0024	30.8084	-77.2469	-95.5323	32.6768	31.4397	-97.7094	-121.487	27.531	29.4805	-76.4403	-110.224	37.4462	35.6676	-83.1406	-98.9458	23.1824	21.0652	-151.966	-138.03	30.9087	32.6757	-104.865	-128.174	6.12768	7.41222
25.3527	22.9678	-95.9475	-125.017	37.2476	38.5134	-127.329	-137.199	22.3948	27.6868	-74.3832	-136.645	37.3845	45.9059	-121.022	-140.404	25.9732	32.2118	-117.84	-144.573	34.0995	34.7851	-138.174	-175.276	30.3077	29.7833	-72.8667	-98.1001	31.7349	30.8715	-103.233	-126.714	27.1259	29.3703	-72.1735	-103.184	37.2676	34.9764	-82.8523	-97.66	22.4949	20.5661	-155.107	-147.205	30.1258	31.6035	-105.539	-130.18	5.82971	7.03385
25.6575	22.0025	-92.5131	-124.105	35.5883	36.945	-130.687	-135.654	20.6658	25.5862	-73.5288	-133.048	35.4212	43.4164	-129.322	-144.734	26.6109	31.3778	-115.639	-152.492	32.9928	33.7411	-137.991	-171.98	29.5062	28.5849	-68.2468	-99.8752	30.7616	30.2694	-107.491	-131.545	26.7428	29.2962	-67.3528	-96.254	36.9216	34.258	-83.5244	-97.5255	21.8796	20.107	-158.739	-154.924	29.3407	30.5077	-105.912	-131.103	5.5457	6.65814
24.8665	21.0327	-89.3563	-122.05	33.8085	35.4735	-133.202	-132.402	19.0858	23.6323	-72.2144	-128.714	33.544	40.7009	-135.065	-147.713	27.1958	30.5261	-112.809	-160.163	31.7886	32.5684	-139.152	-165.903	28.5356	27.2792	-63.2314	-100.246	29.7295	29.6432	-110.759	-135.989	26.2928	29.1811	-61.8331	-89.5253	36.2895	33.4804	-84.6737	-97.469	21.2431	19.6802	-162.035	-161.21	28.3981	29.3816	-105.848	-131.035	5.36261	6.28418
24.2988	20.0964	-86.1623	-118.879	31.9449	34.0651	-134.484	-127.411	17.6261	21.8545	-70.4367	-124.98	31.7597	37.8218	-138.288	-149.412	27.7029	29.6479	-109.404	-171.228	30.4944	31.2083	-141.727	-157.269	27.3444	25.9762	-57.7399	-98.5235	28.6603	28.9616	-113.221	-139.919	25.7381	28.9641	-55.7272	-82.9071	35.3381	32.6672	-85.7317	-96.9884	20.5278	19.2563	-164.071	-166.183	27.4032	28.229	-105.181	-130.336	5.1872	5.91697
23.3009	19.2257	-82.4936	-114.627	30.0353	32.6571	-134.08	-120.836	16.3043	20.2925	-67.8974	-122.502	30.039	34.9073	-139.406	-149.622	28.2059	28.7895	-105.266	-181.041	29.139	29.6726	-145.063	-146.669	25.9604	24.7726	-51.8065	-93.9202	27.6353	28.1827	-114.908	-143.15	25.0647	28.5959	-49.3278	-76.2485	34.1834	31.8725	-85.8923	-96.0661	19.6969	18.8185	-164.519	-170.059	26.3241	27.0715	-103.696	-128.613	5.07643	5.56627
21.6561	18.4169	-77.9173	-109.264	28.1371	31.1987	-131.59	-113.036	15.1655	18.9878	-64.1857	-120.929	28.3498	32.1522	-138.636	-147.851	28.8964	28.0624	-100.191	-181.616	27.7816	28.0125	-147.844	-134.908	24.5069	23.7018	-45.5958	-86.2199	26.801	27.3062	-115.725	-145.421	24.2474	28.0517	-42.9859	-69.4545	33.0724	31.1393	-84.3322	-94.63	18.7187	18.4006	-163.76	-173.113	25.2121	25.9482	-101.16	-125.131	5.09959	5.2458
20.5102	17.6084	-72.2172	-102.69	26.3463	29.6753	-126.824	-104.446	14.2325	17.9371	-59.1011	-119.107	26.7012	29.7759	-135.868	-143.522	30.098	27.5966	-94.0294	-177.859	26.5145	26.2905	-148.457	-122.78	23.1187	22.7305	-39.3549	-76.1837	26.4345	26.3948	-115.463	-146.398	23.2634	27.3573	-37.0016	-62.565	32.2991	30.5081	-80.5348	-92.3344	17.6084	18.0544	-162.298	-175.463	24.2843	24.9026	-97.3771	-120.304	5.29129	4.98723
18.8909	16.698	-65.5136	-94.8665	24.7537	28.1129	-119.912	-95.4551	13.4818	17.0421	-52.898	-115.696	25.1644	27.9609	-130.914	-136.333	32.2807	27.531	-86.7635	-172.316	25.5413	24.5885	-145.451	-110.902	21.8386	21.8266	-33.3226	-65.032	26.9605	25.5868	-113.836	-145.724	22.1536	26.6168	-31.5503	-55.7005	32.1167	30.0786	-74.4355	-88.5854	16.4391	17.7693	-159.878	-176.93	23.6019	23.9829	-92.2249	-114.322	5.89708	4.86834
19.1936	15.5539	-58.1892	-86.005	23.3612	26.5815	-111.316	-86.3532	12.8548	16.1107	-46.215	-109.952	23.8597	26.8073	-123.817	-126.579	35.9593	28.0745	-78.598	-162.385	25.4323	23.0585	-138.105	-99.5031	20.6315	21.0503	-27.7464	-54.0849	28.8217	25.1359	-110.633	-143.059	21.0772	26.0698	-26.6163	-48.9748	32.6953	30.0663	-66.2269	-82.7724	15.3029	17.4761	-154.65	-177.07	23.5627	23.2713	-85.6467	-106.976	6.96495	5.03395
20.0775	14.1728	-50.7181	-76.5703	22.0777	25.2809	-101.705	-77.3134	12.2668	14.9007	-39.6154	-102.4	22.9416	26.2874	-115.018	-115.224	41.3248	29.5445	-69.9586	-157.582	29.2048	22.0447	-127.263	-88.6963	19.4772	20.7354	-22.9022	-44.5464	32.2395	25.5235	-105.868	-138.181	20.4019	26.1843	-22.0148	-42.5099	34.1125	30.8083	-56.4105	-74.7624	14.2752	17.1141	-143.5	-175.251	24.4	22.9633	-77.7249	-99.367	8.84011	5.66131
18.7462	12.7703	-43.5264	-67.0513	20.8455	24.859	-91.7187	-68.4198	11.5956	13.1736	-33.4262	-94.4678	22.6107	26.1698	-105.31	-103.619	47.7006	32.3669	-61.3744	-153.639	42.0536	22.4597	-115.438	-78.7018	18.4415	22.2164	-18.9498	-36.8717	36.7035	27.707	-99.8391	-131.195	20.934	27.7521	-17.5322	-36.419	36.2981	32.6616	-46.0438	-65.1634	13.39	16.6399	-126.036	-170.698	26.3017	23.5251	-69.0177	-91.4768	12.1992	6.91995
17.832	14.2402	-36.9226	-57.7571	19.915	27.9745	-81.7913	-59.7362	10.677	10.7418	-27.8943	-87.5019	23.1118	25.9606	-95.5485	-92.8421	53.4184	36.9656	-53.3028	-139.178	58.2485	27.0112	-104.971	-69.75	17.7663	28.6157	-15.8611	-30.7577	40.4179	33.119	-93.054	-122.717	24.3223	31.7365	-13.0365	-30.6864	38.8875	35.7176	-36.3859	-55.1799	12.6339	16.03	-108.09	-162.725	28.8392	26.1921	-60.6234	-82.621	16.3498	8.83249
16.6447	26.2458	-31.0947	-48.85	20.5352	38.7806	-72.1348	-51.3822	9.26567	7.4637	-23.1763	-82.2195	24.617	24.9731	-86.2596	-83.3035	56.6556	43.1543	-45.9903	-119.715	62.5247	38.9186	-96.3822	-61.9935	18.11	40.0387	-13.5273	-25.7297	40.8424	41.7583	-86.0291	-113.78	32.6163	38.0863	-8.49451	-25.1169	41.0579	39.3018	-28.2395	-46.0577	11.9914	15.3952	-94.7681	-151.275	30.4419	32.1924	-53.2815	-73.5838	17.9037	11.9511
16.1311	43.4524	-26.1067	-40.4462	26.5374	52.3263	-62.8578	-43.5477	6.93314	3.1752	-19.3131	-78.3644	26.9226	22.5675	-77.5015	-74.8295	56.4102	49.1935	-39.4603	-99.8024	55.3627	52.9803	-88.8494	-55.2451	21.3186	47.1214	-11.8819	-21.5877	36.1609	49.3322	-79.0787	-105.334	44.4028	44.153	-3.9961	-19.5074	41.5608	41.69	-21.7562	-38.3293	11.5894	15.2664	-84.981	-137.372	31.2118	38.2962	-46.8893	-64.9423	16.923	16.7766
22.8761	45.2545	-21.9116	-32.6542	40.5468	55.2477	-54.0713	-36.4265	3.01365	-2.36338	-16.3008	-75.075	29.0387	18.3558	-69.0495	-66.9079	52.4876	52.1279	-33.5843	-83.4172	41.8226	57.3531	-81.184	-48.7291	30.481	42.722	-10.9055	-18.383	25.8348	50.3675	-72.236	-97.721	52.5599	46.241	0.214967	-13.8611	39.1052	40.7528	-16.7332	-31.8105	12.0991	17.0966	-76.2666	-122.574	31.8059	38.4687	-41.0934	-57.0509	15.5905	19.0385
40.1498	34.2769	-18.4117	-25.5946	52.2954	47.107	-45.8969	-30.1851	-3.23802	-9.41439	-13.9577	-71.3091	29.1799	12.1515	-60.6242	-58.9611	44.9339	49.6477	-28.151	-70.8188	23.1359	50.9757	-72.3278	-41.1984	43.6935	29.207	-10.5001	-16.1403	10.4063	43.6058	-65.3225	-90.6434	52.5116	42.9506	3.83891	-8.41459	32.8788	35.0784	-12.8481	-26.1508	15.7472	22.2868	-67.0148	-107.716	31.0631	32.5339	-35.5651	-49.7393	18.0357	18.377
51.7044	18.6235	-15.4686	-19.3944	50.0282	32.7741	-38.4343	-24.9582	-12.1816	-18.0711	-11.8495	-66.1605	25.6308	3.83101	-52.0417	-50.6308	33.6299	40.811	-22.9061	-62.6677	0.730541	37.2288	-61.6373	-31.5798	49.7898	9.72946	-10.4381	-14.8345	-8.3817	30.2316	-58.1083	-83.5123	45.1281	34.7857	6.67133	-3.52009	22.8595	24.3951	-9.75982	-21.1034	24.2405	27.4733	-56.505	-92.7209	25.7435	21.983	-30.0434	-42.8257	23.4925	17.5116
46.8204	-0.0542877	-12.8739	-14.1526	36.298	14.5126	-31.7777	-20.7694	-23.2651	-28.0128	-9.58764	-59.2239	17.9015	-6.60093	-43.3648	-41.9522	18.2948	25.5361	-17.5985	-57.4009	-22.692	17.8594	-49.2278	-19.8877	43.8438	-12.8482	-10.448	-14.4088	-27.685	11.8883	-50.4955	-75.8002	31.7331	22.5548	8.61985	0.484823	9.96583	9.44131	-7.1242	-16.51	30.1621	25.5529	-44.8456	-77.4047	14.6707	7.2572	-24.4294	-36.0932	27.4924	17.2854
31.7867	-19.9565	-10.4228	-9.90836	14.947	-5.8334	-26.0171	-17.4637	-35.0601	-38.4277	-7.10647	-50.8197	7.2924	-18.7176	-34.9723	-33.3377	-0.909392	4.63734	-12.0478	-52.7418	-43.6741	-5.21551	-36.2374	-7.79257	28.7742	-34.6387	-10.238	-14.6098	-44.6074	-9.07795	-42.6697	-67.2947	13.1803	7.14483	9.7152	3.40159	-3.83874	-8.09106	-4.55609	-12.3408	23.8622	15.2795	-32.9878	-62.1039	-0.749731	-10.2633	-18.8673	-29.5465	28.2735	16.678
14.3945	-38.6452	-7.96906	-6.61129	-10.8823	-26.056	-21.155	-14.7621	-45.9337	-48.1807	-4.49177	-41.971	-3.50369	-31.447	-27.4157	-25.4243	-22.4152	-19.5598	-6.18778	-45.5307	-59.7315	-28.8126	-24.5451	2.12924	7.40478	-51.6351	-9.46879	-14.7892	-57.3503	-29.6478	-35.1478	-58.3289	-8.91976	-10.1909	10.1591	5.28363	-15.8927	-25.8644	-1.81161	-8.53558	8.03545	0.14967	-22.3821	-47.8651	-17.7086	-28.1718	-13.6742	-23.3096	26.0944	15.1105
-3.19174	-53.7621	-5.36981	-4.12257	-36.6721	-43.8455	-17.0661	-12.378	-54.5573	-55.9911	-1.6821	-34.0382	-11.5395	-43.1727	-21.1904	-18.8897	-43.1385	-42.9807	-0.0606641	-41.1636	-70.301	-49.1305	-15.9178	7.97982	-17.0024	-62.1602	-7.81658	-13.9734	-65.3503	-47.0667	-28.66	-49.8458	-31.1792	-27.6783	10.2714	6.46176	-23.6747	-41.726	1.07751	-4.85762	-10.8289	-15.9669	-14.3102	-36.1163	-33.4032	-43.9528	-9.1568	-18.2676	22.8122	12.8987
[truncated: 2 more columns]

## Sheet: crptf
SUB1				SUB2				SUB3				SUB4				SUB5				SUB6				SUB7				SUB8				SUB9				SUB10				SUB11				MEAN				SD
gait	gait_sleeve	onehop	onehop_sleeve	gait	gait_sleeve	onehop	onehop_sleeve	gait	gait_sleeve	onehop	onehop_sleeve	gait	gait_sleeve	onehop	onehop_sleeve	gait	gait_sleeve	onehop	onehop_sleeve	gait	gait_sleeve	onehop	onehop_sleeve	gait	gait_sleeve	onehop	onehop_sleeve	gait	gait_sleeve	onehop	onehop_sleeve	gait	gait_sleeve	onehop	onehop_sleeve	gait	gait_sleeve	onehop	onehop_sleeve	gait	gait_sleeve	onehop	onehop_sleeve	gait	gait_sleeve	onehop	onehop_sleeve	gait	gait_sleeve
-52.7152	-66.8208	-1.94293	6.84974	-54.8328	-52.7418	33.0129	40.5824	-45.4083	-40.4979	25.504	-16.3124	-38.7834	-40.3025	22.2659	17.4945	-55.7959	-57.7156	-8.88044	-32.832	-59.2236	-65.6857	-0.144774	-4.66793	-62.28	-52.4511	-9.79662	-8.89675	-56.0773	-49.0084	31.184	22.9041	-59.8146	-53.6478	-3.76231	-5.05499	-45.8699	-58.27	-7.83002	1.67526	-25.6109	-23.4262	9.57055	6.01374	-50.5829	-50.9607	8.1073	2.52325	10.9018	12.5103
-54.132	-66.3675	0.085649	4.69218	-60.6068	-59.2499	31.9198	39.3239	-44.7771	-40.5133	34.9911	-2.98518	-39.2325	-40.2322	24.3916	19.6718	-59.4682	-59.6305	-10.4896	-38.2926	-63.978	-69.0399	0.00731583	-9.73473	-65.9974	-59.3466	-4.3535	5.65385	-59.5283	-52.5666	32.4522	23.4582	-65.686	-56.4106	-2.8709	-5.12784	-46.0429	-61.6126	-6.55088	1.63429	-26.5676	-19.2004	11.8023	6.74798	-53.2743	-53.1064	10.1259	4.09472	12.6388	14.5138
-42.8746	-51.2917	5.64654	1.67176	-64.1541	-63.0255	31.1694	38.8002	-40.5933	-38.056	43.047	21.5464	-40.7014	-39.3647	26.5743	21.8127	-60.9221	-59.4713	-9.62775	-35.0029	-67.2305	-69.5983	0.799139	-11.8136	-66.497	-63.6661	9.15245	23.3382	-60.1192	-53.7381	33.3404	23.1976	-68.6588	-56.4589	-1.20929	-5.71089	-45.0596	-62.8658	-3.99146	2.69101	-24.4838	-14.1888	15.0038	7.7001	-52.845	-51.975	13.6277	8.02096	14.6677	15.9638
-21.7569	-25.2936	14.8708	4.33646	-66.289	-62.9268	31.8515	40.1079	-32.5865	-33.0252	46.5125	39.0791	-41.9147	-37.8152	28.3614	23.7179	-60.6982	-57.0018	-7.27453	-34.5241	-67.9878	-66.0628	4.68924	-8.5049	-62.2596	-64.5082	27.7981	31.2433	-57.1273	-51.2761	33.8915	22.3477	-68.0816	-53.7733	1.46638	-6.49826	-41.6864	-61.9169	0.435491	5.27087	-19.7524	-10.5218	18.8579	8.73914	-49.1037	-47.6474	18.3146	11.3923	18.3653	18.4043
-11.4512	-11.8046	22.4599	19.4729	-44.7659	-55.8898	34.6329	42.9796	-23.9365	-26.9516	45.5947	43.6899	-41.8825	-35.9973	29.6351	25.006	-58.8919	-51.4354	-3.94248	-31.5853	-64.0368	-55.6242	13.104	-0.46922	-52.095	-60.747	38.4896	32.0378	-49.9349	-44.4586	34.2864	21.215	-62.9773	-48.6091	4.64234	-7.42878	-35.3559	-58.4719	6.17058	9.11471	-14.3017	-9.46122	22.6443	9.86491	-41.7845	-41.7682	22.5198	14.8998	18.5846	18.3644
-10.7473	-9.72419	25.327	30.7086	-12.0566	-40.2891	39.0247	45.8258	-18.6608	-22.1098	41.6637	42.6192	-40.4715	-34.6668	30.5922	25.1688	-54.861	-42.0417	0.498247	-24.9994	-52.6484	-39.162	21.2382	10.3213	-39.5945	-52.5368	39.8207	29.7938	-39.8268	-34.8574	34.6651	20.0386	-53.2387	-42.0484	7.35077	-8.62924	-26.7959	-52.373	12.2032	14.1349	-10.4	-11.3223	25.5908	11.1609	-32.6638	-34.6483	25.2704	17.8312	17.6265	14.5546
-8.80604	-11.2462	24.9348	30.5992	-6.8594	-25.4061	43.5791	47.2561	-17.935	-19.8249	36.2007	37.7681	-38.2685	-34.4898	31.3481	23.8203	-47.5582	-30.1541	6.23196	-13.7937	-38.0106	-26.4252	24.4881	19.1181	-31.0101	-43.2014	37.1783	25.3663	-30.7954	-26.1951	35.038	18.8976	-41.6005	-35.9001	8.71829	-10.1042	-18.1568	-44.3216	17.9705	20.7837	-9.05132	-15.7669	27.2019	12.6997	-26.1865	-28.4483	26.6263	19.3101	14.5823	10.555
-13.6755	-14.9766	22.7757	29.694	-9.76243	-19.3163	47.0489	46.9537	-21.0848	-20.2639	30.6592	30.0755	-36.0099	-35.5841	31.6557	21.022	-37.2084	-20.0058	12.4367	-5.60144	-29.1867	-22.3934	24.1611	21.9085	-27.9636	-36.8681	32.1182	19.3529	-26.3081	-21.2262	35.284	17.7995	-32.2668	-31.6936	8.37109	-11.9414	-12.0264	-36.3281	24.0208	27.0534	-10.2054	-22.0226	27.3139	14.4156	-23.2453	-25.5162	26.895	19.1575	10.3932	7.95688
-19.1276	-20.7515	19.558	28.4766	-14.2746	-19.4242	48.9468	45.2267	-27.0493	-23.09	26.1933	21.3497	-34.4395	-37.6051	31.0828	17.3454	-27.5394	-15.054	17.4681	-1.59373	-27.3656	-24.0912	22.0698	19.7496	-28.9432	-34.7256	25.2397	12.9368	-26.8919	-20.4931	35.1862	16.7377	-27.366	-30.0644	13.1276	-6.52762	-9.87725	-30.7217	30.4271	29.4889	-13.6151	-29.1565	25.8932	16.0418	-23.3172	-25.9252	26.8357	18.112	7.78947	7.01833
-26.9401	-28.1361	15.7633	26.4141	-20.5568	-22.5189	49.1678	42.4088	-34.5487	-27.7545	23.1279	13.6521	-34.4546	-40.1841	29.3528	13.9088	-22.892	-15.5471	20.4313	-1.8717	-29.567	-28.8762	18.8644	15.5317	-32.7033	-35.8481	17.5732	7.66118	-31.2655	-23.375	34.5503	15.644	-26.9595	-30.9905	19.6557	7.85378	-11.5848	-28.6968	34.4121	28.2504	-18.9082	-36.3021	22.9298	17.1377	-26.3982	-28.9299	25.9844	16.9628	7.26213	6.97307
-38.0263	-36.4176	11.7724	23.6704	-28.0675	-27.4253	47.7039	38.6813	-42.2275	-33.5385	20.7866	8.43452	-36.8088	-43.1923	26.5754	11.5487	-23.8148	-20.023	21.5466	-5.95695	-34.0122	-35.3896	15.0308	11.0148	-38.4293	-39.16	10.5248	4.52124	-37.7773	-28.8094	33.3557	14.4427	-30.4238	-34.1356	18.5182	17.447	-16.0778	-30.161	34.1991	25.7791	-25.3657	-42.8037	18.6093	17.209	-31.9119	-33.7324	23.5112	15.1629	7.90693	6.90009
-43.2482	-44.7843	7.86376	20.3106	-36.0864	-33.5028	44.7014	34.2008	-49.0881	-39.6915	18.3793	6.10101	-41.451	-46.653	23.349	10.1778	-28.3295	-26.8422	21.2573	-7.46714	-39.6728	-42.5266	11.1032	7.13069	-45.1281	-43.8738	5.35149	3.3816	-44.971	-35.5434	31.781	13.1857	-36.7174	-38.9628	13.9927	19.5687	-22.125	-34.3188	31.5642	23.5133	-32.1191	-48.3029	13.4483	15.9443	-38.0851	-39.5456	20.2538	13.277	8.06195	6.51046
-45.8688	-52.5594	4.16473	16.6061	-43.8247	-40.2118	40.4918	29.2312	-54.7368	-45.632	15.8399	6.14971	-47.4827	-50.5278	19.3941	9.4787	-34.4626	-34.6699	19.766	-9.83691	-45.7445	-49.4792	7.5513	4.45343	-51.6966	-49.2865	2.54607	3.4135	-51.783	-42.4093	30.0881	12.0539	-44.4266	-44.7749	11.1444	20.6087	-28.8016	-40.0946	28.6328	21.8534	-38.5498	-52.734	8.1434	13.3982	-44.307	-45.6708	17.0693	11.5827	7.77555	5.84692
-52.0227	-59.3175	0.581411	12.8857	-50.8866	-47.0341	35.4898	24.0485	-59.2738	-51.0386	13.4351	7.62725	-53.8499	-54.631	14.601	9.14116	-40.9219	-42.5462	17.1415	-14.1531	-51.7046	-55.8838	4.58561	3.11832	-57.379	-54.7353	1.83427	3.63235	-57.6258	-48.6083	28.4968	10.9712	-52.1939	-50.863	10.865	21.4052	-35.6316	-46.4054	26.4743	20.6911	-44.3671	-56.2468	3.28576	9.94911	-50.5324	-51.5736	14.2537	9.9379	7.37223	5.08061
-56.8969	-64.9204	-3.19235	9.36946	-57.1189	-53.5019	30.0832	18.8498	-63.0331	-55.8065	11.2433	9.63071	-59.8686	-58.7218	11.1007	8.7686	-47.0228	-49.8565	13.5089	-18.3936	-57.3018	-61.6917	2.04448	2.87156	-61.9331	-59.7272	2.5301	3.09113	-62.4098	-53.8223	27.1286	10.4875	-59.1396	-56.7063	12.9223	20.8446	-42.4413	-52.4076	25.1959	19.782	-49.4534	-59.0992	-0.834241	6.07282	-56.0563	-56.9329	11.9755	8.30677	6.79394	4.42119
-60.7138	-69.4581	-7.53435	6.02508	-62.4734	-59.2709	24.6491	13.8622	-66.3489	-59.9751	9.37256	11.3953	-65.2345	-62.6338	9.36975	8.05028	-52.4948	-56.2943	9.16636	-23.9121	-62.4313	-66.9083	-0.489049	3.32167	-65.504	-64.025	3.82627	1.09348	-66.4065	-58.1068	26.0079	7.84456	-64.9437	-62.0439	15.7868	18.3228	-49.0695	-57.659	24.2927	19.1116	-53.8045	-61.5503	-4.30343	2.17853	-60.8568	-61.6296	10.0131	6.11758	6.18171	4.01267
-65.5243	-73.1413	-12.7756	2.63315	-66.9327	-64.1651	19.6229	9.34058	-69.4509	-63.6715	7.99211	12.4272	-69.8593	-66.3028	7.73928	6.8551	-57.2997	-61.781	4.56361	-27.7349	-67.05	-71.5135	-3.47964	3.87764	-68.4596	-67.64	4.98738	-2.70385	-69.963	-61.6916	25.079	2.20496	-69.6852	-66.8137	17.3372	13.7385	-55.222	-62.1034	23.2863	18.9611	-57.5222	-63.7852	-7.48931	-1.42859	-65.179	-65.6917	7.89666	3.47007	5.66265	3.8605
-68.6039	-76.2234	-19.2028	-1.12399	-70.5386	-68.1942	15.3981	5.35841	-72.4702	-67.0503	7.0139	12.8302	-73.7782	-69.7162	5.8081	5.18702	-61.5362	-66.4103	0.178702	-27.4816	-71.1814	-75.5472	-7.23368	3.79401	-71.1747	-70.7949	5.44948	-8.3478	-73.2927	-64.8317	24.2511	6.81567	-73.6495	-71.0723	16.3418	7.7054	-60.5713	-65.9156	22.1276	19.5609	-60.7609	-65.9071	-10.7752	-4.58679	-68.8689	-69.2421	5.39611	1.79195	5.30448	3.87349
-70.6904	-78.9609	-26.9998	-5.68168	-73.4429	-71.5222	12.1052	1.71222	-75.4613	-70.228	5.96423	13.1437	-77.1124	-72.8844	3.8742	3.10132	-65.3651	-70.4046	-3.62994	-28.7847	-74.9034	-79.1243	-11.7712	2.64058	-73.8342	-73.8283	4.78585	-15.4754	-76.4495	-67.7404	23.4833	18.1433	-77.1645	-74.9381	12.7643	0.965153	-64.9544	-69.3412	21.0696	20.6362	-63.684	-67.9825	-14.406	-7.33148	-72.0966	-72.4504	2.47633	0.279025	5.12732	3.96236
-73.4299	-81.5643	-36.054	-11.5456	-75.8986	-74.3829	9.54649	-1.96806	-78.4291	-73.2589	4.54142	13.8969	-80.0292	-75.8466	2.14362	0.57757	-68.934	-74.0021	-6.835	-34.6133	-78.307	-82.3719	-16.8965	0.397996	-76.4474	-76.9841	2.68668	-23.4433	-79.4332	-70.5696	22.837	21.2905	-80.4862	-78.5411	7.27247	-6.07452	-68.4888	-72.5826	20.2698	21.4105	-66.4286	-70.0805	-18.5046	-9.87396	-75.1193	-75.4713	-0.817518	-2.72229	5.05581	4.07756
-77.6292	-84.1616	-45.7965	-19.1027	-78.1812	-77.0156	7.34898	-6.08062	-81.3729	-76.1675	1.85918	15.3663	-82.6944	-78.6649	0.882035	-2.57759	-72.351	-77.3881	-9.78833	-35.0923	-81.4734	-85.4079	-22.407	-2.84558	-79.011	-80.2499	-0.945459	-31.6219	-82.3067	-73.4096	22.4379	17.3268	-83.7701	-81.98	0.455191	-13.4231	-71.4872	-75.7281	19.6211	21.1973	-69.0588	-72.2611	-23.028	-12.4394	-78.1214	-78.4031	-4.48735	-6.29935	5.02617	4.19845
-82.8388	-86.8085	-55.2409	-28.3781	-80.5019	-79.6272	5.15031	-10.9735	-84.2931	-78.9889	-2.80126	17.3863	-85.2381	-81.397	0.16007	-6.72594	-75.6875	-80.7121	-12.962	-34.5665	-84.4858	-88.3534	-28.2099	-7.10142	-81.5929	-83.4511	-5.98366	-39.2261	-85.1935	-76.3105	22.3898	7.18982	-87.0843	-85.3098	-7.70283	-21.3298	-74.254	-78.7741	19.114	19.654	-71.5705	-74.563	-27.6716	-15.1102	-81.1582	-81.2996	-8.52345	-10.8347	5.11773	4.31225
-87.0233	-89.5161	-63.2564	-38.8322	-82.9629	-82.3448	2.65874	-16.9061	-87.1649	-81.7827	-7.75232	19.662	-87.7168	-84.0868	-0.251485	-12.3249	-78.97	-84.0597	-16.7036	-41.0372	-87.4338	-91.3297	-34.2808	-12.3808	-84.2874	-86.4752	-12.0659	-44.7998	-88.1824	-79.3052	22.6975	-5.68099	-90.4222	-88.5549	-17.3036	-29.8399	-76.9763	-81.7087	19.1488	16.411	-73.9533	-77.028	-32.0102	-17.9448	-84.0994	-84.1993	-12.6472	-16.6976	5.29262	4.40631
-88.6035	-92.2694	-68.8739	-49.3648	-85.5669	-85.1954	-0.387556	-24.0137	-89.9519	-84.6182	-12.422	21.2871	-90.1	-86.7766	-0.586201	-19.7257	-82.177	-87.3777	-21.1468	-45.5419	-90.4038	-94.4297	-40.6221	-18.5073	-87.1286	-89.3752	-18.5237	-46.0787	-91.2929	-82.4105	23.1706	-15.7969	-93.729	-91.7297	-27.621	-38.5216	-79.7489	-84.5435	20.1457	10.7687	-76.2475	-79.6802	-35.9681	-21.1001	-86.8136	-87.1278	-16.6214	-22.4177	5.37897	4.47881
-90.0589	-95.044	-71.4435	-58.6417	-88.2628	-88.1425	-4.23293	-32.1791	-92.6479	-87.5413	-18.3092	23.6094	-92.3619	-89.512	-0.87393	-28.9192	-85.2672	-90.5388	-26.1656	-49.0364	-93.4712	-97.6867	-47.2757	-25.1523	-90.0684	-92.2914	-24.7308	-41.3504	-94.52	-85.6153	23.2627	-24.2233	-96.9422	-94.8521	-37.2979	-46.6597	-82.6126	-87.3056	21.8534	1.98268	-78.5611	-82.4732	-40.2628	-24.7053	-89.5249	-90.0912	-20.4979	-27.7523	5.49208	4.54303
-91.5828	-97.8242	-70.816	-65.5325	-90.9896	-91.1416	-9.09693	-40.8204	-95.274	-90.5571	-24.8422	20.1727	-94.5876	-92.3291	-1.06277	-39.458	-88.2267	-93.5331	-31.3961	-51.7964	-96.6622	-101.09	-54.2142	-32.005	-93.0362	-95.3209	-30.468	-32.4024	-97.857	-88.8877	21.9787	-33.3556	-100.041	-97.9452	-45.2293	-53.4299	-85.5602	-90.048	23.1173	-9.81886	-81.0306	-85.3044	-45.9688	-28.8846	-92.2589	-93.0892	-24.3635	-33.3937	5.6185	4.62032
-94.6073	-100.606	-67.7096	-69.3279	-93.7012	-94.164	-15.179	-48.8935	-97.8678	-93.6593	-29.7688	36.7384	-96.9312	-95.2405	-1.16919	-50.4785	-91.1046	-96.5001	-36.3496	-48.8205	-99.9202	-104.615	-61.0956	-39.0111	-95.9754	-98.4685	-35.522	-24.108	-101.289	-92.2079	18.1797	-43.4138	-103.074	-101.036	-50.8133	-57.9247	-88.5499	-92.8522	22.2651	-22.9889	-83.7487	-88.0799	-53.2019	-33.8311	-95.1608	-96.1299	-28.2149	-36.5509	5.71644	4.7264
-98.3084	-103.386	-63.8902	-69.7412	-96.3847	-97.1916	-22.5605	-55.2112	-100.505	-96.8621	-30.8902	58.0414	-99.5018	-98.2393	-1.42084	-60.8704	-94.0149	-99.5752	-40.5251	-37.1199	-103.154	-108.219	-67.1817	-46.2985	-98.819	-101.665	-39.0823	-20.1014	-104.796	-95.5788	11.2253	-52.9635	-106.122	-104.15	-53.7476	-59.3652	-91.5441	-95.8132	18.0693	-34.9746	-86.7089	-90.7495	-60.9645	-39.6988	-98.169	-99.221	-31.9062	-38.0276	5.79103	4.85803
-99.0889	-106.166	-61.6075	-66.982	-99.0719	-100.221	-31.0428	-58.845	-103.261	-100.181	-27.013	37.5724	-102.309	-101.314	-2.32083	-69.6633	-97.1131	-102.811	-43.4162	-19.5815	-106.322	-111.838	-71.5087	-53.3356	-101.489	-104.791	-39.8735	-21.7949	-108.338	-99.0061	1.26594	-60.9978	-109.228	-107.291	-53.9045	-57.4165	-94.5375	-98.9863	10.8341	-43.5673	-89.8092	-93.3203	-68.1393	-46.5539	-100.961	-102.357	-35.1569	-41.9241	5.8855	4.99505
-102.224	-108.936	-62.5733	-62.0385	-101.82	-103.262	-40.1262	-59.4099	-106.119	-103.586	-20.0971	-3.14797	-105.276	-104.441	-4.46486	-76.144	-100.525	-106.195	-44.43	-7.6228	-109.453	-115.391	-73.1255	-58.3467	-103.964	-107.718	-37.1466	-33.0348	-111.811	-102.482	-11.0093	-66.8713	-112.4	-110.421	-51.3548	-52.4591	-97.5362	-102.336	2.28145	-47.2808	-92.9235	-95.8488	-73.5953	-54.3165	-104.005	-105.511	-37.7856	-47.3339	5.93182	5.11186
-107.35	-111.637	-67.2552	-56.7037	-104.66	-106.323	-49.116	-57.2508	-108.967	-106.99	-15.0166	-29.5505	-108.289	-107.557	-8.16914	-79.7741	-104.242	-109.657	-42.9441	-2.25914	-112.58	-118.793	-71.3665	-59.2004	-106.298	-110.378	-31.8205	-57.5096	-115.092	-105.984	-24.4174	-70.1958	-115.651	-113.47	-46.5906	-45.8675	-100.542	-105.771	-6.21831	-44.9848	-95.9719	-98.3899	-75.978	-62.6886	-107.24	-108.632	-39.8993	-51.4532	5.94448	5.1871
-110.877	-114.164	-74.4922	-52.8743	-107.557	-109.392	-57.1557	-53.7183	-111.697	-110.298	-14.9661	-17.7397	-111.243	-110.579	-13.2366	-80.1217	-108.113	-113.061	-38.7909	1.39967	-115.7	-121.995	-66.2636	-55.0276	-108.545	-112.805	-26.3753	-78.3167	-118.132	-109.48	-37.1449	-70.5073	-118.977	-116.38	-40.8283	-39.8786	-103.566	-109.212	-15.1403	-36.8885	-98.9315	-100.959	-74.1337	-71.1877	-110.303	-111.666	-41.6843	-50.4419	5.99112	5.21592
-113.615	-116.434	-81.5422	-51.7164	-110.438	-112.424	-63.2481	-51.4792	-114.281	-113.436	-32.1609	2.65314	-114.056	-113.459	-19.1048	-76.7569	-111.939	-116.234	-32.8974	7.28152	-118.769	-125.031	-59.0791	-47.4353	-110.711	-115.12	-23.5179	-75.4878	-120.989	-112.925	-47.3589	-67.3772	-122.336	-119.147	-35.9532	-37.1619	-106.613	-112.596	-26.1139	-26.2594	-101.825	-103.559	-67.7861	-79.0607	-113.234	-114.579	-44.433	-45.7091	6.04476	5.21439
-116.693	-118.417	-85.2714	-53.4468	-113.222	-115.345	-66.5267	-54.3377	-116.748	-116.347	-72.0533	-0.361143	-116.68	-116.192	-25.1001	-70.1347	-115.561	-119.037	-27.0369	13.9829	-121.732	-127.956	-52.2427	-40.3555	-112.778	-117.477	-25.5667	-57.7498	-123.749	-116.254	-54.0728	-61.0166	-125.675	-121.825	-34.4007	-40.8516	-109.653	-115.833	-39.5797	-18.9451	-104.702	-106.189	-58.5082	-85.171	-116.109	-117.352	-49.1236	-42.5806	6.11666	5.20539
-121.896	-120.12	-83.5859	-57.434	-115.851	-118.09	-66.6141	-68.5177	-119.118	-118.99	-98.8725	-5.97628	-119.096	-118.754	-30.5775	-62.6701	-118.856	-121.417	-22.6574	22.6725	-124.565	-130.764	-48.1562	-37.9497	-114.683	-119.947	-36.8221	-38.8858	-126.417	-119.42	-57.1838	-52.8924	-128.91	-124.44	-39.4604	-57.839	-112.617	-118.796	-52.7673	-18.7868	-107.592	-108.769	-50.1193	-88.1256	-119.055	-119.955	-53.347	-42.4004	6.26113	5.21269
-122.59	-121.547	-75.6392	-62.2565	-118.31	-120.631	-63.7821	-95.0521	-121.359	-121.336	-95.4699	-14.0871	-121.29	-121.087	-34.8473	-57.4691	-121.741	-123.398	-20.3111	42.7511	-127.272	-133.394	-48.141	-45.7498	-116.332	-122.472	-60.5238	-24.8576	-128.939	-122.435	-57.0973	-45.3826	-131.886	-126.941	-59.7772	-87.1932	-115.407	-121.393	-60.6822	-46.3061	-110.465	-111.116	-47.1184	-86.4997	-121.417	-122.341	-56.6718	-47.4639	6.27323	5.2678
-122.02	-122.698	-61.7717	-66.072	-120.597	-122.988	-59.1466	-118.646	-123.419	-123.374	-83.8478	-23.5835	-123.234	-123.151	-36.9748	-56.1847	-124.195	-125.04	-20.1277	60.4853	-129.868	-135.786	-52.3552	-71.3608	-117.738	-124.894	-84.1719	-14.9637	-131.285	-125.31	-54.5759	-40.4482	-134.423	-129.288	-93.3714	-107.976	-117.938	-123.659	-59.7243	-94.6224	-113.207	-113.078	-53.632	-79.3968	-123.448	-124.479	-59.9727	-55.7062	6.33811	5.39626
-124.53	-123.59	-44.2455	-67.4501	-122.656	-125.232	-54.8373	-127.425	-125.271	-125.11	-67.9697	-36.2857	-124.921	-124.954	-36.2926	-58.7854	-126.238	-126.447	-22.4043	53.8197	-132.336	-137.891	-59.523	-101.003	-119.05	-127.005	-91.014	-7.78288	-133.45	-128.01	-50.7706	-38.8975	-136.373	-131.546	-114.112	-109.282	-120.199	-125.716	-51.2524	-105.112	-115.692	-114.637	-71.1868	-68.2392	-125.52	-126.376	-60.328	-60.5857	6.35606	5.59773
-125.255	-124.255	-26.9976	-65.9022	-124.392	-127.444	-53.6347	-125.261	-126.914	-126.58	-51.2817	-49.1559	-126.41	-126.532	-32.9873	-64.1965	-127.868	-127.798	-27.5028	40.0979	-134.622	-139.664	-66.6036	-106.783	-120.355	-128.654	-84.7908	-2.19995	-135.447	-130.468	-47.1542	-40.7846	-137.69	-133.822	-113.828	-96.5749	-122.234	-127.686	-42.9006	-94.5094	-117.868	-115.835	-91.0008	-57.5584	-127.187	-128.067	-58.062	-60.2572	6.36054	5.85721
-126.043	-124.741	-12.9786	-61.6671	-125.788	-129.661	-58.4084	-111.215	-128.362	-127.853	-36.3237	-58.9063	-127.789	-127.918	-28.0996	-70.4084	-129.084	-129.299	-33.7169	35.9465	-136.645	-141.074	-70.2971	-94.6597	-121.613	-129.811	-71.9786	2.65238	-137.296	-132.657	-45.2342	-45.7329	-138.533	-136.152	-98.9389	-73.6477	-124.1	-129.617	-45.7904	-78.1711	-119.758	-116.67	-100.164	-51.4472	-128.637	-129.587	-54.721	-55.2051	6.33753	6.17066
-127.388	-125.081	-2.52259	-55.3068	-126.936	-131.831	-70.9002	-79.1782	-129.629	-128.985	-24.1785	-62.228	-129.086	-129.16	-23.3755	-74.7937	-129.962	-131.009	-35.7379	38.9409	-138.31	-142.101	-69.437	-72.5101	-122.793	-130.528	-57.6046	7.52889	-138.92	-134.585	-46.0716	-52.5608	-139.161	-138.44	-72.4824	-49.087	-125.867	-131.466	-69.2024	-60.585	-121.411	-117.08	-97.8201	-50.7135	-129.951	-130.933	-51.7575	-46.4085	6.26488	6.54818
-129.566	-125.253	5.326	-47.37	-127.9	-133.805	-87.6528	-38.3511	-130.713	-129.976	-13.9476	-57.751	-130.239	-130.322	-20.1897	-75.2044	-130.623	-132.747	-30.2108	42.2821	-139.516	-142.72	-64.9532	-48.3137	-123.895	-130.904	-44.5839	12.8983	-140.161	-136.276	-49.7548	-58.8266	-139.753	-140.474	-45.1898	-29.946	-127.589	-133.168	-99.273	-44.1881	-122.836	-117.016	-87.602	-54.1909	-131.163	-132.06	-48.912	-36.2692	6.11556	6.98779
-125.487	-125.161	11.527	-38.2142	-128.666	-135.413	-100.018	-13.6899	-131.57	-130.787	-4.03276	-48.9881	-131.181	-131.445	-19.0919	-70.9909	-131.14	-134.261	-20.0415	44.7672	-140.19	-142.917	-58.2573	-28.8735	-124.923	-131.06	-33.6965	18.7735	-140.95	-137.753	-55.2348	-61.7247	-140.349	-142.035	-25.6294	-16.408	-129.261	-134.686	-105.274	-30.2901	-123.998	-116.551	-73.918	-59.4977	-131.61	-132.915	-43.9698	-27.7397	6.26064	7.45567
-124.344	-124.635	16.8389	-28.2157	-129.262	-136.588	-103.735	-0.808452	-132.12	-131.405	7.00943	-42.7698	-131.949	-132.525	-20.3143	-63.2078	-131.514	-135.399	-9.14179	47.4377	-140.352	-142.744	-50.3261	-15.8069	-125.858	-131.099	-24.7313	25.5	-141.29	-138.985	-60.6684	-59.9885	-140.882	-143.001	-12.6508	-6.73508	-130.824	-135.942	-93.9215	-18.7835	-124.896	-115.867	-60.7267	-63.4348	-132.117	-133.472	-37.488	-20.6193	6.25074	7.90903
-127.819	-123.414	22.0484	-17.9416	-129.771	-137.407	-99.3388	7.2484	-132.252	-131.864	21.0969	-42.5355	-132.641	-133.556	-24.257	-53.9068	-131.729	-136.1	0.590812	49.9088	-140.125	-142.313	-41.6743	-7.61253	-126.553	-131.051	-17.2682	34.8577	-141.107	-139.844	-64.0904	-54.3097	-141.147	-143.313	-3.66251	0.600336	-132.184	-136.776	-73.0438	-8.44181	-125.587	-115.098	-49.3415	-63.788	-132.811	-133.703	-29.9037	-14.1746	5.6499	8.33993
-125.961	-121.198	30.7211	-7.9465	-130.258	-137.961	-87.4257	13.4511	-131.829	-132.153	39.8814	-48.1579	-133.325	-134.569	-31.5533	-44.694	-131.767	-136.273	8.76139	56.5575	-139.588	-141.67	-32.6973	-2.31793	-126.751	-130.784	-10.9981	48.2149	-140.19	-140.131	-64.179	-46.3849	-140.85	-142.932	3.12751	6.77239	-133.232	-137.008	-49.2622	1.8391	-126.126	-114.21	-39.5679	-60.696	-132.716	-133.535	-21.1993	-7.57839	5.49776	8.79398
-122.173	-117.82	53.3759	1.48268	-130.764	-138.243	-68.9898	19.291	-130.666	-132.105	57.2092	-57.5047	-133.989	-135.605	-41.9205	-35.9418	-131.607	-135.736	15.8356	62.1139	-138.664	-140.711	-23.8565	1.86428	-126.276	-130.02	-5.58657	61.4917	-138.308	-139.603	-60.6673	-37.7259	-139.828	-141.862	8.88017	12.797	-133.852	-136.491	-29.2564	12.0501	-126.533	-113.074	-31.1827	-55.8617	-132.06	-132.843	-11.469	-1.4494	5.61706	9.34042
-122.815	-113.336	85.6582	10.4059	-131.308	-138.176	-47.4333	25.5226	-128.538	-131.409	62.6917	-65.4251	-134.556	-136.668	-52.0838	-27.3672	-131.187	-134.199	22.6917	66.8357	-137.227	-139.262	-15.4888	6.70949	-125.057	-128.481	-0.307005	67.8789	-135.488	-138.016	-54.2509	-28.8896	-138.135	-140.16	14.4671	19.9234	-133.911	-135.099	-15.1946	22.3257	-126.794	-111.529	-24.1596	-50.8808	-131.365	-131.485	-2.12812	4.27627	5.05625	10.0355
-124.573	-107.959	99.0523	19.1413	-131.863	-137.67	-27.4697	32.7071	-125.312	-129.735	55.5726	-66.7767	-134.877	-137.665	-57.7248	-18.8611	-130.368	-131.293	30.5542	71.094	-135.19	-137.098	-7.60077	15.738	-122.998	-125.949	6.48261	67.6852	-131.987	-135.169	-46.0621	-19.8248	-135.86	-137.833	20.8256	30.4608	-133.261	-132.743	-4.6442	40.3755	-126.826	-109.357	-18.4734	-46.2903	-130.283	-129.315	4.59203	11.4044	4.61414	10.9018
-121.416	-102.078	98.5476	28.2026	-132.297	-136.633	-11.45	46.7677	-121.057	-126.849	41.8875	-61.6953	-134.679	-138.364	-58.2657	-10.676	-128.847	-126.675	41.2252	77.3105	-132.366	-133.897	0.0666943	36.2922	-119.981	-122.158	18.6552	66.6806	-127.829	-130.993	-36.9615	-10.5681	-133.027	-134.796	29.7262	48.2232	-131.711	-129.447	6.31691	71.9677	-126.46	-106.325	-13.862	-41.8058	-128.152	-126.201	10.5351	22.7909	5.29061	11.9052
-119.53	-96.3664	91.4633	38.8399	-132.338	-134.976	0.961234	79.3436	-116.015	-122.72	33.7131	-53.3899	-133.566	-138.389	-55.5405	-3.16397	-126.118	-120.325	56.5857	88.8856	-128.406	-129.399	7.80007	64.451	-115.966	-116.947	41.0843	69.2171	-122.763	-125.669	-27.2458	-1.38978	-129.584	-130.934	45.1994	72.4945	-128.991	-125.256	21.8889	89.7952	-125.431	-102.271	-9.60331	-37.0542	-125.337	-122.114	18.7551	37.0935	6.10925	12.9254
-111.895	-91.661	76.7497	54.9135	-131.597	-132.615	11.0107	101.857	-110.649	-117.651	52.2888	-43.7628	-131.062	-137.333	-50.8183	3.46925	-121.675	-112.951	74.5249	103.068	-123.152	-123.748	15.6631	77.3646	-111.045	-110.807	65.793	73.6724	-116.99	-119.581	-16.9742	7.42775	-125.432	-126.166	70.0427	90.7526	-124.821	-120.086	44.114	85.066	-123.351	-97.2262	-4.42155	-31.9899	-121.061	-117.257	30.7248	47.4398	7.50706	13.7495
-107.924	-88.6142	52.015	80.2817	-129.653	-129.469	19.8342	101.524	-105.793	-112.305	82.2145	-33.2453	-126.761	-134.878	-44.3911	9.24666	-115.537	-105.974	86.3213	119.268	-117.22	-117.758	23.4413	71.9627	-105.493	-105.02	77.7142	74.547	-111.343	-113.204	-6.38657	15.8033	-120.707	-120.579	91.8905	97.4936	-119.228	-114.056	65.8995	67.6047	-119.778	-91.585	3.15735	-26.8608	-116.312	-112.131	41.0646	52.5114	8.06944	14.1053
-106.264	-87.4242	24.5242	102.167	-126.2	-125.434	28.238	93.4026	-102.46	-107.575	93.2124	-22.7132	-120.718	-130.888	-36.4095	14.437	-108.776	-100.69	86.7254	126.791	-112.066	-112.703	30.8493	59.1602	-99.8807	-100.947	75.8464	67.7287	-106.527	-107.172	4.0529	23.9157	-116.179	-114.747	100.291	95.8693	-112.954	-107.961	76.9083	44.172	-114.572	-86.2059	13.9711	-21.9851	-111.509	-107.432	45.2917	52.995	7.8175	13.7633
-104.545	-87.8515	6.94438	109.59	-121.245	-120.412	36.6853	81.3213	-101.303	-104.279	87.5643	-13.4278	-113.818	-125.551	-27.4407	19.5638	-103.2	-97.5307	77.1132	116.07	-109.04	-109.635	38.015	54.7624	-95.1091	-99.2906	62.2984	52.9271	-102.63	-102.193	13.9002	32.1496	-113.103	-109.774	97.946	87.7154	-107.434	-103.036	76.3011	31.154	-108.368	-82.2055	27.1641	-17.5558	-107.254	-103.796	45.1356	50.3882	7.11037	12.6592
-103.53	-89.4227	1.48676	106.407	-115.31	-114.647	45.3724	65.5574	-102.249	-102.857	72.1864	-5.89975	-107.662	-119.564	-18.3699	25.3528	-100.057	-96.2247	62.5765	93.8883	-108.349	-108.808	46.5213	62.0654	-92.1124	-99.934	45.2231	33.9046	-99.2989	-98.7476	22.9822	40.9869	-112.304	-106.582	86.8482	72.663	-104.007	-100.212	67.0445	43.9725	-102.666	-80.4438	39.738	-13.5673	-104.322	-101.586	42.8736	47.7574	6.41932	10.995
-102.658	-91.5753	3.58871	95.7361	-109.496	-109.045	54.7353	47.8876	-104.587	-103.24	49.4113	0.294905	-103.807	-114.147	-9.9797	32.4633	-99.2899	-96.2699	50.4047	81.3262	-109.104	-109.643	61.1039	68.2294	-91.4362	-102.128	37.9893	15.9911	-96.0977	-96.9643	31.4832	50.9065	-113.341	-105.235	66.8802	51.247	-103.084	-99.6521	51.888	69.4055	-99.1257	-81.1431	48.3474	-9.86756	-102.912	-100.822	40.532	45.7836	6.32255	9.27228
-107.09	-93.7086	38.3007	77.3964	-105.137	-104.868	68.2083	32.2199	-107.321	-104.944	25.0468	5.88553	-102.896	-110.612	-2.64606	40.9035	-99.9821	-97.111	46.1035	171.386	-110.154	-111.13	80.8738	62.4749	-92.9794	-104.819	45.1596	2.27463	-92.7651	-96.6406	39.9019	62.287	-114.842	-105.096	43.4568	29.8347	-104.064	-100.818	34.7153	74.6234	-98.4942	-83.866	51.5992	-6.24733	-103.248	-101.238	42.7927	50.2762	6.82955	7.98233
-110.624	-95.2459	77.2432	54.2973	-103.207	-102.993	89.442	21.9719	-109.506	-107.286	7.62848	11.3661	-104.432	-109.615	3.72867	49.5227	-101.108	-98.0703	52.5053	224.426	-110.637	-112.311	91.7486	46.9448	-95.9888	-106.984	62.0264	-7.16524	-89.2566	-97.2331	48.9957	74.8897	-115.609	-105.359	27.0956	17.2594	-105.808	-102.798	21.1046	59.1903	-100.214	-87.7174	50.0128	-2.47959	-104.217	-102.329	48.321	50.0203	7.48892	7.1874
-111.56	-95.7103	79.5186	35.4939	-104.009	-103.479	105.159	29.0623	-110.49	-109.574	-1.63726	17.0276	-107.243	-110.844	9.6145	56.5348	-101.868	-98.3107	68.5232	259.2	-110.051	-112.529	88.3453	30.8213	-99.4145	-107.859	73.9764	-13.4863	-85.5571	-97.9621	59.7528	86.9378	-115.155	-105.388	22.3183	17.2541	-107.197	-104.641	19.229	38.1377	-102.954	-91.7088	45.2177	1.67504	-105.045	-103.455	51.8197	50.7871	7.97395	6.73429
-110.309	-94.7444	66.7157	26.449	-106.99	-105.632	106.214	62.9733	-109.923	-111.185	-7.39748	23.5455	-110.144	-113.345	15.6367	60.6927	-101.646	-97.0156	84.0555	278.159	-108.168	-111.469	75.9356	20.6958	-102.326	-106.96	72.2822	-17.9295	-81.5877	-98.0733	73.0726	95.6062	-113.481	-104.759	32.6106	30.8558	-107.46	-105.588	37.9054	20.5878	-105.467	-95.1276	39.9536	6.35286	-105.228	-103.991	54.2713	55.2717	8.58524	6.76431
-109.279	-92.0779	49.6304	27.6563	-110.674	-108.344	98.3246	88.5701	-107.607	-111.586	-13.7356	32.5714	-112.264	-116.03	22.4203	61.6682	-99.9047	-93.6104	90.9288	274.218	-104.902	-109.03	61.5063	16.0899	-104.029	-103.996	58.8467	-21.612	-77.2083	-97.0053	87.7698	99.1493	-110.693	-103.194	60.6274	57.5232	-106.183	-105.115	61.0411	9.75189	-107.041	-97.5855	37.6571	11.3051	-104.526	-103.416	55.9106	59.7174	9.72042	7.64668
-110.246	-87.4991	31.4156	47.7223	-113.464	-110.52	86.711	91.2246	-103.401	-110.323	-21.45	43.8032	-113.051	-118.025	30.5626	59.7394	-96.1857	-87.9255	90.5265	257.868	-100.15	-105.144	52.3356	12.8995	-104.018	-98.8617	39.5643	-25.5047	-71.7383	-94.3831	99.0453	97.768	-106.76	-100.506	81.6431	79.53	-103.121	-102.836	65.7862	4.09806	-107.443	-98.8211	39.682	15.9182	-102.689	-101.35	54.1657	62.2788	11.5278	9.45081
-110.084	-81.0002	16.1038	77.8088	-114.583	-111.404	72.8979	85.7425	-97.2831	-106.994	-29.0305	50.8442	-112.159	-118.799	40.4247	55.5099	-90.2228	-80.4201	86.6758	244.467	-93.7397	-99.6528	56.2342	8.72137	-101.95	-91.8993	20.7984	-30.2288	-64.3712	-89.9534	103.022	93.0807	-101.448	-96.488	80.7463	83.8846	-98.0107	-98.3996	54.069	0.29014	-106.637	-98.5919	43.3394	19.7261	-99.1353	-97.6002	49.571	62.7133	13.8545	11.8193
-111.98	-73.2271	5.06512	91.4343	-113.943	-110.553	60.43	76.9154	-89.6056	-101.267	-34.8961	47.9074	-109.322	-118.094	51.3343	49.9644	-82.2633	-72.331	81.52	220.5	-85.7088	-92.3727	72.6037	3.91376	-97.6693	-84.2452	5.79306	-35.9703	-55.9616	-83.6821	100.058	87.658	-94.3845	-90.8514	63.532	73.7952	-90.6002	-91.5635	35.2799	-4.05979	-104.558	-96.6959	44.5116	22.6611	-94.1815	-92.2621	44.112	57.7018	16.6276	14.1511
-104.576	-65.5901	-2.40307	88.0896	-111.494	-107.588	48.3984	65.191	-81.4014	-93.161	-38.714	37.2759	-104.296	-115.77	60.9632	44.9153	-73.4446	-65.2321	75.7782	150.882	-76.8919	-83.5064	85.2791	-0.94272	-91.3348	-77.4563	-5.5398	-42.5014	-48.6288	-76.1138	93.3063	84.6305	-85.4844	-83.4893	34.2185	53.7869	-81.0892	-82.633	14.9379	-9.54626	-101.083	-93.0804	41.0725	24.7934	-87.2476	-85.7837	37.027	45.1431	18.0314	15.7977
-76.8941	-59.4219	-7.90459	77.2976	-106.922	-102.043	61.9943	52.5575	-74.1213	-83.6201	-41.3347	26.5321	-96.9295	-111.654	66.5981	43.2657	-65.445	-60.1596	69.1773	145.518	-68.8801	-74.1673	84.9242	-5.84632	-83.752	-72.563	-14.1883	-49.1995	-43.5818	-68.5215	87.1604	86.8945	-75.6225	-75.0299	1.33341	27.3774	-70.6911	-72.9545	-2.19566	-15.6487	-96.2139	-88.0525	33.2522	26.0933	-78.0957	-78.9262	30.8015	37.7129	17.4936	16.3269
-55.8446	-55.2036	-12.7714	62.0584	-99.7801	-93.6341	91.0015	40.8446	-68.7959	-74.5372	-43.9211	45.2822	-87.5761	-105.48	66.9795	47.532	-59.3984	-57.2686	60.775	221.633	-62.9341	-65.9994	74.6836	-10.5378	-76.3984	-69.7048	-20.7351	-55.2343	-40.7393	-62.2939	85.7022	94.719	-66.5314	-66.859	-23.874	1.67763	-61.2818	-64.4094	-13.6678	-21.8033	-90.3324	-82.468	22.9853	26.5105	-69.9648	-72.5326	26.1053	41.1529	17.2002	15.558
-51.0358	-52.6989	-17.8176	44.826	-90.1866	-83.0548	100.794	31.2626	-65.5949	-67.5927	-47.2644	80.3151	-77.6235	-97.1464	62.7076	57.08	-55.4318	-56.164	49.3385	246.583	-59.2945	-60.059	57.6357	-14.932	-70.6111	-68.4835	-25.2692	-60.158	-39.617	-58.1427	89.9511	103.751	-59.6126	-60.2525	-39.4571	-17.4172	-54.154	-58.1546	-20.4073	-27.8488	-84.339	-77.5004	13.1173	26.3735	-64.3183	-67.2045	20.3026	42.7123	15.1806	13.6061
-53.6679	-51.4276	-23.4669	28.8192	-79.6938	-72.4073	99.5648	23.8123	-64.0972	-63.3248	-51.6991	92.4568	-69.0319	-87.3882	58.3313	67.9221	-53.1271	-56.3047	34.3553	252.134	-57.536	-56.4435	36.5945	-19.4274	-66.8805	-68.3802	-27.8745	-64.4476	-39.7143	-56.0108	96.3715	109.187	-55.1926	-55.6858	-48.6445	-29.6989	-49.4713	-54.2541	-24.3689	-33.8424	-79.3446	-74.0374	5.63372	26.8539	-60.7052	-63.2422	14.0725	41.2517	12.4144	11.1089
-58.138	-50.9459	-29.884	16.1503	-70.7073	-63.9325	96.8784	17.7568	-63.7042	-61.3844	-57.4356	86.8946	-63.0385	-78.0329	63.6866	75.7976	-52.031	-57.1952	17.4942	135.607	-57.1184	-54.7555	17.1276	-24.258	-64.9968	-68.9453	-29.0305	-68.9667	-40.5076	-55.4545	100.455	109.9	-52.8526	-52.9626	-53.8513	-37.6932	-46.7461	-52.238	-27.5988	-39.7059	-76.0799	-72.3389	0.861441	29.4235	-58.72	-60.7442	8.973	27.355	10.4168	9.03617
-59.672	-50.9371	-37.0102	7.03908	-64.6915	-58.5206	90.4918	12.3888	-63.9007	-61.1555	-64.5528	74.5296	-59.6987	-70.8791	78.182	78.7476	-51.8216	-58.4366	1.78358	57.2858	-57.6132	-54.5058	4.05447	-29.4114	-64.5109	-69.8301	-29.6317	-74.2876	-41.5216	-55.9256	100.589	106.816	-51.961	-51.6426	-56.4536	-43.4616	-45.3695	-51.5807	-32.3996	-45.147	-74.6663	-72.1672	-1.73357	34.1105	-57.7661	-59.5983	4.84719	16.2372	9.54302	7.98042
-60.2505	-51.1992	-44.576	0.549065	-61.6477	-55.8342	80.8549	7.3104	-64.3978	-62.0417	-72.5943	56.2975	-58.4191	-66.5483	90.7339	76.2571	-52.2829	-59.7261	-11.1152	67.8947	-58.71	-55.2367	-1.72278	-35.0371	-64.9849	-70.7897	-30.6812	-80.8254	-42.4373	-56.8916	97.1889	100.826	-51.9099	-51.3216	-57.1617	-48.0031	-44.8169	-51.8397	-39.5591	-49.9197	-74.8079	-73.0828	-2.84119	38.831	-57.6968	-59.5011	0.775113	12.1983	9.35965	7.7526
-60.4333	-51.5884	-52.0929	-4.47633	-60.8738	-55.1317	67.4706	2.18255	-65.1082	-63.497	-80.6475	38.0627	-58.4894	-64.6532	96.4978	68.413	-53.2554	-60.8403	-21.46	59.1931	-60.1809	-56.5518	-2.24445	-41.4336	-66.0283	-71.677	-32.7499	-88.5954	-43.0997	-57.921	90.7139	92.1382	-52.1933	-51.7186	-56.479	-51.4428	-44.6999	-52.6506	-47.4685	-54.2318	-76.022	-74.6421	-3.24846	40.8849	-58.2168	-60.0792	-3.79167	5.51769	9.5581	7.86465
-59.6983	-51.9688	-59.0304	-8.96621	-61.5468	-55.6995	50.734	-3.44994	-66.018	-65.0722	-87.9931	24.5836	-59.3067	-64.4937	96.256	55.938	-54.5881	-61.6492	-30.0088	47.535	-61.8261	-58.1244	-0.359646	-48.5604	-67.2769	-72.4126	-35.8133	-96.9743	-43.4609	-58.7689	81.2789	79.7398	-52.4574	-52.6238	-55.081	-53.5138	-44.774	-53.7071	-54.2861	-58.8273	-77.793	-76.4673	-3.74334	38.7576	-58.9769	-60.9989	-8.91335	-2.158	9.96042	8.03085
-58.1478	-52.2089	-65.1606	-13.4605	-62.9416	-56.9614	32.9517	-10.0366	-67.1115	-66.5263	-94.3984	16.8229	-60.4404	-65.4109	89.9944	39.1791	-56.0808	-62.1473	-37.2208	16.5215	-63.4161	-59.6999	1.6891	-55.8305	-68.396	-72.9504	-39.5933	-105.282	-43.5155	-59.3963	68.8937	53.3957	-52.5044	-53.8034	-53.8804	-54.1052	-44.8971	-54.7613	-59.922	-64.4951	-79.7002	-78.2424	-4.80896	32.6221	-59.741	-62.0099	-14.6778	-13.1517	10.506	8.17786
-56.829	-52.2223	-70.7119	-18.1217	-64.5222	-58.4862	17.573	-17.7816	-68.3275	-67.8409	-99.9147	12.3958	-61.6349	-66.8714	76.426	18.9054	-57.4991	-62.4357	-43.3269	-16.8372	-64.7245	-61.1023	2.78982	-62.6297	-69.1369	-73.2538	-43.7952	-113.068	-43.277	-59.8727	54.0579	20.614	-52.2484	-54.9484	-53.6927	-53.594	-44.9656	-55.6411	-66.2532	-71.4578	-81.4837	-79.7137	-6.56185	23.881	-60.4226	-62.9444	-21.2191	-25.2449	11.1353	8.31919
-58.4822	-52.0065	-76.1861	-22.927	-65.9593	-59.9841	5.81631	-26.3718	-69.5396	-69.0783	-104.678	9.06239	-62.7771	-68.4937	48.3099	-2.06929	-58.6605	-62.6374	-48.4933	-34.4054	-65.6231	-62.2231	2.62603	-68.8054	-69.4082	-73.2931	-48.0918	-120.119	-42.8252	-60.2508	38.7708	14.1425	-51.6901	-55.7508	-54.9085	-52.7172	-44.8981	-56.2605	-75.9804	-79.2186	-83.0077	-80.7292	-9.07537	14.2485	-61.1701	-63.7007	-29.2628	-33.5618	11.6827	8.47475
-59.6104	-51.6391	-81.8734	-27.8541	-67.1474	-61.2912	-3.97887	-34.9218	-70.6031	-70.2049	-108.635	6.47864	-63.8183	-70.0483	7.11946	-20.4857	-59.4846	-62.7786	-52.8104	-37.1665	-66.1136	-62.9908	1.22582	-74.4966	-69.2628	-73.0512	-52.1152	-126.412	-42.3114	-60.5095	26.1232	25.629	-50.9115	-56.0454	-57.3037	-52.1963	-44.6653	-56.6018	-89.3751	-87.1245	-84.168	-81.2809	-12.8464	4.6971	-61.6451	-64.222	-38.5881	-38.5321	12.1928	8.64829
-59.9846	-51.2346	-87.3852	-32.8569	-68.1933	-62.3193	-13.9112	-42.3652	-71.412	-71.0736	-111.273	5.74467	-64.6985	-71.4274	-25.902	-35.0788	-59.963	-62.7741	-56.3203	-32.4601	-66.2683	-63.3836	-1.26354	-79.7225	-68.8218	-72.5438	-55.5049	-131.674	-41.9005	-60.5387	17.9098	22.8207	-50.0382	-55.8396	-59.7473	-52.5269	-44.3224	-56.6907	-102.702	-95.0602	-84.8401	-81.4879	-18.6733	-4.8305	-61.8584	-64.483	-46.7975	-43.4554	12.6024	8.83812
-59.934	-50.9017	-91.78	-37.8093	-69.2359	-63.0027	-24.8066	-47.9515	-71.933	-71.5892	-111.814	7.91618	-65.3706	-72.6115	-42.5564	-46.3998	-60.0971	-62.5532	-59.0942	-31.9454	-66.1748	-63.4719	-4.84225	-84.2708	-68.2276	-71.8285	-57.8816	-135.329	-41.7568	-60.1601	13.4442	9.71036	-49.1638	-55.2375	-60.7722	-53.7759	-44.0164	-56.5814	-112.46	-103.12	-84.9161	-81.4893	-26.7848	-14.7908	-61.8933	-64.4933	-52.6679	-48.8878	12.8432	9.04285
-58.8901	-50.7186	-94.2701	-42.5556	-70.2022	-63.3038	-35.9884	-51.4505	-72.2558	-71.809	-110.1	12.6294	-65.8737	-73.6334	-52.4031	-55.4092	-59.8653	-62.1462	-61.2323	-34.5149	-65.9454	-63.4203	-9.96923	-87.9682	-67.668	-70.9845	-58.9034	-136.978	-42.0167	-59.2311	10.6303	-4.86678	-48.3181	-54.3621	-59.8161	-55.1829	-43.9464	-56.3327	-118.162	-110.596	-84.3739	-81.3317	-36.4145	-25.3029	-61.7596	-64.2976	-56.9663	-53.836	12.8911	9.2577
-57.4524	-50.7226	-94.7473	-46.9256	-70.8825	-63.2584	-46.0639	-53.0744	-72.6187	-71.8488	-107.038	17.9247	-66.3396	-74.5527	-58.9971	-62.8136	-59.2139	-61.6699	-62.8324	-39.6102	-65.7392	-63.4203	-17.3986	-90.942	-67.38	-70.1123	-58.3758	-136.466	-42.6753	-57.7756	7.44797	-20.897	-47.5395	-53.3121	-57.1801	-55.2782	-44.3062	-55.9901	-120.515	-116.348	-83.3047	-80.9633	-46.1722	-35.8579	-61.5865	-63.966	-60.1702	-58.208	12.7651	9.47526
-52.9324	-50.9042	-93.6376	-50.7288	-71.2782	-62.983	-53.8514	-53.2746	-73.2792	-71.7657	-103.551	21.3758	-66.9499	-75.4337	-63.7147	-68.8809	-58.0624	-61.267	-63.9413	-52.2932	-65.7441	-63.5987	-27.2953	-93.519	-67.5569	-69.3299	-56.1662	-133.64	-43.4824	-56.048	2.69139	-34.5557	-46.9427	-52.172	-53.2892	-53.0064	-45.2397	-55.5836	-120.958	-120.269	-81.9127	-80.3475	-54.6786	-45.6714	-61.2164	-63.5848	-62.5811	-62.2239	12.7308	9.68981
-55.4469	-51.2088	-91.4487	-53.7774	-71.6635	-62.6446	-58.7098	-52.5941	-74.3306	-71.5811	-99.8074	21.5713	-67.8672	-76.2897	-66.8753	-73.4634	-56.3424	-61.0334	-64.5431	-67.0097	-66.0745	-63.9892	-38.3671	-95.9207	-68.2658	-68.7463	-52.3504	-128.326	-44.0356	-54.4208	-7.52736	-45.2329	-46.7084	-51.0277	-48.6053	-48.5853	-46.7842	-55.1283	-120.879	-123.045	-80.4959	-79.5533	-61.2822	-54.2492	-61.6377	-63.2385	-64.5814	-65.512	12.4072	9.89731
-60.3743	-51.5543	-88.4983	-55.8318	-72.2878	-62.4031	-60.554	-51.5886	-75.6788	-71.3687	-95.5765	18.9462	-69.155	-77.0494	-68.5969	-76.0153	-54.0398	-60.9848	-64.6173	-73.196	-66.6349	-64.5671	-48.2477	-97.9104	-69.4452	-68.4582	-47.5406	-120.504	-44.0012	-53.1207	-22.4601	-53.0991	-47.0304	-49.9303	-43.6277	-43.0239	-48.8025	-54.643	-120.193	-124.771	-79.3581	-78.6508	-66.2091	-61.513	-62.4371	-62.9755	-66.011	-67.137	12.282	10.091
-61.6499	-51.8672	-84.8491	-56.5704	-73.1765	-62.3383	-59.8341	-50.7132	-77.1155	-71.246	-90.7034	15.1898	-70.7369	-77.5971	-68.848	-76.0215	-51.1476	-61.0622	-64.1335	-74.4749	-67.1023	-65.2819	-54.7783	-98.6458	-70.9223	-68.4918	-42.6891	-110.558	-43.1169	-52.08	-32.1596	-58.5173	-48.0209	-48.8386	-38.7091	-37.2718	-50.9856	-54.1492	-117.941	-124.787	-78.7329	-77.5711	-69.9062	-67.7139	-62.9734	-62.7748	-65.8683	-67.2803	12.6338	10.2687
-66.0272	-52.0862	-80.4371	-55.8103	-74.2255	-62.3768	-57.4157	-50.2292	-78.3835	-71.2936	-85.2717	11.7209	-72.4049	-77.8008	-67.4624	-73.7245	-47.5328	-61.1008	-63.0028	-74.2373	-66.9399	-66.0628	-56.6573	-97.1109	-72.4637	-68.6805	-38.6039	-99.3267	-41.0814	-50.9905	-37.0112	-61.6614	-49.5872	-47.5945	-34.027	-31.9473	-52.9092	-53.588	-113.468	-122.308	-78.7877	-76.1747	-72.0881	-73.1089	-63.6675	-62.5227	-64.1314	-66.1585	13.4577	10.4586
-61.8571	-52.1487	-75.3962	-53.8045	-75.3872	-62.1963	-54.3732	-50.1767	-79.2485	-71.5042	-79.549	8.98072	-73.8512	-77.4828	-64.4541	-69.6026	-42.9191	-60.7558	-61.1208	-69.1812	-65.2733	-66.7922	-53.5908	-92.8568	-73.8994	-68.6086	-35.6916	-88.0741	-37.5503	-49.3935	-40.0106	-62.2588	-51.344	-45.9183	-29.7188	-27.3673	-54.0345	-52.6841	-106.683	-116.895	-79.5596	-74.3797	-70.9048	-77.4273	-63.1749	-61.9877	-61.0449	-63.5149	14.8376	10.7373
-58.5083	-51.8247	-70.1942	-51.2293	-76.6372	-61.1495	-51.713	-50.3705	-79.5328	-71.7551	-73.8524	6.81144	-74.7086	-76.4239	-60.381	-64.3628	-37.1553	-59.4921	-58.4604	-70.0536	-58.8745	-67.092	-46.7942	-86.2654	-75.1387	-67.5201	-33.928	-78.1792	-32.2012	-46.6515	-41.0396	-59.9352	-52.567	-43.3547	-25.9694	-23.5934	-53.7655	-50.891	-97.955	-108.759	-80.8346	-72.1595	-63.3935	-79.8632	-61.8112	-60.7558	-56.6982	-60.5272	17.0121	11.2383
-62.2076	-50.6648	-65.4351	-48.8584	-77.7209	-58.1304	-50.0918	-50.5268	-79.0658	-71.7851	-68.417	4.99273	-74.5588	-74.4709	-56.2659	-59.637	-30.7526	-56.589	-55.0748	-71.2037	-42.3626	-65.7989	-38.9974	-78.2618	-75.9902	-63.6429	-33.0798	-70.4074	-25.2371	-41.6846	-40.4219	-54.9812	-52.0935	-39.1264	-23.0124	-20.6056	-51.7047	-47.5489	-88.22	-98.7627	-82.1666	-69.4934	-49.566	-79.4924	-59.4419	-58.085	-51.6893	-57.0677	20.3574	12.1385
-64.0238	-45.5952	-61.6645	-47.2638	-77.8969	-50.112	-49.6686	-50.4816	-77.6041	-71.2166	-63.45	3.11175	-72.9121	-71.6757	-53.1021	-56.7983	-25.085	-51.1984	-51.055	-60.5388	-21.195	-59.7631	-32.7043	-69.9017	-75.9914	-53.4107	-33.0201	-64.8669	-18.0846	-32.8996	-38.8136	-48.4186	-48.0402	-32.1673	-21.0647	-18.519	-47.9445	-42.2583	-78.8973	-88.2553	-83.0078	-66.3041	-35.8348	-75.8418	-55.6169	-52.4183	-47.2068	-52.5249	24.8134	13.8551
-61.9127	-28.8504	-59.2557	-46.7336	-75.3749	-32.6363	-50.1473	-50.2549	-74.848	-69.6455	-59.2787	0.443045	-69.3303	-68.2541	-51.4381	-56.0088	-21.5957	-42.9883	-46.5687	-47.9213	-10.2086	-45.2456	-28.6827	-61.9255	-74.1879	-36.2456	-33.8372	-61.6052	-12.8993	-20.0385	-37.0082	-41.6266	-38.2465	-22.2731	-20.2707	-17.6328	-43.2053	-35.4343	-71.1685	-78.7952	-82.7828	-62.3283	-27.8909	-69.4207	-51.3265	-42.1764	-44.1406	-48.3165	27.1445	17.5677
-57.0341	-5.76796	-58.3265	-47.2933	-65.7542	-10.4472	-50.9504	-49.9334	-70.6336	-66.7782	-56.2597	-3.17743	-63.7812	-64.3606	-51.2499	-56.5321	-20.851	-33.1863	-41.8926	-33.5862	-8.36963	-26.8986	-26.4875	-54.7515	-68.3449	-20.9996	-35.7788	-60.6172	-11.0763	-6.99187	-35.6304	-35.8791	-24.0273	-11.7858	-20.7989	-18.27	-38.7093	-28.5768	-65.5265	-71.5256	-80.8087	-56.8712	-25.1863	-61.856	-46.3082	-30.2422	-42.5534	-44.8565	26.3609	22.7775
-46.0476	2.90404	-58.7232	-48.7515	-45.7743	3.16692	-51.4896	-49.563	-65.1603	-62.5754	-54.7053	-7.12839	-57.012	-59.9835	-51.9984	-57.3242	-22.5564	-24.2341	-37.3717	-23.4131	-10.2276	-15.987	-25.3272	-48.81	-54.9308	-14.4323	-39.1119	-61.3888	-12.7902	1.28621	-34.9358	-31.8712	-12.3131	-4.13093	-22.9497	-20.5832	-35.7129	-23.5755	-61.9081	-66.8541	-75.8931	-48.3165	-25.7524	-55.1659	-39.8562	-22.3525	-42.2067	-42.8049	22.8459	24.4874
-24.2328	-0.505173	-60.0716	-50.7964	-24.9953	7.65077	-51.4412	-49.1345	-59.0668	-57.3893	-55.0117	-10.5303	-50.4099	-55.0812	-52.9327	-57.484	-26.0544	-17.8887	-33.331	-19.1009	-14.8646	-13.0815	-24.409	-44.5733	-35.4509	-14.3738	-43.958	-63.0473	-17.5106	3.98606	-34.821	-29.6557	-7.36611	-0.486315	-27.0345	-24.5819	-34.9188	-21.6222	-59.6238	-64.5739	-65.2617	-35.0714	-28.2254	-50.3738	-32.7393	-18.533	-42.8054	-42.1684	18.5673	22.4042
-6.66828	-8.36929	-61.8539	-53.0942	-14.4979	7.33056	-50.8227	-48.5938	-53.3022	-52.0344	-57.4416	-12.7361	-45.1647	-49.7814	-53.4804	-56.5232	-30.7018	-14.6581	-29.9536	-16.1668	-22.2525	-14.7391	-23.1017	-42.2912	-20.6756	-18.9588	-50.1512	-64.8824	-24.3022	2.3312	-34.9396	-28.843	-7.94929	-0.234808	-33.0622	-30.2062	-36.2302	-22.9439	-57.5327	-63.9548	-46.6376	-20.3775	-31.5196	-47.1613	-28.0348	-17.4941	-43.9872	-42.223	15.8017	19.1879
1.77528	-19.713	-63.5062	-55.342	-11.5409	3.30026	-49.8309	-47.8579	-48.7941	-47.5754	-61.6741	-13.6893	-41.6852	-44.5138	-53.3336	-54.4235	-36.0955	-14.8302	-27.1993	-9.14154	-31.7828	-20.0334	-21.1328	-41.6471	-15.138	-27.5429	-57.0008	-66.6071	-31.9353	-2.79059	-34.8374	-28.766	-12.5576	-2.76635	-40.4283	-37.0985	-38.9742	-27.1652	-54.7602	-64.1171	-27.0957	-11.5337	-34.5176	-44.559	-26.7113	-19.5604	-45.2928	-42.1136	15.4252	16.4377
1.24772	-33.438	-64.6146	-57.2656	-13.4139	-4.18685	-48.5991	-46.8352	-46.0888	-44.8304	-66.6234	-13.9134	-39.8123	-40.0383	-52.2837	-51.4859	-42.0685	-19.0421	-24.8217	-6.08884	-41.7944	-28.89	-18.6896	-41.728	-15.9531	-38.2412	-63.28	-68.2277	-39.2628	-10.687	-34.1173	-28.6439	-20.7022	-7.91652	-47.8583	-44.3058	-42.2282	-33.5051	-51.2853	-64.524	-16.7321	-10.4746	-36.2536	-41.6295	-28.8008	-24.6591	-46.2206	-42.2407	16.0335	14.5894
-0.0113954	-47.5644	-64.961	-58.5727	-19.7995	-14.3517	-47.0407	-45.4188	-45.2434	-43.9466	-70.8067	-13.8118	-39.1268	-37.1926	-50.1919	-48.1083	-48.363	-27.3512	-22.5062	-3.57998	-50.7379	-40.2257	-16.1976	-41.7885	-21.4233	-47.7987	-67.7596	-69.5588	-45.631	-20.2341	-32.5933	-27.7628	-31.8612	-15.5793	-53.8915	-50.4376	-45.0593	-40.9066	-47.8334	-64.8014	-14.547	-14.7554	-36.2468	-37.8845	-32.8913	-31.8097	-46.3662	-41.975	16.6771	13.5891
-4.89828	-59.8508	-64.3114	-58.8975	-29.513	-25.669	-44.8774	-43.4704	-45.9081	-44.3166	-72.919	-13.1252	-39.0741	-36.3269	-47.1178	-44.5648	-54.2886	-37.7295	-20.0414	1.19699	-58.0862	-51.5705	-13.895	-41.8071	-30.512	-54.1167	-69.6279	-69.9671	-50.7994	-29.9108	-30.2975	-25.6164	-44.2009	-25.1216	-57.4809	-54.136	-46.768	-48.3625	-44.89	-64.2108	-16.5512	-21.5124	-34.4984	-33.2844	-38.2364	-39.4988	-45.4506	-40.7166	16.4161	13.046
[truncated: 2 more columns]
