# Supplementary material for: Effects of knee sleeves on coordination of lower-limb segments in healthy adults during level walking and one-leg hopping
Source: PeerJ. 2017 May 18;5:e3340. doi: 10.7717/peerj.3340 (PMC5438577; doi:10.7717/peerj.3340)
Supplement: Supplemental Information 3 [file peerj-05-3340-s003.xlsx]

## Sheet: Sheet1
	GAIT												ONE-LEG HOP
	STEP WIDTH (cm)		VELOCITY		STRIDE LENGTH		CADENCE		STANCE		SWING		FIGHT TIME		DISTANCE
	NO SLEEVE	WITH SLEEVE	NO SLEEVE	WITH SLEEVE	NO SLEEVE	WITH SLEEVE	NO SLEEVE	WITH SLEEVE	NO SLEEVE	WITH SLEEVE	NO SLEEVE	WITH SLEEVE	NO SLEEVE	WITH SLEEVE	NO SLEEVE	WITH SLEEVE
SUB1	10.55	16.63	128.479	127.639	143.263	142.716	107.479	108.755	64.178	63.788	35.822	36.212	0.23	0.27	107.2	107.7
SUB2	13.76	9.68	128.568	141.23	123.113	136.203	125.217	123.077	64.348	62.393	35.652	37.607	0.23	0.23	133.3	126.1
SUB3	10.14	13.93	128.562	135.646	142.536	149.217	107.463	108.271	65.672	65.414	34.328	34.586	0.23	0.23	118.6	122.7
SUB4	7.34	8.77	141.021	136.382	154.901	151.32	108.694	108.296	60.741	61.264	39.259	38.736	0.23	0.25	117.6	108.4
SUB5	11.39	10.26	134.916	137.849	144.113	148.445	111.628	112.5	62.791	62.5	37.209	37.5	0.23	0.25	123.1	121.1
SUB6	12.45	12.76	147.233	144.654	156.759	153.657	112.974	112.064	60.205	60.313	39.795	39.686	0.26	0.29	130.7	124.4
SUB7	13.41	16.26	138.175	135.431	139.492	135.972	118.101	118.521	61.184	61.733	38.816	38.267	0.26	0.28	115.8	111.6
SUB8	14.31	15.85	142.075	133.667	151.406	143.118	112.528	111.655	62.912	63.211	37.088	36.788	0.29	0.24	104.7	111.7
SUB9	11.34	12.69	128.247	147.284	153.817	161.394	99.315	109.508	61.734	61.598	38.266	38.402	0.25	0.3	119.8	124.1
SUB10	12.69	11.57	135.557	150.641	158.159	168.134	103.227	107.077	62.723	61.341	37.277	38.659	0.25	0.32	116.5	115.6
SUB11	15.88	13.99	142.948	150.535	152.166	157.393	113.386	115.208	61.811	61.597	38.189	38.403	0.28	0.25	128.1	123
MEAN	12.1145	12.9445	135.98	140.087	147.248	149.779	110.91	112.267	62.5726	62.2865	37.4274	37.7133	0.249091	0.264545	119.582	117.855
SD	2.32585	2.68998	6.85494	7.42168	10.2141	10.092	7.014	4.93667	1.66412	1.41553	1.66412	1.41546	0.0216585	0.0297871	8.9457	6.96353
