# Supplementary material for: Effects of knee sleeves on coordination of lower-limb segments in healthy adults during level walking and one-leg hopping
Source: PeerJ. 2017 May 18;5:e3340. doi: 10.7717/peerj.3340 (PMC5438577; doi:10.7717/peerj.3340)
Supplement: Supplemental Information 4 [file peerj-05-3340-s004.xlsx]

## Sheet: Sheet1
			GAIT		ONE-LGE HOP
			NO SLEEVE	WITH SLEEVE	NO SLEEVE	WITH SLEEVE
THIGH	INITIAL	SUB1	28.7769	28.1432	43.681	41.1018
		SUB2	29.8866	28.0396	33.6201	29.4201
		SUB3	24.6043	22.8729	35.4653	29.2582
		SUB4	25.0395	24.7855	39.961	43.9302
		SUB5	27.1016	22.718	42.4956	41.2963
		SUB6	28.9949	25.7524	35.3327	36.0605
		SUB7	26.7501	26.789	37.0407	37.5107
		SUB8	32.9291	33.6416	43.8794	49.1557
		SUB9	31.5427	28.0621	38.3466	39.1579
		SUB10	25.7533	24.9976	27.4343	30.504
		SUB11	29.3081	26.6957	38.4417	34.5913
		MEAN	28.2443	26.5907	37.7908	37.4533
		SD	2.66018	3.02918	4.85805	6.32458
	MIN	SUB1	-10.0784	-13.6872	-5.7113	-10.1739
		SUB2	-14.5336	-20.9522	-8.51151	-11.8737
		SUB3	-15.9614	-17.9103	-3.13273	-17.9356
		SUB4	-16.3269	-13.6446	-9.89964	-7.40881
		SUB5	-15.6666	-19.2838	0.789164	-6.62575
		SUB6	-19.3197	-22.1324	-8.09625	-9.78431
		SUB7	-13.0441	-15.3855	-7.11741	-7.36254
		SUB8	-16.0448	-18.8159	-1.49941	-3.22174
		SUB9	-12.1752	-15.337	-2.87418	-6.85653
		SUB10	-15.1109	-17.7906	-11.09	-8.06371
		SUB11	-15.8743	-18.4822	-1.01688	-7.41091
		MEAN	-14.9214	-17.5838	-5.28729	-8.7925
		SD	2.44612	2.79253	3.95896	3.7664
	MAX	SUB1	N/A	N/A	41.1953	37.7579
		SUB2	N/A	N/A	26.3906	28.7638
		SUB3	N/A	N/A	36.5602	31.1956
		SUB4	N/A	N/A	25.8669	30.9469
		SUB5	N/A	N/A	31.9783	32.1584
		SUB6	N/A	N/A	34.1725	42.8223
		SUB7	N/A	N/A	32.5161	39.8484
		SUB8	N/A	N/A	34.3418	32.2466
		SUB9	N/A	N/A	30.1997	30.7725
		SUB10	N/A	N/A	35.4622	32.4881
		SUB11	N/A	N/A	36.188	33.7692
		MEAN	N/A	N/A	33.1701	33.8881
		SD	N/A	N/A	4.50117	4.35713
SHANK	INITIAL	SUB1	14.2301	15.9452	5.68981	6.02616
		SUB2	21.0191	25.1696	14.6018	16.171
		SUB3	17.8679	19.6013	11.8278	21.6842
		SUB4	20.8085	19.6321	6.4806	-1.42221
		SUB5	20.9368	23.7756	16.5956	13.2507
		SUB6	20.8162	23.1021	15.5837	24.9324
		SUB7	16.7381	19.7893	11.3995	9.16463
		SUB8	16.6523	19.9251	3.00331	9.10692
		SUB9	13.8482	19.0208	10.8712	16.9746
		SUB10	14.1711	19.2676	12.1921	13.9402
		SUB11	18.4702	17.9653	4.82944	-3.47887
		MEAN	17.778	20.2904	10.2795	11.4863
		SD	2.87703	2.68509	4.60991	8.81731
	MIN	SUB1	-59.8521	-57.4794	-52.4964	-45.0708
		SUB2	-57.593	-55.695	-39.5873	-36.1358
		SUB3	-58.1053	-53.6565	-45.5197	-41.5376
		SUB4	-54.3186	-52.1068	-37.7541	-33.0413
		SUB5	-63.42	-58.0913	-47.2468	-35.9637
		SUB6	-61.0827	-56.4747	-39.3465	-35.8716
		SUB7	-58.5897	-58.368	-41.8341	-34.4314
		SUB8	-55.9371	-55.7625	-45.5345	-33.0579
		SUB9	-61.1815	-55.619	-42.786	-35.9851
		SUB10	-59.691	-56.8953	-43.4667	-40.6633
		SUB11	-61.1451	-60.2511	-38.5164	-39.1486
		MEAN	-59.1742	-56.4	-43.0989	-37.3552
		SD	2.61438	2.24616	4.41726	3.79881
	MAX	SUB1	N/A	N/A	12.0086	12.3343
		SUB2	N/A	N/A	6.42348	14.77
		SUB3	N/A	N/A	12.0932	6.60046
		SUB4	N/A	N/A	-3.17793	0.216259
		SUB5	N/A	N/A	4.87861	10.0647
		SUB6	N/A	N/A	5.90935	8.2794
		SUB7	N/A	N/A	5.84885	11.455
		SUB8	N/A	N/A	0.987299	3.57378
		SUB9	N/A	N/A	0.288169	7.24502
		SUB10	N/A	N/A	4.02874	7.33371
		SUB11	N/A	N/A	6.11763	7.93593
		MEAN	N/A	N/A	5.03691	8.1644
		SD	N/A	N/A	4.58674	4.04665
FOOT	INITIIAL	SUB1	80.8332	81.5084	80.2262	82.7156
		SUB2	76.1884	73.7595	80.371	81.8522
		SUB3	77.127	75.9427	85.2585	79.9709
		SUB4	71.4375	68.1031	75.8207	73.4906
		SUB5	67.4293	68.6294	67.5559	73.1374
		SUB6	71.5317	72.2656	78.087	67.0438
		SUB7	77.1976	74.3223	80.2024	84.5421
		SUB8	70.6554	71.5405	83.1919	82.5569
		SUB9	71.9294	71.1581	71.5783	67.6641
		SUB10	69.6931	69.0977	68.7427	71.724
		SUB11	78.6318	79.8328	79.4356	72.2637
		MEAN	73.8777	73.2873	77.3155	76.0874
		SD	4.27352	4.39919	5.76844	6.38301
	1ST PEAK	SUB1	86.3656	87.5366	N/A	N/A
		SUB2	89.534	85.6638	N/A	N/A
		SUB3	80.742	78.77	N/A	N/A
		SUB4	74.2448	72.009	N/A	N/A
		SUB5	83.0504	80.6764	N/A	N/A
		SUB6	85.1821	84.9484	N/A	N/A
		SUB7	84.2811	82.3814	N/A	N/A
		SUB8	80.1995	79.8844	N/A	N/A
		SUB9	81.0152	77.608	N/A	N/A
		SUB10	75.1705	79.6259	N/A	N/A
		SUB11	79.3335	79.8778	N/A	N/A
		MEAN	81.7381	80.8165	N/A	N/A
		SD	4.59552	4.28275	N/A	N/A
	MIN	SUB1	5.7554	7.6017	25.2161	21.951
		SUB2	1.79615	1.58481	27.1034	29.9328
		SUB3	-0.853233	-1.03832	13.6045	12.3548
		SUB4	-4.60094	-5.90042	7.8482	12.7965
		SUB5	2.69024	3.72101	18.8249	14.3876
		SUB6	-9.59687	-8.03268	12.115	13.7119
		SUB7	12.1161	9.06415	23.2136	24.1468
		SUB8	-0.991866	-1.51626	21.7501	19.633
		SUB9	5.61461	4.16689	23.2056	19.8592
		SUB10	1.40454	0.480431	18.4742	17.0973
		SUB11	0.63382	3.72293	23.5359	17.5125
		MEAN	1.26982	1.25948	19.5356	18.4894
		SD	5.67037	5.22516	6.04909	5.39174
	2ND PEAK	SUB1	86.8171	86.8438	N/A	N/A
		SUB2	83.4882	84.1054	N/A	N/A
		SUB3	75.6669	74.0804	N/A	N/A
		SUB4	69.2385	68.5167	N/A	N/A
		SUB5	71.4043	71.9791	N/A	N/A
		SUB6	84.3785	82.0917	N/A	N/A
		SUB7	82.88	83.5488	N/A	N/A
		SUB8	73.5073	78.4253	N/A	N/A
		SUB9	79.7166	79.0576	N/A	N/A
		SUB10	70.1961	71.5299	N/A	N/A
		SUB11	83.5834	84.2663	N/A	N/A
		MEAN	78.2615	78.5859	N/A	N/A
		SD	6.42282	6.19046	N/A	N/A
	MAX	SUB1	N/A	N/A	88.9493	85.4946
		SUB2	N/A	N/A	89.5137	87.7886
		SUB3	N/A	N/A	85.7458	88.6276
		SUB4	N/A	N/A	65.2779	62.9835
		SUB5	N/A	N/A	80.5401	81.34
		SUB6	N/A	N/A	84.2039	76.0726
		SUB7	N/A	N/A	78.758	77.6289
		SUB8	N/A	N/A	78.6528	77.0753
		SUB9	N/A	N/A	82.7517	78.3246
		SUB10	N/A	N/A	83.0273	85.026
		SUB11	N/A	N/A	64.7991	69.1335
		MEAN	N/A	N/A	80.2018	79.045
		SD	N/A	N/A	8.3008	7.88899
